# Supplementary material for: Annexin A11 (ANXA11) gene polymorphisms are associated with sarcoidosis in a Han Chinese population: a case–control study
Source: PubMed Central journal article supplement — BMJ Open. 2014 Jul 22;4(7):e004466. doi: 10.1136/bmjopen-2013-004466 (PMC4120255; doi:10.1136/bmjopen-2013-004466), 2014-07-22
Supplement: bmjopen-2013-004466.draft_revisions.pdf [file bmjopen-2013-004466.draft_revisions.pdf]

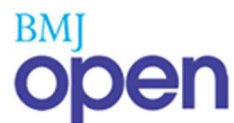

**Annexin A11 (ANXA11) gene polymorphisms are associated with sarcoidosis in Han Chinese**

|                                 |                                                           |
|---------------------------------|-----------------------------------------------------------|
| Journal:                        | <i>BMJ Open</i>                                           |
| Manuscript ID:                  | bmjopen-2013-004466                                       |
| Article Type:                   | Research                                                  |
| Date Submitted by the Author:   | 14-Nov-2013                                               |
| Complete List of Authors:       | Zhang, LG<br>Xiao, ZJ<br>Shi, GC<br>J, Huang<br>Zhang, CX |
| <b>Primary Subject Heading</b>: | Infectious diseases                                       |
| Secondary Subject Heading:      | Genetics and genomics                                     |
| Keywords:                       | GENETICS, IMMUNOLOGY, INFECTIOUS DISEASES                 |
|                                 |                                                           |

SCHOLARONE™  
Manuscripts

Peer Review Only

**Annexin A11 (ANXA11) gene polymorphisms are associated with sarcoidosis in****Han Chinese**

LG Zhang, ZJ Xiao \*, GC Shi, J Huang, CX Zhang

Internal Medicine - Tuberculosist, First Hospital Affiliated to the Xinxiang Medical  
College, Xinxiang, Henan, PR China

\* Corresponding author: Zhijian Xiao, Internal Medicine - Tuberculosis, First  
Hospital Affiliated to the Xinxiang Medical College, Xinxiang, Henan, PR China  
No.88 Jiankang Road, Weihui City, Henan, 463000, PR China

E-mail: zhangligongys@163.com

Tel: +86 0373 - 4402229 (office)

Fax: +86 0373 - 4402251

**Key words:** Sarcoidosis; Annexin A11; Single-nucleotide polymorphism

**Word count:** 2324

**Abstract**

**Objectives:** To further identify SNPs that contribute to the genetic susceptibility to sarcoidosis, we examined the potential association between sarcoidosis and fifteen SNPs of the ANXA11 gene.

**Design:** Case - control study.

**Setting:** A university hospital tuberculosis units in China.

**Participants:** Participants included 412 patients with sarcoidosis and 418 healthy controls.

**Methods:** The selected SNPs were genotyped in cases and controls by using the MALDI - TOF in the MassARRAY system (Sequenom Inc., San Diego, CA, USA). Probes and primers were designed using the Assay Design Software (Sequenom, San Diego, CA, USA).

**Results:** The results showed that statistically significant differences were observed in the allelic or genotypic frequencies of the rs2789679, rs1049550 and rs2819941 in the ANXA11 gene. The frequency of the T allele in rs2789679 ( $\chi^2 = 12.849$ ,  $P = 0.0003$ , OR = 0.703, 95%CI = 0.579 - 0.852), T allele in rs1049550 ( $\chi^2 = 24.420$ ,  $P = 0.0007$ , OR = 0.617, 95%CI= 0.503 - 0.758) and the rs2819941 C allele frequency ( $\chi^2 = 11.803$ ,  $P = 0.001$ , OR = 0.713, 95%CI = 0.588 - 0.865) in the patients with sarcoidosis was significantly lower than that in the controls. Furthermore, strong linkage disequilibrium (LD) was observed in two blocks ( $D' > 0.9$ ). In block 2, the T - C haplotype occurred significantly less frequently ( $P = 0.001$ ), whereas the C - C haplotypes occurred more frequently ( $P = 0.0001$ ). Significantly more G - G - C

1  
2  
3 haplotypes (block 4) ( $P = 0.027$ ) were found in the patients with sarcoidosis, but did  
4  
5 not pass the threshold value ( $P = 0.025$ ).  
6  
7

8 **Conclusions:** These findings point to a role for ANXA11 gene polymorphisms in  
9  
10 sarcoidosis in the Han Chinese, and may be informative for future genetic or  
11  
12 biological studies on sarcoidosis.  
13  
14  
15  
16  
17  
18  
19  
20  
21  
22  
23  
24  
25  
26  
27  
28  
29  
30  
31  
32  
33  
34  
35  
36  
37  
38  
39  
40  
41  
42  
43  
44  
45  
46  
47  
48  
49  
50  
51  
52  
53  
54  
55  
56  
57  
58  
59  
60

## Article summary

### Article focus

1. The first genome - wide association study (GWAS) in sarcoidosis conducted in a German population has revealed an association: the rs1049550 (C > T, Arg230Cys) located in exon 10 was associated with sarcoidosis.
2. More studies should be performed to demonstrate the following item: whether these SNPs modulate the risk of sarcoidosis by themselves or whether they correlate with other causative SNPs and are repeated in other populations.
3. We hypothesize that common variants in the ANXA11 gene may significantly contribute to the predisposition to develop sarcoidosis in Han Chinese.

### Key messages

1. ANXA11 rs2789679 (3'UTR) was found to be associated with sarcoidosis.
2. ANXA11 rs1049550 (exon 10) was significantly associated with sarcoidosis.
3. Another significant association was observed for rs2819941 (intron 14).

### Strengths and limitations of this study

1. Functional SNPs in the promoter region, 5'- and 3'-UTR, exons of ANXA11 gene were systematically screened and homogeneity of the study subjects, representing the Han Chinese, is the main strength of the current study.
2. Functional characterisation is the potential limitation of the study that could have further helped in proving the positive association observed for rs2789679 and rs1049550. The lack of correlation of serum ANXA11 levels and sample size are other limitations.

## INTRODUCTION

Sarcoidosis is a systemic autoimmune disease characterized by destructive, noncaseating epithelioid granulomatous lesions, with accumulated phagocytes and activated CD4<sup>+</sup> T helper type 1 lymphocytes<sup>1 2</sup>. The typical manifestations of sarcoidosis include bilateral hilar lymphadenopathy, pulmonary infiltration and ocular and skin lesions. The clinical course and prognosis of sarcoidosis is variable. The acute forms of sarcoidosis such as Löfgren's syndrome (LS) can resolve spontaneously in most cases. However, chronic pulmonary sarcoidosis may progress to lung fibrosis and eventually result in respiratory failure. Recent studies demonstrated that sarcoidosis occurs in a pattern of family clustering, and its racial incidence is also different, suggesting that some genetic factors may contribute to the risk and severity of sarcoidosis<sup>1 3</sup>.

Annexin gene family is involved in the etiology of several autoimmune and chronic diseases<sup>4 5</sup>. One member of Annexin gene family, ANXA11, located on chromosome 10q22.3, is involved in calcium signaling, apoptosis, vesicle trafficking, cell growth and terminal phase of cell division<sup>5-7</sup>. In this context, the development and maintenance of granulomatous inflammation in sarcoidosis have been repeatedly associated with the impaired apoptosis of activated inflammatory cells<sup>8 9</sup>. In most patients with sarcoidosis, the early stages of this disease are characterized by mononuclear cell alveolitis dominated by activated CD4<sup>+</sup> T cells and macrophages. Between these cells, the uncoordinated interplay results in the formation of typical noncaseating granulomas. The mechanism by which the granulomas resolve has not

1  
2  
3  
4 been fully elucidated. However, it is generally assumed that the induction of apoptosis  
5  
6 and / or by the withdrawal of inflammatory cytokines participates in the  
7  
8 disappearance of granulomas<sup>10 11</sup>. In patients with sarcoidosis, their peripheral blood  
9  
10 monocytes were characterized by apoptosis<sup>9</sup>.  
11  
12

13  
14 In previous studies, case - control / family ‘hypothesis - driven’ studies and low  
15  
16 density linkage scans were used to identify genetic factors conferring susceptibility to  
17  
18 sarcoidosis<sup>12</sup>. Notably, the first genome - wide association study (GWAS) in  
19  
20 sarcoidosis conducted in a German population has recently revealed an association:  
21  
22 the leading rs2789679 SNP located in the 3’ - untranslated region (3’UTR) and a  
23  
24 common nonsynonymous SNP (rs1049550, C > T, Arg230Cys) were associated with  
25  
26 increased risk of sarcoidosis<sup>4</sup>. This association has recently been supported by  
27  
28 another report from the same population<sup>13</sup>. Thus, more studies should be performed  
29  
30 to demonstrate the following item: whether these SNPs modulate the risk of  
31  
32 sarcoidosis by themselves or whether they correlate with other causative SNPs and are  
33  
34 repeated in other populations. The published sarcoidosis - association studies for  
35  
36 ANXA11 summarized in Table 1. We hypothesize that common variants in the  
37  
38 ANXA11 gene may significantly contribute to the predisposition to develop  
39  
40 sarcoidosis.  
41  
42  
43  
44  
45  
46  
47  
48

49 In this study, we investigated fifteen loci in a Chinese population from He’nan  
50  
51 province (China) to verify the putative association between ANXA11 polymorphisms  
52  
53 and sarcoidosis.  
54  
55

## 56 **SUBJECTS AND METHODS**

57  
58  
59  
60

## Subjects

Four - hundred and twelve patients with sarcoidosis (mean  $\pm$  SD age;  $53.6 \pm 4.6$  years) were recruited from our hospital between May 2005 and March 2013. Sarcoidosis was diagnosed by the evidence of non - caseating epitheloid cell granuloma in biopsy specimens and chest radiographic abnormalities. Chronic sarcoidosis was defined as a disease over at least 2 years or at least two episodes in a lifetime. Acute sarcoidosis was defined as one episode of acute sarcoidosis which had totally resolved at the date of the examination. The control group consisted of 418 unrelated healthy subjects (mean  $\pm$  SD age;  $54.2 \pm 5.3$  years) who underwent health examinations in the Medical Examination Center of the First Affiliated Hospital of the Xin'xiang Medical College (Xinxiang, China). None of the individuals in the control group had a history of lung diseases or showed any symptoms of the lung or other diseases by chest radiography or laboratory blood tests. All participants were from a non - genetically related Chinese Han population in He'nan Province (China). The study was performed according to the Guidelines of the Medical Ethical Committee of Xin'xiang Medical College (Xinxiang, China). Written informed consent was obtained from each participant in this study.

## SNP selection

Tagging SNPs were selected from the catalogs of the International HapMap Project and the 1000 Genomes Project. The rs2789679 and rs2245168 are located in 5' - UTR, rs2236558 in intron 6, rs7067644 and rs12763624 in intron 8, rs1049550 in exon10, rs2573351 in intron 13, rs10887581, rs11201989, rs2573353, rs2789695,



1  
2  
3  
4 rs2573356, rs2819945, rs11202059 and rs2819941 in intron 14. Marker selection was  
5  
6 done according to previous studies <sup>4 12-14</sup>, and preliminary analysis was performed  
7  
8 using the HapMap data (Fig 1). We examined tagSNPs in the Haploview software  
9  
10 v4.2, using the Chinese Han in Beijing (CHB) population and a minor allele  
11  
12 frequency cut-off (MAF)  $\geq$  5% (the HapMap Data Release 27). The linkage  
13  
14 disequilibrium (LD) pattern of this gene was determined in the Chinese population  
15  
16 using the preliminary data from the HapMap. These SNPs were further analyzed in an  
17  
18 association study.  
19  
20  
21  
22

### 23 24 **Genotyping**

25  
26 Peripheral blood was collected from a vein into a sterile tube coated with  
27  
28 ethylenediamine tetraacetic acid (EDTA). Plasma samples were stored at -20°C.  
29  
30 Genomic DNA was extracted from the frozen peripheral blood samples using a  
31  
32 QIAmp Blood Mini Kit (Qiagen Inc., Valencia, CA, USA) according to the  
33  
34 manufacturer's protocols. The selected SNPs were genotyped in cases and controls by  
35  
36 using the MALDI - TOF in the MassARRAY system (Sequenom Inc., San Diego, CA,  
37  
38 USA). Probes and primers were designed using the Assay Design Software  
39  
40 (Sequenom, San Diego, CA, USA). The completed genotyping reactions were spotted  
41  
42 onto a 384 well spectroCHIP (Sequenom) using the MassARRAY Nanodispenser  
43  
44 (Sequenom) and determined by the matrix - assisted laser desorption ionization time -  
45  
46 of - flight mass spectrometer. Genotype calling was performed in realtime with the  
47  
48 MassARRAY RT software version 3.0.0.4 and analyzed using the MassARRAY Typer  
49  
50 software version 3.4 (Sequenom).  
51  
52  
53  
54  
55  
56  
57  
58  
59  
60

### Statistical analysis

All statistical analyses were performed using the SPSS 17.0 software (SPSS Inc., Chicago, IL, USA). Allele and genotype frequencies for each individual polymorphism and Hardy - Weinberg equilibrium were evaluated by Chi - square tests. Differences between the cases and controls in the frequency of the alleles, genotypes and haplotypes were evaluated by the Fisher's exact test or the Pearson Chi - square test. Unconditional logistic regression was used to calculate the odds ratio (OR) and 95% confidence interval (CI) in independent association between each locus and the presence of sarcoidosis. The Bonferroni correction was used to adjust the test level when multiple comparisons were conducted, and the *P* value was divided by the total number of loci or haplotypes. Haplotype blocks were defined according to the criteria developed by Gabriel et al.<sup>14</sup>, as implemented in the Haploview 4.0, to examine if some SNPs significant in the single - marker association analysis also exist in the haplotype blocks. Pair - wise LD statistics (*D'* and *r*<sup>2</sup>) and haplotype frequency were calculated, and haplotype blocks were constructed using the Haploview 4.0<sup>15</sup>.

### RESULTS

The genotype distribution of the fifteen polymorphisms was consistent with the Hardy - Weinberg equilibrium (*P* > 0.05). The analysis of strong LD in the patients with sarcoidosis and the healthy controls revealed that 2 SNPs (rs2245168, rs2236558), 2 SNPs (rs1049550, rs2573351), 2 SNPs (rs2789695, rs2573356) and 3 SNPs (rs2819945, rs11202059, rs2819941) were located in haplotype block 1, block 2, block 3 and block 4 (*D'* > 0.9, Fig. 2). The genotype distribution, allelic frequencies,

1  
2  
3  
4 and haplotypes in the patients with sarcoidosis and the healthy controls are showed in  
5  
6 Tables 2 and Table 3.  
7

8  
9 Comparison of genotype and allele frequency distribution revealed significant  
10  
11 differences between the patients with sarcoidosis and healthy controls for 3 SNPs:  
12  
13 rs2789679, rs1049550 and rs2819941. The frequency of the T allele in rs2789679 ( $\chi^2$   
14  
15 = 12.849,  $P = 0.0003$ , OR = 0.703, 95% CI = 0.579 - 0.852), T allele in rs1049550 ( $\chi^2$   
16  
17 = 24.420,  $P = 0.0007$ , OR = 0.617, 95% CI = 0.503 - 0.758) and the rs2819941 C  
18  
19 allele frequency ( $\chi^2 = 11.803$ ,  $P = 0.001$ , OR = 0.713, 95% CI = 0.588 - 0.865) in the  
20  
21 patients with sarcoidosis was significantly lower than that in the controls, and these  
22  
23 differences remained statistically significant after Bonferroni corrections.  
24  
25  
26  
27

28  
29 Due to the positive association between 2 SNPs (rs1049550 and rs2819941), and  
30  
31 sarcoidosis, we performed an association analysis to determine whether the haplotype  
32  
33 was associated with the risk of sarcoidosis. Compared with the healthy controls, the T  
34  
35 - C haplotype occurred significantly less frequently ( $P = 0.001$ ) and the C - C  
36  
37 haplotypes occurred more frequently ( $P = 0.0001$ ) in block 2 in the patients with  
38  
39 sarcoidosis. The significantly more G - G - C haplotypes (block 4) ( $P = 0.027$ ) were  
40  
41 found in the patients with sarcoidosis, but did not pass the threshold value ( $P =$   
42  
43  
44  
45  
46  
47 0.025).  
48

## 49 DISCUSSION

50  
51 A key step in linkage and association studies is to identify common risk variants  
52  
53 in different populations. To determine if common risk variants exist in distinct  
54  
55 populations, fifteen SNPs which span approximately 0.53 Mb of the ANXA11 gene,  
56  
57  
58  
59  
60

1  
2  
3  
4 were genotyped in samples from the patients with sarcoidosis and healthy controls in  
5  
6 a Chinese Han population. Recently, new sarcoidosis loci have been identified by  
7  
8 genome - wide association studies <sup>4 13</sup>. With the fast development of genome-wide  
9  
10 association studies, increasing number of susceptibility loci for sarcoidosis have been  
11  
12 reported in various populations <sup>4 13-14</sup>. However, these observations should be  
13  
14 confirmed in other genetically independent populations. In this study, we conducted  
15  
16 the first large genetic association study of the ANXA11 gene in a Chinese Han  
17  
18 population. The evidence of markers associated with sarcoidosis was presented, and  
19  
20 these markers were mapped to different locations in the ANXA11 gene (81897864 -  
21  
22 81951001). The association signals in the region were identified, and some  
23  
24 significantly associated haplotypes also appeared this region.  
25  
26  
27  
28  
29  
30

31 Hoffman et al. reported an association between the T allele of the non -  
32  
33 synonymous SNP rs1049550 and significantly decreased risk of sarcoidosis in a  
34  
35 German population <sup>4</sup>. Similar results were also obtained in other two European  
36  
37 populations <sup>13 14</sup>. As a part of the sarcoidosis GWAS done in Americans <sup>16</sup>, we further  
38  
39 confirmed this association in a Chinese Han population. In this study, the frequency of  
40  
41 ANXA11 rs1049550 T allele was significantly lower in the patients with sarcoidosis  
42  
43 than that in the healthy controls. The “protective” effect of ANXA11 T allele  
44  
45 increased with the number of its copies in the genotype, which is consistent with the  
46  
47 result obtained in the patients with sarcoidosis in a German population <sup>4</sup>, Furthermore,  
48  
49 the T allele carriers among the patients were protected from infiltration of lung  
50  
51 parenchyma (radiographic stages II-IV) <sup>14</sup>. We have also demonstrated that rs1049550  
52  
53  
54  
55  
56  
57  
58  
59  
60

1  
2  
3  
4 is significant cross-ethnically at the gene level after adjustment for the single SNP  
5  
6 association tests performed. The mechanism by which rs1049550 SNP affects the  
7  
8 susceptibility to sarcoidosis may be that the SNP may affect the function of the  
9  
10 ANXA11 protein rather than affect its expression. In humans, the ANXA11 protein  
11  
12 consists of an N - terminal proline - tyrosine - glycine (PYG) - rich region, followed  
13  
14 by four annexin core domains. The SNP rs1049550 leads to an amino - acid exchange  
15  
16 (basic arginine to a polar cysteine) at the evolutionarily conserved position 230  
17  
18 (R230C) in the first annexin domain, which is responsible for Ca<sup>2+</sup> - dependent  
19  
20 trafficking of the protein in the cell <sup>17</sup>.

21  
22 In the GWAS conducted by Hofmann et al <sup>4</sup>, the strongest association signal was  
23  
24 observed for SNP rs2789679. This marker is located in the 3' - UTR of the ANXA11  
25  
26 gene. The T allele had a frequency of 35% among the patients with sarcoidosis and 44%  
27  
28 in controls, with 13% of the patients with sarcoidosis and 19% of controls being TT  
29  
30 homozygous. Fine - mapping in the Black Women's Health Study (BWHS) revealed  
31  
32 rs2819941 to be the top SNP, associated with a nonsignificant ( $P = 0.06$ ) reduction in  
33  
34 sarcoidosis risk (17% reduction per copy of the C - allele). In this case - control  
35  
36 association study, the frequency of the T allele in rs2789679 and the rs2819941 C  
37  
38 allele frequency in the patients with sarcoidosis was significantly lower than that in  
39  
40 the controls. Several lines of evidence suggest that the observed associations are  
41  
42 unlikely to be an artifact. First, both the single - SNP and the haplotype - based  
43  
44 association analyses support the current finding. Second, population stratification is  
45  
46 an impossible reason, because all of our samples were from the same geographical  
47  
48  
49  
50  
51  
52  
53  
54  
55  
56  
57  
58  
59  
60

1  
2  
3  
4 region. Finally, consistent results were obtained from two genetically independent  
5  
6 populations (Han Chinese and Europeans). Collectively, our results confirmed the  
7  
8 strong association between variations in the ANXA11 gene and sarcoidosis, and  
9  
10 suggest that ANXA11 represents a strong genetic risk factor for sarcoidosis.  
11  
12

13  
14 We further investigated the interaction among polymorphisms and observed  
15  
16 strong LD. The haplotype analysis revealed that significantly more C - C (block 2),  
17  
18 and G - G - C (block 4) haplotypes and significantly fewer T - C haplotypes (block 2)  
19  
20 were found in the patients with sarcoidosis. There were significant point - wise  
21  
22 associations of these variants with sarcoidosis (rs2789679, rs1049550 and rs2819941).  
23  
24 These results indicated that the patients with C - C (block 2), and G - G - C (block 4)  
25  
26 haplotypes of the ANXA11 gene were more prone to sarcoidosis. Significantly higher  
27  
28 frequencies of T - C haplotypes were detected in the healthy controls than in the  
29  
30 patients with sarcoidosis, suggesting that they may show a protective effect against  
31  
32 sarcoidosis. To some extent, this finding further supports a role of ANXA11  
33  
34 polymorphisms in sarcoidosis, while ethnic group difference may exist.  
35  
36  
37  
38  
39  
40

41  
42 In conclusion, our study suggests a potential role of the ANXA11 SNPs and their  
43  
44 related haplotypes in the genetic susceptibility to sarcoidosis. Further studies are  
45  
46 needed to investigate how these SNPs affect the function of ANXA11.  
47  
48

#### 49 **Contributors**

50  
51 LG Zhang was involved in conception and design of the study, acquisition of  
52  
53 patient data, genotyping and drafted the paper. ZJ Xiao and GC Shi were involved in  
54  
55 design of the study, genotyping and interpretation of results. J Huang and CX Zhang  
56  
57  
58  
59  
60

1  
2  
3 were involved in design of the study, acquisition of patient data and interpretation of  
4  
5  
6 result. All authors revised the draft paper.  
7

### 8 9 **Funding**

10  
11 The project was supported by the Research and Development Foundation of  
12  
13 Science and Technology of Henan Province (2012k15).  
14

### 15 16 **Competing interests**

17  
18 None.  
19

### 20 21 **Patient consent**

22  
23 Obtained.  
24

### 25 26 **Ethics approval**

27  
28 Ethics approval was provided by the First Hospital Affiliated to the Xinxiang  
29  
30 Medical College.  
31

### 32 33 **Provenance and peer review**

34  
35 Not commissioned; externally peer reviewed.  
36  
37

### 38 39 **Data sharing statement**

40  
41 No additional data are available.  
42  
43  
44  
45

### 46 47 **Figure Legend**

48  
49 **Fig. 1** The structure of the human ANXA11 gene and ten SNPs located on the gene.  
50

51  
52 **Fig. 2** The LD plot of the fifteen SNPs in the ANXA11 gene. Values in squares are the  
53  
54 pair - wise calculation of  $r^2$  (left) or  $D'$  (right). Black squares indicate  $r^2 = 1$  (i.e.  
55  
56 perfect LD between a pair of SNPs). Empty squares indicate  $D' = 1$  (i.e. complete LD  
57  
58  
59  
60

1  
2  
3  
4 between a pair of SNPs).

5  
6 **Reference**

- 7  
8  
9 1. Iannuzzi MC, Rybicki BA, Teirstein AS. Sarcoidosis. *N Engl J Med*  
10  
11 2007;357:2153-2165.  
12  
13  
14 2. Baughman RP, Lower EE, du Bois RM. Sarcoidosis. *Lancet* 2003;361:1111-1118.  
15  
16  
17 3. Grunewald J. Review: role of genetics in susceptibility and outcome of sarcoidosis.  
18  
19 *Semin Respir Crit Care Med* 2010;31:380-389.  
20  
21  
22 4. Hofmann S, Franke A, Fischer A, et al. Genome-wide association study identifies  
23  
24 ANXA11 as a new susceptibility locus for sarcoidosis. *Nat Genet*  
25  
26 2008;40:1103-1106.  
27  
28  
29 5. Gerke V, Moss SE. Annexins: from structure to function. *Physiol Rev*  
30  
31 2002;82:331-371.  
32  
33  
34 6. Farnaes L, Ditzel HJ. Dissecting the cellular functions of annexin XI using  
35  
36 recombinant human annexin XI-specific autoantibodies cloned by phage  
37  
38 display. *J Biol Chem* 2003;278:33120-33126.  
39  
40  
41 7. Tomas A, Futter C, Moss SE. Annexin 11 is required for midbody formation and  
42  
43 completion of the terminal phase of cytokinesis. *J Cell Biol*  
44  
45 2004;165:813-822.  
46  
47  
48  
49 8. Petzmann S, Maercker C, Markert E, et al. Enhanced proliferation and decreased  
50  
51 apoptosis in lung lavage cells of sarcoidosis patients. *Sarcoidosis, vasculitis,*  
52  
53 *and diffuse lung diseases : official journal of WASOG / World Association of*  
54  
55 *Sarcoidosis and Other Granulomatous Disorders* 2006;23:190-200.  
56  
57  
58  
59  
60



- 1  
2  
3  
4 9. Dubaniewicz A, Trzonkowski P, Dubaniewicz-Wybieralska M, Dubaniewicz A,  
5  
6 Singh M, Mysliwski A. Comparative analysis of mycobacterial heat shock  
7  
8 proteins-induced apoptosis of peripheral blood mononuclear cells in  
9  
10 sarcoidosis and tuberculosis. *J Clin Immunol* 2006;26:243-250.  
11  
12  
13  
14 10. Agostini C, Trentin L, Facco M, et al. Role of IL-15, IL-2, and their receptors in  
15  
16 the development of T cell alveolitis in pulmonary sarcoidosis. *J Immunol*  
17  
18 1996;157:910-918.  
19  
20  
21 11. Jullien D, Sieling PA, Uyemura K, Mar ND, Rea TH, Modlin RL. IL-15, an  
22  
23 immunomodulator of T cell responses in intracellular infection. *J Immunol*  
24  
25 1997;158:800-806.  
26  
27  
28  
29 12. Muller-Quernheim J, Schurmann M, Hofmann S, et al. Genetics of sarcoidosis.  
30  
31 *Clin Chest Med* 2008;29:391-414.  
32  
33  
34 13. Li Y, Pabst S, Kubisch C, Grohe C, Wollnik B. First independent replication study  
35  
36 confirms the strong genetic association of ANXA11 with sarcoidosis. *Thorax*  
37  
38 2010;65:939-940.  
39  
40  
41 14. Mrazek F, Stahelova A, Kriegova E, et al. Functional variant ANXA11 R230C:  
42  
43 true marker of protection and candidate disease modifier in sarcoidosis. *Genes*  
44  
45 *Immun* 2011;12:490-494.  
46  
47  
48  
49 15. Barrett JC, Fry B, Maller J, Daly MJ. Haploview: analysis and visualization of LD  
50  
51 and haplotype maps. *Bioinformatics* 2005;21:263-265.  
52  
53  
54 16. Levin AM, Iannuzzi MC, Montgomery CG, et al. Association of ANXA11 genetic  
55  
56 variation with sarcoidosis in African Americans and European Americans.  
57  
58  
59  
60

1  
2  
3  
4  
5  
6  
7  
8  
9  
10  
11  
12  
13  
14  
15  
16  
17  
18  
19  
20  
21  
22  
23  
24  
25  
26  
27  
28  
29  
30  
31  
32  
33  
34  
35  
36  
37  
38  
39  
40  
41  
42  
43  
44  
45  
46  
47  
48  
49  
50  
51  
52  
53  
54  
55  
56  
57  
58  
59  
60

*Genes Immun* 2013;14:13-18.

17. Tomas A, Moss SE. Calcium- and cell cycle-dependent association of annexin 11 with the nuclear envelope. *J Biol Chem* 2003;278:20210-20216.

For peer review only

**Table 1** Summary of all published sarcoidosis-association studies for ANXA11

| Study           | Population   |         | Type of Study | Sample Size (n) |         | Number of SNPs typed | Positive SNPs                   |
|-----------------|--------------|---------|---------------|-----------------|---------|----------------------|---------------------------------|
|                 | Ethnic group | Country |               | Sarcoidosis     | Control |                      |                                 |
| Hofmann S, 2008 | Caucasian    | Germany | Case-control  | 499             | 490     | GWAS                 | rs2789679, rs7091565, rs1049550 |
| Mrazek F, 2011  | Caucasian    | Czech   | Case-control  | 245             | 254     | 1                    | rs1049550                       |
| Cozier YC, 2012 | Caucasian    | America | Case-control  | 486             | 943     | 10p12-10q22          | rs2789679, rs2819941            |
| Li Y, 2013      | Caucasian    | Germany | Case-control  | 325             | 364     | 1                    | rs1049550                       |
| Levin AM, 2013  | Caucasian    | America | Case-control  | 1689            | 1252    | 25                   | rs1049550                       |

1  
2  
3  
4  
5  
6  
7  
8  
9  
10  
11  
12  
13  
14  
15  
16  
17  
18  
19  
20  
21  
22  
23  
24  
25  
26  
27  
28  
29  
30  
31  
32  
33  
34  
35  
36  
37  
38  
39  
40  
41  
42  
43  
44  
45  
46  
47  
48  
49

**Table 2** Genotype and allele frequencies of the ANXA11 gene polymorphisms in Controls (n=418) and sarcoidosis (n=412) and their associated risk

| Variable   | Location  | MAF   | Group    | Genotype (n, %) |              |              | Allele (n, %) |              | P <sup>a</sup> | P <sup>b</sup> | OR, 95% CI <sup>c</sup> |
|------------|-----------|-------|----------|-----------------|--------------|--------------|---------------|--------------|----------------|----------------|-------------------------|
|            |           |       |          | AA              | AT           | TT           | A             | T            |                |                |                         |
| rs2789679  | 3'UTR     | 0.388 | Controls | 79 (18.900)     | 225 (53.828) | 114 (27.273) | 383 (45.813)  | 453 (54.187) | 0.0007         | 0.0003         | 1.423, 1.173-1.726      |
|            |           |       | Cases    | 132 (32.039)    | 186 (45.146) | 94 (22.816)  | 450 (54.612)  | 374 (45.388) |                |                |                         |
| rs2245168  | 3'UTR     | 0.388 | Controls | 156 (37.321)    | 200 (47.847) | 62 (14.833)  | 512 (61.244)  | 324 (38.756) | 0.920          | 0.698          | 1.040, 0.854-1.266      |
|            |           |       | Cases    | 150 (36.408)    | 197 (47.816) | 65 (15.777)  | 497 (60.316)  | 327 (39.684) |                |                |                         |
| rs2236558  | intron 6  | 0.488 | Controls | 110 (26.316)    | 190 (45.455) | 118 (28.230) | 410 (49.043)  | 426 (50.957) | 0.172          | 0.917          | 1.010, 0.833-1.025      |
|            |           |       | Cases    | 94 (22.816)     | 214 (51.942) | 104 (25.243) | 402 (48.786)  | 422 (51.214) |                |                |                         |
| rs7067644  | intron 8  | 0.390 | Controls | 60 (14.354)     | 206 (49.282) | 152 (36.364) | 326 (38.995)  | 510 (61.005) | 0.173          | 0.109          | 1.177, 0.964-1.437      |
|            |           |       | Cases    | 54 (13.107)     | 182 (44.175) | 176 (42.718) | 290 (35.194)  | 534 (64.806) |                |                |                         |
| rs12763624 | intron 8  | 0.440 | Controls | 76 (18.182)     | 216 (51.675) | 126 (30.144) | 368 (44.019)  | 468 (55.981) | 0.118          | 0.216          | 1.131, 0.931-1.374      |
|            |           |       | Cases    | 76 (18.447)     | 186 (45.146) | 150 (36.408) | 338 (69.547)  | 486 (58.981) |                |                |                         |
| rs1049550  | exon 10   | 0.404 | Controls | 154 (36.842)    | 190 (45.455) | 74 (17.703)  | 498 (59.569)  | 338 (40.431) | 0.0002         | 0.0007         | 0.598, 0.488-0.734      |
|            |           |       | Cases    | 208 (50.485)    | 170 (41.262) | 34 (8.252)   | 586 (71.117)  | 238 (28.883) |                |                |                         |
| rs2573351  | intron 13 | 0.471 | Controls | 96 (22.967)     | 202 (48.325) | 120 (28.708) | 394 (47.129)  | 442 (52.871) | 0.437          | 0.564          | 0.945, 0.779-1.146      |

|            |           |       |          |              |              |              |              |              |        |       |                    |
|------------|-----------|-------|----------|--------------|--------------|--------------|--------------|--------------|--------|-------|--------------------|
|            |           |       | Cases    | 92 (22.330)  | 216 (52.427) | 104 (25.243) | 400 (48.544) | 424 (51.456) |        |       |                    |
|            |           |       |          | TT           | TC           | CC           | T            | C            |        |       |                    |
| rs10887581 | intron 14 | 0.500 | Controls | 114 (27.273) | 190 (45.455) | 114 (27.273) | 418 (50.000) | 418 (50.000) | 0.290  | 0.553 | 1.060, 0.874-1.285 |
|            |           |       | Cases    | 96 (23.301)  | 208 (50.485) | 108 (26.214) | 400 (48.544) | 424 (51.456) |        |       |                    |
|            |           |       |          | GG           | GC           | CC           | G            | C            |        |       |                    |
| rs11201989 | intron 14 | 0.425 | Controls | 130 (31.100) | 218 (52.153) | 70 (16.746)  | 478 (57.177) | 358 (42.823) | 0.144  | 0.293 | 1.110, 0.914-1.347 |
|            |           |       | Cases    | 128 (31.068) | 194 (47.087) | 90 (21.845)  | 450 (54.612) | 374 (45.388) |        |       |                    |
|            |           |       |          | CC           | CA           | AA           | C            | A            |        |       |                    |
| rs2573353  | intron 14 | 0.340 | Controls | 178 (42.584) | 196 (46.890) | 44 (10.526)  | 552 (66.029) | 284 (33.971) | 0.995  | 0.863 | 1.000, 0.817-1.226 |
|            |           |       | Cases    | 176 (42.718) | 192 (46.602) | 44 (10.680)  | 544 (66.019) | 280 (33.981) |        |       |                    |
|            |           |       |          | CC           | CT           | TT           | C            | T            |        |       |                    |
| rs2789695  | intron 14 | 0.349 | Controls | 52 (12.440)  | 188 (44.976) | 178 (42.584) | 292 (34.928) | 544 (65.072) | 0.918  | 0.685 | 1.043, 0.852-1.277 |
|            |           |       | Cases    | 48 (11.650)  | 184 (44.660) | 180 (43.689) | 280 (33.981) | 544 (66.019) |        |       |                    |
|            |           |       |          | CC           | CT           | TT           | C            | T            |        |       |                    |
| rs2573356  | intron 14 | 0.490 | Controls | 118 (28.230) | 190 (45.455) | 110 (26.316) | 426 (50.957) | 410 (49.043) | 0.892  | 0.926 | 1.009, 0.833-1.223 |
|            |           |       | Cases    | 112 (27.184) | 194 (47.087) | 106 (25.728) | 418 (50.728) | 406 (49.272) |        |       |                    |
|            |           |       |          | GG           | GA           | AA           | G            | A            |        |       |                    |
| rs2819945  | intron 14 | 0.452 | Controls | 119 (28.469) | 221 (52.871) | 78 (18.660)  | 459 (54.904) | 377 (45.096) | 0.101  | 0.827 | 1.022, 0.842-1.240 |
|            |           |       | Cases    | 130 (31.553) | 188 (45.631) | 94 (22.816)  | 448 (54.369) | 376 (45.631) |        |       |                    |
|            |           |       |          | GG           | GA           | AA           | G            | A            |        |       |                    |
| rs11202059 | intron 14 | 0.476 | Controls | 106 (25.359) | 226 (54.067) | 86 (20.574)  | 438 (52.392) | 398 (47.608) | 0.064  | 0.479 | 0.933, 0.769-1.131 |
|            |           |       | Cases    | 128 (31.068) | 190 (46.117) | 94 (22.816)  | 446 (54.126) | 378 (45.874) |        |       |                    |
|            |           |       |          | CC           | CT           | TT           | C            | T            |        |       |                    |
| rs2819941  | intron 14 | 0.457 | Controls | 114 (27.273) | 226 (54.067) | 78 (18.660)  | 454 (54.306) | 382 (45.694) | 0.0002 | 0.001 | 1.402, 1.156-1.701 |
|            |           |       | Cases    | 94 (22.816)  | 190 (46.117) | 128 (31.068) | 378 (45.874) | 446 (54.126) |        |       |                    |

1  
2  
3  
4  
5  
6  
7  
8  
9  
10  
11  
12  
13  
14  
15  
16  
17  
18  
19  
20  
21  
22  
23  
24  
25  
26  
27  
28  
29  
30  
31  
32  
33  
34  
35  
36  
37  
38  
39  
40  
41  
42  
43  
44  
45  
46  
47  
48  
49

<sup>a</sup> p values for genotype frequency distribution. <sup>b</sup> p values for allele frequency distribution. <sup>c</sup> OR and 95%CI values for allele frequency distribution.  
<sup>\*</sup> P value is adjusted by Bonferroni correction and statistically significant results ( $P < 0.003$ ).  
All SNPs were found to be in Hardy-Weinberg equilibrium ( $p > 0.05$ ).

For peer review only

**Table 3** ANXA11 haplotype in block 1-4 frequencies and the results of their associations with risk of sarcoidosis

| Block | Haplotype | Cases(n, %)  | Controls(n, %) | Statistics |          |       |             |
|-------|-----------|--------------|----------------|------------|----------|-------|-------------|
|       |           |              |                | $\chi^2$   | <i>P</i> | OR    | 95%CI       |
| 1     | C - T     | 201 (48.786) | 212 (50.718)   | 0.310      | 0,578    | 0.926 | 0.705~1.215 |
|       | T - G     | 163 (39.563) | 160 (38.278)   | 0.144      | 0.104    | 1.056 | 0.199~1.395 |
|       | C - G     | 47 (11.408)  | 48 (11.483)    | 0.001      | 0.973    | 0.993 | 0.647~1.522 |
| 2     | C - T     | 210 (50.971) | 218 (52.153)   | 0.116      | 0.733    | 0.954 | 0.726~1.252 |
|       | T - C     | 117 (27.725) | 166 (39.713)   | 11.822     | 0.001    | 0.602 | 0.450~0.805 |
|       | C - C     | 82 (19.903)  | 31 (7.416)     | 27.507     | 0.0001   | 3.102 | 2.001~4.810 |
| 3     | C - T     | 208 (50.485) | 213 (50.957)   | 0.018      | 0.892    | 0.981 | 0.747~1.288 |
|       | T - C     | 139 (33.738) | 146 (34.928)   | 0.130      | 0.718    | 0.949 | 0.712~1.263 |
|       | C - C     | 63 (15.291)  | 59 (14.115)    | 0.229      | 0.632    | 1.098 | 0.748~1.613 |
| 4     | G - G -C  | 219 (53.155) | 190 (45.455)   | 4.923      | 0.027    | 1.362 | 1.036~1.789 |
|       | G - A - C | 185 (44.903) | 188 (44.876)   | 0.0001     | 0.997    | 0.758 | 0.712~1.311 |

\* *P* value is adjusted by Bonferroni correction and statistically significant results (*P* < 0.025 in block 1-3; *P* < 0.0167 in block 4).

1  
2  
3  
4  
5  
6  
7  
8  
9  
10  
11  
12  
13  
14  
15  
16  
17  
18  
19  
20  
21  
22  
23  
24  
25  
26  
27  
28  
29  
30  
31  
32  
33  
34  
35  
36  
37  
38  
39  
40  
41  
42  
43  
44  
45  
46  
47  
48  
49  
50  
51  
52  
53  
54  
55  
56  
57  
58  
59  
60

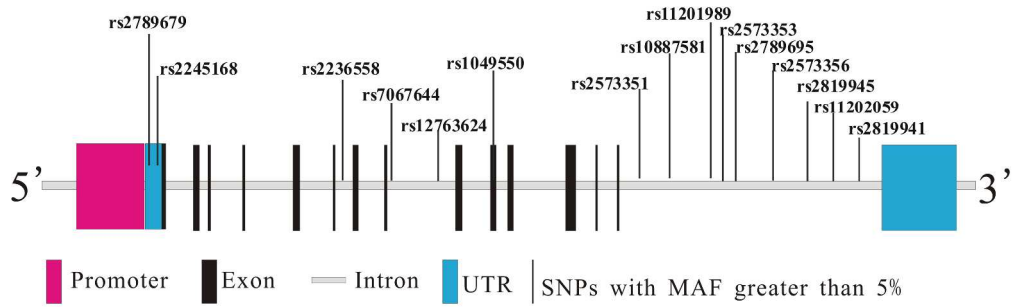

The structure of the human ANXA11 gene and ten SNPs located on the gene.



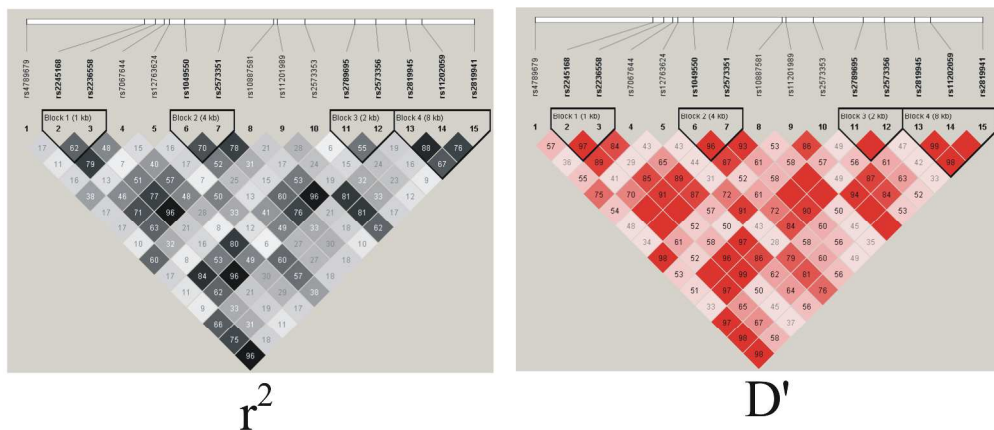

The LD plot of the fifteen SNPs in the ANXA11 gene. Values in squares are the pair - wise calculation of  $r^2$  (left) or  $D'$  (right). Black squares indicate  $r^2 = 1$  (i.e. perfect LD between a pair of SNPs). Empty squares indicate  $D' = 1$  (i.e. complete LD between a pair of SNPs).

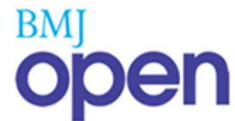

**Annexin A11 (ANXA11) gene polymorphisms are associated with sarcoidosis in a Han Chinese population - a case-control study**

|                                 |                                                           |
|---------------------------------|-----------------------------------------------------------|
| Journal:                        | <i>BMJ Open</i>                                           |
| Manuscript ID:                  | bmjopen-2013-004466.R1                                    |
| Article Type:                   | Research                                                  |
| Date Submitted by the Author:   | 11-Feb-2014                                               |
| Complete List of Authors:       | Zhang, LG<br>Xiao, ZJ<br>Shi, GC<br>J, Huang<br>Zhang, CX |
| <b>Primary Subject Heading</b>: | Infectious diseases                                       |
| Secondary Subject Heading:      | Genetics and genomics                                     |
| Keywords:                       | GENETICS, IMMUNOLOGY, INFECTIOUS DISEASES                 |
|                                 |                                                           |

SCHOLARONE™  
Manuscripts

1  
2  
3  
4 Annexin A11 (ANXA11) gene polymorphisms are associated with sarcoidosis in a Han  
5  
6 Chinese population - a case-control study  
7

8  
9 LG Zhang, ZJ Xiao\*, GC Shi, J Huang, CX Zhang

10  
11 Internal Medicine - Tuberculosist, First Hospital Affiliated to the Xinxiang Medical  
12  
13 College, Xinxiang, Henan, PR China  
14

15  
16 \*Corresponding author: Zhijian Xiao, Internal Medicine - Tuberculosisthe, First  
17  
18 Hospital Affiliated to the Xinxiang Medical College, Xinxiang, Henan, PR China  
19

20  
21 No.88 Jiankang Road, Weihui City, Henan, 463000, PR China  
22

23  
24 E-mail: zhangligongys@163.com  
25

26  
27 Tel: +86 0373 - 4402229 (office)  
28

29  
30 Fax: +86 0373 -4402251  
31

32  
33 **Key words:** Sarcoidosis; Annexin A11; Single-nucleotide polymorphism  
34

35  
36 Word count: 2909  
37  
38  
39  
40  
41  
42  
43  
44  
45  
46  
47  
48  
49  
50  
51  
52  
53  
54  
55  
56  
57  
58  
59  
60

## Abstract

**Objectives:** To further identify the single - nucleotide polymorphisms (SNPs) that contribute to the genetic susceptibility to sarcoidosis, we examined the potential association between sarcoidosis and fifteen SNPs of the ANXA11 gene.

**Design:** A case - control study.

**Setting:** A tuberculosis unit in a university hospital in China.

**Participants:** Participants included 412 patients with sarcoidosis and 418 healthy controls.

**Methods:** The selected SNPs were genotyped in cases and controls by using the MALDI - TOF in the MassARRAY system (Sequenom Inc., San Diego, CA, USA). Probes and primers were designed using the Assay Design Software (Sequenom, San Diego, CA, USA).

**Results:** The results showed that statistically significant differences were observed in the allelic or genotypic frequencies of the rs2789679, rs1049550 and rs2819941 in the ANXA11 gene. The frequency of the T allele in rs2789679 ( $P = 0.0003$ , OR = 0.70, 95%CI = 0.58 - 0.85), T allele in rs1049550 ( $P = 0.0007$ , OR = 0.62, 95%CI= 0.50 - 0.76) and the rs2819941 C allele frequency ( $P = 0.001$ , OR = 0.71, 95%CI = 0.59 - 0.87) in the patients with sarcoidosis was significantly lower than that in the controls. Comparison of genotype frequency distribution revealed significant differences between chest radiographic (CXR) stage I and stages II - IV for rs1049550. The significantly more CC genotype ( $P = 0.012$ ) were found in the patients with stages I sarcoidosis. Furthermore, strong linkage disequilibrium (LD) was observed in four

1  
2  
3  
4 blocks ( $D' > 0.9$ ). In block 2 (rs1049550-rs2573351), the T - C haplotype occurred  
5  
6 significantly less frequently ( $P = 0.001$ ), whereas the C - C haplotypes occurred more  
7  
8 frequently ( $P = 0.0001$ ).  
9

10  
11 **Conclusions:** These findings point to a role for ANXA11 gene polymorphisms in  
12  
13 sarcoidosis in a Han Chinese population, and may be informative for future genetic or  
14  
15 biological studies on sarcoidosis.  
16  
17  
18  
19  
20  
21  
22  
23  
24  
25  
26  
27  
28  
29  
30  
31  
32  
33  
34  
35  
36  
37  
38  
39  
40  
41  
42  
43  
44  
45  
46  
47  
48  
49  
50  
51  
52  
53  
54  
55  
56  
57  
58  
59  
60

## Article summary

### Article focus

1. The first genome - wide association study (GWAS) in sarcoidosis conducted in a German population has revealed that the rs1049550 (C > T, Arg230Cys) located in exon 10 were associated with sarcoidosis.
2. More studies should be performed to demonstrate the following item: whether these SNPs modulate the risk of sarcoidosis by themselves or whether they correlate with other causative SNPs and are repeated in other populations.
3. We hypothesize that common variants in the ANXA11 gene may significantly contribute to the predisposition to develop sarcoidosis in a Chinese Han population.

### Key messages

1. ANXA11 rs2789679 (3'UTR) was found to be associated with sarcoidosis.
2. ANXA11 rs1049550 (exon 10) was significantly associated with sarcoidosis.
3. Another significant association was observed for rs2819941 (intron 14).

### Strengths and limitations of this study

1. Functional SNPs in the promoter region, 5'- and 3'-UTR, exons of ANXA11 gene were systematically screened and homogeneity of the study subjects, representing the Han Chinese, is the main strength of the current study.
2. Functional characterization is the potential limitation of the study that could have further helped in proving the positive association observed for rs2789679 and rs1049550. The lack of correlation of serum ANXA11 levels are needed to investigate.

## INTRODUCTION

Sarcoidosis is a systemic autoimmune disease characterized by destructive, non-caseating epithelioid granulomatous lesions, with accumulated phagocytes and activated CD4<sup>+</sup> T helper type 1 lymphocytes<sup>1 2</sup>. The typical manifestations of sarcoidosis include bilateral hilar lymphadenopathy, pulmonary infiltration and ocular and skin lesions. The clinical course and prognosis of sarcoidosis are variable. The acute forms of sarcoidosis such as Löfgren's syndrome (LS) can resolve spontaneously in most cases. However, chronic pulmonary sarcoidosis may progress to lung fibrosis and eventually result in respiratory failure. Recent studies have demonstrated that sarcoidosis can occur in a pattern of family clustering, and its racial incidence is also different, suggesting that some genetic factors may contribute to the risk and severity of sarcoidosis<sup>1 3</sup>.

The Annexin gene family is involved in the etiology of several autoimmune and

1  
2  
3  
4 chronic diseases<sup>4,5</sup>. One member of the Annexin gene family, ANXA11, located on  
5  
6 chromosome 10q22.3, is involved in calcium signaling, apoptosis, vesicle trafficking,  
7  
8 cell growth and terminal phase of cell division<sup>5-7</sup>. In this context, the development  
9  
10 and maintenance of the granulomatous inflammation in sarcoidosis have been  
11  
12 repeatedly associated with the impaired apoptosis of activated inflammatory cells<sup>8,9</sup>.  
13  
14 In most patients with sarcoidosis, the early stages of this disease are characterized by  
15  
16 mononuclear cell alveolitis dominated by activated CD4<sup>+</sup> T cells and macrophages.  
17  
18 Between these cells, the uncoordinated interplay results in the formation of typical  
19  
20 non - caseating granulomas. The mechanism by which the granulomas resolve has not  
21  
22 been fully elucidated. However, it is generally assumed that the induction of apoptosis  
23  
24 and / or by the withdrawal of inflammatory cytokines participates in the  
25  
26 disappearance of granulomas<sup>10,11</sup>. In the patients with sarcoidosis, their peripheral  
27  
28 blood monocytes were characterized by apoptosis<sup>9</sup>.

29  
30  
31 In previous studies, case - control / family 'hypothesis - driven' studies and low  
32  
33 density linkage scans were used to identify genetic factors conferring the genetic  
34  
35 susceptibility to sarcoidosis<sup>12</sup>. Notably, the first genome - wide association study  
36  
37 (GWAS) in sarcoidosis conducted in a German population has recently revealed an  
38  
39 association: the leading rs2789679 SNP (single - nucleotide polymorphism) located in  
40  
41 the 3' - untranslated region (3' - UTR) and a common nonsynonymous SNP  
42  
43 (rs1049550, C > T, Arg230Cys) were associated with increased risk of sarcoidosis<sup>4,13</sup>.  
44  
45 This association has recently been supported by another report from the same  
46  
47 population<sup>14</sup>. Thus, more studies should be performed to demonstrate the following  
48  
49  
50  
51  
52  
53  
54  
55  
56  
57  
58  
59  
60



1  
2  
3  
4 item: whether these SNPs modulate the risk of sarcoidosis by themselves or whether  
5  
6 they correlate with other causative SNPs and are repeated in other populations. The  
7  
8 published sarcoidosis - association studies for ANXA11 are summarized in Table 1.  
9  
10 We hypothesize that common variants in the ANXA11 gene may significantly  
11  
12 contribute to the predisposition to develop sarcoidosis.  
13  
14

15  
16 In this study, we investigated fifteen loci in a Chinese population from He'nan  
17  
18 province (China) to verify the putative association between ANXA11 polymorphisms  
19  
20 and sarcoidosis.  
21  
22

## 23 **SUBJECTS AND METHODS**

### 24 **Subjects**

25  
26 Four hundred and twelve patients with sarcoidosis (mean  $\pm$  SD age:  $53.6 \pm 4.6$   
27  
28 years; 155 men and 257 women) were recruited from our hospital between May 2005  
29  
30 and March 2013. Sarcoidosis was diagnosed by the evidence of non - caseating  
31  
32 epitheloid cell granuloma in biopsy specimens and chest radiographic abnormalities.  
33  
34 Chronic sarcoidosis was defined as a disease over at least 2 years or at least two  
35  
36 episodes in a lifetime. A cute sarcoidosis was defined as one episode of acute  
37  
38 sarcoidosis which had totally resolved at the date of the examination. The control  
39  
40 group consisted of 418 unrelated healthy subjects (mean  $\pm$  SD age:  $54.2 \pm 5.3$  years;  
41  
42 160 men and 258 women) who underwent health examinations in the Medical  
43  
44 Examination Center of the First Affiliated Hospital of the Xinxiang Medical College  
45  
46 (Xinxiang, China) between Oct 2009 and Sept 2013. None of the individuals in the  
47  
48 control group had a history of lung diseases or showed any symptoms of the lung or  
49  
50  
51  
52  
53  
54  
55  
56  
57  
58  
59  
60

1  
2  
3  
4 other diseases by chest radiography or laboratory blood tests. Participants were  
5  
6 excluded if they: were taking other prescribed medications that could affect the  
7  
8 central nervous system; had a history of seizures, hematological diseases, or severe  
9  
10 liver or kidney impairment; or were pregnant. No familial relationship was known  
11  
12 between the study participants. The study was performed according to the Guidelines  
13  
14 of the Medical Ethical Committee of Xinxiang Medical College (Xinxiang, China).  
15  
16 Written informed consent was obtained from each participant in this study.  
17  
18  
19

### 20 21 **SNP selection**

22  
23 Tagging SNPs were selected from the catalogs of the International HapMap  
24  
25 Project. The rs2789679 and rs2245168 are located in 5'-UTR, rs2236558 in intron 6,  
26  
27 rs7067644 and rs12763624 in intron 8, rs1049550 in exon 10, rs2573351 in intron 13,  
28  
29 rs10887581, rs11201989, rs2573353, rs2789695, rs2573356, rs2819945, rs11202059  
30  
31 and rs2819941 in intron 14 (Figure 1). Marker selection was done according to  
32  
33 previous studies<sup>4 12 14 15</sup>, and preliminary analysis was performed using the HapMap  
34  
35 data and the following criteria. First, we examined tagSNPs in the Haploview (v4.2),  
36  
37 using the CHB population and a minor allele frequency cut - off (MAF)  $\geq 5\%$   
38  
39 (HapMap Data Release 27). We found that there were a total of 29 potential tagSNPs  
40  
41 in all. As a first screen of the most common SNPs in the sarcoidosis sample from an  
42  
43 Eastern Chinese Han population, a MAF  $\geq 20\%$  with pair - wise tagging and  $r^2 \geq 0.8$   
44  
45  
46  
47  
48  
49  
50  
51  
52  
53  
54  
55  
56  
57  
58  
59  
60  
16 was used as the cut - off when choosing tagSNPs. Second, the LD pattern of this  
gene was determined in the Chinese population using the preliminary data from the  
HapMap. Five LD blocks across the ANXA11 were defined using Haploview's

1  
2  
3  
4 'confidence intervals' method<sup>17 18</sup>. These SNPs were further analyzed in an  
5  
6 association study.  
7

### 8 9 **Genotyping**

10  
11 Peripheral blood was collected from a vein into a sterile tube coated with  
12  
13 ethylenediamine tetraacetic acid (EDTA). Plasma samples were stored at -20°C.  
14  
15 Genomic DNA was extracted from the frozen peripheral blood samples using a  
16  
17 QIAmp Blood Mini Kit (Qiagen Inc., Valencia, CA, USA) according to the  
18  
19 manufacturer's protocols. The selected SNPs were genotyped in cases and controls by  
20  
21 using the MALDI - TOF in the MassARRAY system (Sequenom Inc., San Diego, CA,  
22  
23 USA). Probes and primers were designed using the Assay Design Software  
24  
25 (Sequenom, San Diego, CA, USA). The completed genotyping reactions were spotted  
26  
27 onto a 384 well spectroCHIP (Sequenom) using the MassARRAY Nanodispenser  
28  
29 (Sequenom) and determined by the matrix - assisted laser desorption ionization time -  
30  
31 of - flight mass spectrometer. Genotype calling was performed in realtime with the  
32  
33 MassARRAY RT software version 3.0.0.4 and analyzed using the MassARRAY Typer  
34  
35 software version 3.4 (Sequenom).  
36  
37  
38  
39  
40  
41  
42  
43

### 44 **Statistical analysis**

45  
46 All data were analyzed using the SPSS 17.0 software (SPSS Inc., Chicago, IL,  
47  
48 USA). Hardy-Weinberg equilibrium were evaluated by Chi - square tests. Differences  
49  
50 between the cases and controls in the frequency of the alleles, genotypes and  
51  
52 haplotypes were evaluated by the Fisher's exact test or the Pearson Chi - square test.  
53  
54  
55 Unconditional logistic regression was used to calculate the odds ratio (OR) and 95%  
56  
57  
58  
59  
60

1  
2  
3  
4 confidence interval (CI) in independent association between each locus and the  
5  
6 presence of sarcoidosis. Generalized linear regression was used to evaluate the  
7  
8 interaction effects between gene and gender or age. Gender and age of subjects were  
9  
10 treated as covariants in binary logistic regression. *P* - value was calculated based on  
11  
12 codominant, dominant for the rare allele, heterosis and recessive for the rare allele  
13  
14 models of inheritance. The Bonferroni correction was used to adjust the test level  
15  
16 when multiple comparisons were conducted, and the *P* value was divided by the total  
17  
18 number of loci. Haplotype blocks were defined according to the criteria developed by  
19  
20 Gabriel et al.<sup>18</sup>. Pair - wise LD statistics ( $D'$  and  $r^2$ ) and haplotype frequency were  
21  
22 calculated, and haplotype blocks were constructed using the Haploview 4.0<sup>17</sup>. To  
23  
24 ensure that the LD blocks most closely reflect the population level LD patterns,  
25  
26 definition of the blocks were based on the control samples alone. The haplotype  
27  
28 frequencies were estimated using GENECOUNTING, which computes maximum -  
29  
30 likelihood estimates of haplotype frequencies from unknown phase data by utilizing  
31  
32 an expectation - maximization algorithm<sup>19-22</sup>. The significance of any haplotypic  
33  
34 association was evaluated using a likelihood ratio test, followed by permutation  
35  
36 testing that compared estimated haplotype frequencies in cases and controls<sup>19 21</sup>.  
37  
38  
39  
40  
41  
42  
43  
44  
45

## 46 RESULTS

47  
48 The genotype distribution of the fifteen polymorphisms was consistent with the  
49  
50 Hardy - Weinberg equilibrium ( $P > 0.05$ ). The analysis of strong LD in the patients  
51  
52 with sarcoidosis and healthy controls revealed that 2 SNPs (rs2245168, rs2236558), 2  
53  
54 SNPs (rs1049550, rs2573351), 2 SNPs (rs2789695, rs2573356) and 3 SNPs  
55  
56  
57  
58  
59  
60

1  
2  
3  
4 (rs2819945, rs11202059, rs2819941) were located in haplotype block 1, block 2,  
5  
6 block 3 and block 4 ( $D' > 0.9$ , Fig. 2). The genotype distribution, allelic frequencies,  
7  
8 and haplotypes in the patients with sarcoidosis and healthy controls are showed in  
9  
10 tables 2, table 4 and table 5.

11  
12  
13  
14 Comparison of genotype and allele frequency distribution revealed significant  
15  
16 differences between the patients with sarcoidosis and healthy controls for 3 SNPs:  
17  
18 rs2789679, rs1049550 and rs2819941. The frequency of the T allele in rs2789679 ( $P$   
19  
20 = 0.0003, OR = 0.70, 95%CI = 0.58 - 0.85), T allele in rs1049550 ( $P$  = 0.0007, OR =  
21  
22 0.62, 95%CI = 0.50 - 0.76) and the rs2819941 C allele frequency ( $P$  = 0.001, OR =  
23  
24 0.71, 95%CI = 0.59 - 0.87) in the patients with sarcoidosis was significantly lower  
25  
26 than that in the controls, and these differences remained statistically significant after  
27  
28 Bonferroni corrections. There were no interactions among rs2789679, rs1049550 and  
29  
30 rs2819941 ( $P > 0.05$ ).

31  
32  
33  
34  
35  
36 We performed an association analysis to determine whether the haplotype was  
37  
38 associated with the risk of sarcoidosis (Global  $P < 0.05$  in block 2 and block 3).  
39  
40 Compared with the healthy controls, the T - C haplotype occurred significantly less  
41  
42 frequently ( $P$  = 0.001) and the C - C haplotypes occurred more frequently ( $P$  = 0.0001)  
43  
44 in block 2 ( rs1049550 - rs2573351) in the patients with sarcoidosis.

45  
46  
47  
48  
49 To assess particular disease phenotypes, the patients with sarcoidosis were  
50  
51 divided into the subgroups according to their chest radiographic (CXR) stage. CXR  
52  
53 stage I (isolated bilateral hilar lymphadenopathy): N = 196; CXR stages II - IV  
54  
55 (infiltration of parenchyma): 167; CXR stage 0 (absence on pulmonary disease): N =  
56  
57  
58  
59  
60

1  
2  
3  
4 28; the information on CXR stage was not available for 21 patients. Comparison of  
5  
6 genotype frequency distribution revealed significant differences between stage I and  
7  
8 stages II - IV for rs1049550. The significantly more CC genotype ( $P = 0.012$ ) were  
9  
10 found in the patients with stage I sarcoidosis (table 3).  
11  
12

### 13 **DISCUSSION**

14  
15 A key step in linkage and association studies is to identify common risk variants  
16  
17 in different populations. To determine if common risk variants exist in distinct  
18  
19 populations, fifteen SNPs which span approximately 0.53 Mb of the ANXA11 gene,  
20  
21 were genotyped in samples from the patients with sarcoidosis and healthy controls in  
22  
23 a Chinese Han population. Recently, new sarcoidosis loci have been identified by  
24  
25 genome - wide association studies <sup>4 14</sup>. With the fast development of genome - wide  
26  
27 association studies, increasing number of susceptibility loci for sarcoidosis have been  
28  
29 reported in different populations <sup>4 14 15</sup>. However, these observations should be  
30  
31 confirmed in other genetically independent populations. In this study, we conducted  
32  
33 the first large genetic association study of the ANXA11 gene in a Chinese Han  
34  
35 population. The evidence of markers associated with sarcoidosis was presented, and  
36  
37 these markers were mapped to different locations in the ANXA11 gene (81897864 -  
38  
39 81951001). The association signals in the region were identified, and some  
40  
41 significantly associated haplotypes also appeared this region.  
42  
43  
44  
45  
46  
47  
48  
49  
50

51 Hoffman et al. reported an association between the T allele of the non -  
52  
53 synonymous SNP rs1049550 and significantly decreased risk of sarcoidosis in a  
54  
55 German population <sup>4</sup>. Similar results were also obtained in other two European  
56  
57  
58  
59  
60

1  
2  
3 populations<sup>14 15</sup>. As a part of the sarcoidosis GWAS done in Americans<sup>23</sup>, we further  
4  
5 confirmed this association in a Chinese Han population. In this study, the frequency of  
6  
7 ANXA11 rs1049550T allele was significantly lower in the patients with sarcoidosis  
8  
9 than that in the healthy controls. Comparison of stages II - IV, the significantly more  
10  
11 CC genotype was found in the patients with stages I sarcoidosis. The “protective”  
12  
13 effect of ANXA11 T allele increased with the number of its copies in the genotype,  
14  
15 which is consistent with the result obtained in the patients with sarcoidosis in a  
16  
17 German population<sup>4</sup>. Furthermore, the T allele carriers among the patients were  
18  
19 protected from infiltration of lung parenchyma (radiographic stages II-IV)<sup>15</sup>. We have  
20  
21 also demonstrated that rs1049550 is significant cross - ethnically at the gene level  
22  
23 after adjustment for the single SNP association tests performed. The mechanism by  
24  
25 which rs1049550 affects the susceptibility to sarcoidosis may be that the SNP may  
26  
27 affect the function of the ANXA11 protein rather than affect its expression. In humans,  
28  
29 the ANXA11 protein consists of an N - terminal proline - tyrosine - glycine (PYG) -  
30  
31 rich region, followed by four annexin core domains. The rs1049550 leads to an amino  
32  
33 - acid exchange (basic arginine to a polar cysteine) at the evolutionarily conserved  
34  
35 position 230 (R230C) in the first annexin domain, which is responsible for Ca<sup>2+</sup> -  
36  
37 dependent trafficking of the protein in the cell<sup>24</sup>.  
38  
39  
40  
41  
42  
43  
44  
45  
46  
47  
48

49 In the GWAS conducted by Hofmann et al<sup>4</sup>, the strongest association signal was  
50  
51 observed for rs2789679. This marker is located in the 3' - UTR of the ANXA11 gene.  
52  
53 The T allele had a frequency of 35% among the patients with sarcoidosis and 44% in  
54  
55 the healthy controls, with 13% of the patients with sarcoidosis and 19% of controls  
56  
57  
58  
59  
60

1  
2  
3  
4 being TT homozygous. Fine - mapping in the Black Women's Health Study (BWHS)  
5  
6 revealed rs2819941 to be the top SNP, associated with a nonsignificant ( $P = 0.06$ )  
7  
8 reduction in sarcoidosis risk (17% reduction per copy of the C-allele). In this case -  
9  
10 control association study, the frequency of the T allele in rs2789679 and the  
11  
12 rs2819941 C allele frequency in the patients with sarcoidosis was significantly lower  
13  
14 than that in the healthy controls. Several lines of evidence suggest that the observed  
15  
16 associations are unlikely to be an artifact. First, both the single - SNP and the  
17  
18 haplotype - based association analyses support the current finding. Second, population  
19  
20 stratification is an impossible reason, because all of our samples were from the same  
21  
22 geographical region. Finally, consistent results were obtained from two genetically  
23  
24 independent populations (Chinese Han and Europeans). Collectively, our results  
25  
26 confirmed the strong association between variations in the ANXA11 gene and  
27  
28 sarcoidosis, and suggest that ANXA11 represents a strong genetic risk factor for  
29  
30 sarcoidosis.  
31  
32  
33  
34  
35  
36  
37  
38

39 We further investigated the interaction among polymorphisms and observed  
40  
41 strong LD. The haplotype analysis revealed that significantly more C - C (block 2,  
42  
43 rs1049550 - rs2573351) and significantly fewer T - C haplotypes (block 2) were  
44  
45 found in the patients with sarcoidosis. These results indicated that the patients with C  
46  
47 - C (block 2) haplotypes of the ANXA11 gene were more prone to sarcoidosis.  
48  
49 Significantly higher frequencies of T - C haplotypes were detected in the healthy  
50  
51 controls than in the patients with sarcoidosis, suggesting that they may show a  
52  
53 protective effect against sarcoidosis. Our sample size can detect SNP and haplotype  
54  
55  
56  
57  
58  
59  
60



1  
2  
3  
4 associations with 90% and 85% power, respectively, at a false positive rate of 5%,  
5  
6 disease prevalence of 1%, disease allele / haplotype frequency of 0.05 / 0.03, and a  
7  
8 presumed odds ratio (OR) of 1.5. To some extent, this finding further supports a role  
9  
10 of ANXA11 polymorphisms in sarcoidosis, while ethnic group difference may exist.  
11  
12

13  
14 In conclusion, our study suggests a potential role of the ANXA11 SNPs and their  
15  
16 related haplotypes in the genetic susceptibility to sarcoidosis. Further studies are  
17  
18 needed to investigate how these SNPs affect the function of ANXA11.  
19  
20  
21  
22  
23  
24  
25  
26  
27  
28  
29  
30  
31  
32  
33  
34  
35  
36  
37  
38  
39  
40  
41  
42  
43

#### 44 **Funding**

45  
46 The project was supported by the Research and Development Foundation of  
47  
48 Science and Technology of Henan Province (2012k15).  
49  
50

#### 51 **Contributors**

52  
53 LG Zhang was involved in conception and design of the study, acquisition of  
54  
55 patient data, genotyping and drafted the paper. ZJ Xiao and GC Shi were involved in  
56  
57  
58  
59  
60

1  
2  
3 design of the study, genotyping and interpretation of results. J Huang and CX Zhang  
4  
5 were involved in design of the study, acquisition of patient data and interpretation of  
6  
7 result. All authors revised the draft paper.  
8  
9

### 10 11 **Competing interests**

12  
13 None.

### 14 15 **Patient consent**

16  
17 Obtained.

### 18 19 **Ethics approval**

20  
21 Ethics approval was provided by the First Hospital Affiliated to the Xinxiang  
22  
23 Medical College.  
24  
25

### 26 27 **Provenance and peer review**

28  
29 Not commissioned; externally peer reviewed.

### 30 31 **Data sharing statement**

32  
33 No additional data are available.  
34  
35  
36  
37  
38  
39  
40  
41  
42  
43  
44  
45  
46  
47  
48  
49  
50  
51  
52  
53  
54  
55  
56  
57  
58  
59  
60

## Reference

1. Iannuzzi MC, Rybicki BA, Teirstein AS. Sarcoidosis. *N Engl J Med* 2007; 357:2153-65.
2. Baughman RP, Lower EE, du Bois RM. Sarcoidosis. *Lancet* 2003;361:1111-8
3. Grunewald J. Review: role of genetics in susceptibility and outcome of sarcoidosis. *Semin Respir Crit Care Med* 2010;31:380-9.
4. Hofmann S, Franke A, Fischer A, *et al.* Genome-wide association study identifies ANXA11 as a new susceptibility locus for sarcoidosis. *Nat Genet* 2008;40:1103-6.
5. Gerke V, Moss SE. Annexins: from structure to function. *Physiol Rev* 2002;82:331-71.
6. Farnaes L, Ditzel HJ. Dissecting the cellular functions of annexin XI using recombinant human annexin XI-specific autoantibodies cloned by phage display. *J Biol Chem* 2003;278:33120-6.
7. Tomas A, Futter C, Moss SE. Annexin 11 is required for midbody formation and completion of the terminal phase of cytokinesis. *J Cell Biol* 2004;165:813-22.
8. Petzmann S, Maercker C, Markert E, *et al.* Enhanced proliferation and decreased apoptosis in lung lavage cells of sarcoidosis patients. *Sarcoidosis Vasc Diffuse Lung Dis* 2006;23:190-200
9. Dubaniewicz A, Trzonkowski P, Dubaniewicz-Wybieralska M, *et al.* Comparative

- 1  
2  
3  
4 analysis of mycobacterial heat shock proteins-induced apoptosis of peripheral  
5  
6 blood mononuclear cells in sarcoidosis and tuberculosis. *J Clin Immunol*  
7  
8 2006;26:243-50.  
9  
10  
11 10. Agostini C, Trentin L, Facco M, *et al.* Role of IL-15, IL-2, and their receptors in  
12  
13 the development of T cell alveolitis in pulmonary sarcoidosis. *J Immunol*  
14  
15 1996;157:910-8  
16  
17  
18 11. Jullien D, Sieling PA, Uyemura K, *et al.* IL-15, an immunomodulator of T cell  
19  
20 responses in intracellular infection. *J Immunol* 1997;158:800-6  
21  
22  
23  
24 12. Muller-Quernheim J, Schurmann M, Hofmann S, *et al.* Genetics of sarcoidosis.  
25  
26 *Clin Chest Med* 2008;29:391-414.  
27  
28  
29 13. Morais A, Lima B, Peixoto M, *et al.* Annexin A11 gene polymorphism (R230C  
30  
31 variant) and sarcoidosis in a Portuguese population. *Tissue antigens*  
32  
33 2013;82:186-91.  
34  
35  
36 14. Li Y, Pabst S, Kubisch C, *et al.* First independent replication study confirms the  
37  
38 strong genetic association of ANXA11 with sarcoidosis. *Thorax*  
39  
40 2010;65:939-40.  
41  
42  
43 15. Mrazek F, Stahelova A, Kriegova E, *et al.* Functional variant ANXA11 R230C:  
44  
45 true marker of protection and candidate disease modifier in sarcoidosis. *Genes*  
46  
47 *Immun* 2011;12:490-4.  
48  
49  
50  
51 16. de Bakker PI, Yelensky R, Pe'er I, *et al.* Efficiency and power in genetic  
52  
53 association studies. *Nat Genet* 2005;37:1217-23.  
54  
55  
56 17. Barrett JC, Fry B, Maller J, *et al.* Haploview: analysis and visualization of LD and  
57  
58  
59  
60

- haplotype maps. *Bioinformatics* 2005;21:263-5.
18. Gabriel SB, Schaffner SF, Nguyen H, *et al*. The structure of haplotype blocks in the human genome. *Science* 2002;296:2225-9.
19. Curtis D, Knight J, Sham PC. Program report: GENECOUNTING support programs. *Ann Hum Genet* 2006;70:277-9.
20. Zhao JH, Curtis D, Sham PC. Model-free analysis and permutation tests for allelic associations. *Hum Hered* 2000;50:133-9.
21. Zhao JH, Lissarrague S, Essioux L, *et al*. GENECOUNTING: haplotype analysis with missing genotypes. *Bioinformatics* 2002;18:1694-5
22. Zhao JH, Sham PC. Generic number systems and haplotype analysis. *Comput Methods Programs Biomed* 2003;70:1-9
23. Levin AM, Iannuzzi MC, Montgomery CG, *et al*. Association of ANXA11 genetic variation with sarcoidosis in African Americans and European Americans. *Genes Immun* 2013;14:13-8.
24. Tomas A, Moss SE. Calcium- and cell cycle-dependent association of annexin 11 with the nuclear envelope. *J Biol Chem* 2003;278:20210-6.

### Figure Legend

**Fig. 1** The structure of the human ANXA11 gene and 15 SNPs located on the gene.

**Fig. 2** The LD plot of the fifteen SNPs in the ANXA11 gene. Values in squares are the pair-wise calculation of  $r^2$  (left) or  $D'$  (right). Black squares indicate  $r^2 = 1$  (i.e. perfect

LD between a pair of SNPs). Empty squares indicate  $D' = 1$  (i.e. complete LD between a pair of SNPs).

**Table 1** Summary of all published sarcoidosis-association studies for ANXA11

| Study           | Population   |         | Type of Study | Sample Size (n) |         | Number of SNPs typed | Positive SNPs                                     |
|-----------------|--------------|---------|---------------|-----------------|---------|----------------------|---------------------------------------------------|
|                 | Ethnic group | Country |               | Sarcoidosis     | Control |                      |                                                   |
| Hofmann S, 2008 | Caucasian    | Germany | Case-control  | 499             | 490     | GWAS                 | rs27896<br>79,<br>rs70915<br>65,<br>rs10495<br>50 |
| Mrazek F, 2011  | Caucasian    | Czech   | Case-control  | 245             | 254     | 1                    | rs10495<br>50                                     |
| Cozier YC, 2012 | Caucasian    | America | Case-control  | 486             | 943     | 10p12-10q22          | rs27896<br>79,<br>rs28199<br>41                   |
| Li Y, 2013      | Caucasian    | Germany | Case-control  | 325             | 364     | 1                    | rs10495<br>50                                     |

|                |           |            |              |      |      |    |           |
|----------------|-----------|------------|--------------|------|------|----|-----------|
| Levin AM, 2013 | Caucasian | American   | Case-control | 1689 | 1252 | 25 | rs1049550 |
| Morais A, 2013 | Caucasian | Portuguese | Case-control | 208  | 197  | 1  | rs1049550 |

**Table 2** Genotypic and allelic frequencies of ANXA11 polymorphisms in the controls and patients with sarcoidosis

| Variable | Controls (n=418) |           | P-value <sup>a</sup> | OR, 95% CI      | Sarcoidosis (n=412) |           | P-value <sup>a</sup> | OR, 95% CI |                 |
|----------|------------------|-----------|----------------------|-----------------|---------------------|-----------|----------------------|------------|-----------------|
|          | N, %             | N, %      |                      |                 | N, %                | N, %      |                      |            |                 |
| rs278    |                  |           | 0.00                 |                 | rs108               |           | 0.2                  |            |                 |
| 9679     |                  |           | 07                   |                 | 8758                |           | 90                   |            |                 |
|          |                  |           |                      |                 | 1                   |           |                      |            |                 |
| AA       | 79, 18.9         | 132, 32.0 | 0.00                 | 0.49, 0.36-0.68 | TT                  | 114, 27.3 | 96, 23.3             | 0.190      | 1.23, 0.90-1.69 |
| AT       | 225, 53.8        | 186, 45.2 | 0.01                 | 1.42, 1.08-1.87 | TC                  | 190, 45.5 | 208, 50.5            | 0.148      | 0.82, 0.62-1.08 |

|  |        |      |      |      |           |        |      |      |         |
|--|--------|------|------|------|-----------|--------|------|------|---------|
|  |        |      |      |      |           |        |      |      | 07      |
|  |        |      |      |      |           |        |      |      | 1.06,   |
|  | TT     | 114, | 94,  | 0.14 | 1.27,     | CC     | 114, | 108, | 0.7     |
|  |        | 27.3 | 22.8 | 0    | 0.93-1.74 |        | 27.3 | 26.2 | 29      |
|  |        |      |      |      |           |        |      |      | 44      |
|  | Per T  | 383, | 450, | 0.00 | 0.70,     | Per C  | 418, | 424, | 0.5     |
|  | allele | 45.8 | 54.6 | 03   | 0.58-0.85 | allele | 50.0 | 51.5 | 83      |
|  |        |      |      |      |           |        |      |      | 7-1.29  |
|  | rs224  |      |      | 0.92 |           | rs112  |      |      | 0.1     |
|  | 5168   |      |      | 0    |           | 0198   |      |      | 44      |
|  |        |      |      |      |           | 9      |      |      |         |
|  | CC     | 156, | 150, | 0.79 | 1.04,     | GG     | 130, | 128, | 0.9     |
|  |        | 37.3 | 36.4 | 1    | 0.74-1.38 |        | 31.1 | 31.1 | 95      |
|  |        |      |      |      |           |        |      |      | 1.00,   |
|  |        |      |      |      |           |        |      |      | 0.75-1. |
|  |        |      |      |      |           |        |      |      | 34      |
|  | CT     | 200, | 197, | 0.95 | 0.99,     | GC     | 218, | 194, | 0.1     |
|  |        | 47.9 | 47.8 | 5    | 0.76-1.30 |        | 52.2 | 47.1 | 41      |
|  |        |      |      |      |           |        |      |      | 1.23,   |
|  |        |      |      |      |           |        |      |      | 0.93-1. |
|  |        |      |      |      |           |        |      |      | 62      |
|  | TT     | 62,  | 65,  | 0.78 | 0.95,     | CC     | 70,  | 90,  | 0.0     |
|  |        | 14.8 | 15.8 | 1    | 0.65-1.39 |        | 16.8 | 21.9 | 60      |
|  |        |      |      |      |           |        |      |      | 0.71,   |
|  |        |      |      |      |           |        |      |      | 0.50-1. |
|  |        |      |      |      |           |        |      |      | 01      |
|  | Per T  | 324, | 327, | 0.69 | 1.04,     | Per C  | 358, | 374, | 0.2     |
|  | allele | 38.8 | 39.7 | 8    | 0.85-1.27 | allele | 42.8 | 45.4 | 9       |
|  |        |      |      |      |           |        |      |      | 1.11,   |
|  |        |      |      |      |           |        |      |      | 0.91-1. |
|  |        |      |      |      |           |        |      |      | 35      |
|  | rs223  |      |      | 0.17 |           | rs257  |      |      | 0.9     |
|  | 6558   |      |      | 2    |           | 3353   |      |      | 18      |
|  |        |      |      |      |           |        |      |      |         |
|  | GG     | 118, | 104, | 0.72 | 1.06,     | CC     | 178, | 176, | 0.9     |
|  |        | 28.2 | 25.2 |      | 0.77-1.45 |        | 42.6 | 42.7 | 57      |
|  |        |      |      |      |           |        |      |      | 0.99,   |
|  |        |      |      |      |           |        |      |      | 0.75-1. |
|  |        |      |      |      |           |        |      |      | 31      |
|  | TG     | 190, | 214, | 0.06 | 0.77,     | CA     | 196, | 192, | 0.9     |
|  |        | 45.5 | 51.9 | 0    | 0.59-1.01 |        | 46.9 | 46.6 | 21      |
|  |        |      |      |      |           |        |      |      | 1.01,   |
|  |        |      |      |      |           |        |      |      | 0.77-1. |
|  |        |      |      |      |           |        |      |      | 33      |
|  | TT     | 110, | 94,  | 0.07 | 1.33,     | AA     | 44,  | 44,  | 0.9     |
|  |        | 26.3 | 22.8 | 3    | 0.97-1.82 |        | 10.5 | 10.7 | 41      |
|  |        |      |      |      |           |        |      |      | 0.98,   |
|  |        |      |      |      |           |        |      |      | 0.63-1. |
|  |        |      |      |      |           |        |      |      | 53      |
|  | Per T  | 410, | 402, | 0.91 | 0.99,     | Per A  | 284, | 280, | 0.9     |
|  | allele | 49.0 | 48.8 | 7    | 0.82-1.20 | allele | 34.0 | 34.0 | 97      |
|  |        |      |      |      |           |        |      |      | 1.00,   |
|  |        |      |      |      |           |        |      |      | 0.82-1. |
|  |        |      |      |      |           |        |      |      | 23      |
|  | rs706  |      |      | 0.17 |           | rs278  |      |      | 0.9     |
|  | 7644   |      |      | 3    |           | 9695   |      |      | 18      |
|  |        |      |      |      |           |        |      |      |         |
|  | AA     | 152, | 176, | 0.05 | 0.76,     | TT     | 178, | 180, | 0.7     |
|  |        | 36.4 | 42.7 | 9    | 0.58-1.01 |        | 42.6 | 34.0 | 40      |
|  |        |      |      |      |           |        |      |      | 0.95,   |
|  |        |      |      |      |           |        |      |      | 0.73-1. |
|  |        |      |      |      |           |        |      |      | 26      |
|  | GA     | 206, | 182, | 0.13 | 1.23,     | CT     | 188, | 184, | 0.9     |
|  |        |      |      |      |           |        |      |      | 1.01,   |



|    |        |      |      |      |           |        |      |      |     |         |
|----|--------|------|------|------|-----------|--------|------|------|-----|---------|
| 1  |        |      |      |      |           |        |      |      |     |         |
| 2  |        |      |      |      |           |        |      |      |     |         |
| 3  |        | 49.3 | 44.2 | 7    | 0.94-1.68 |        | 45.0 | 44.7 | 20  | 0.77-1. |
| 4  |        |      |      |      |           |        |      |      |     | 33      |
| 5  |        |      |      |      |           |        |      |      |     | 1.08,   |
| 6  |        | 60,  | 54,  | 0.59 | 1.11,     |        | 52,  | 48,  | 0.7 | 0.71-1. |
| 7  | GG     | 14.4 | 13.1 | 7    | 0.75-1.65 | CC     | 12.4 | 11.7 | 3   | 64      |
| 8  |        |      |      |      |           |        |      |      |     | 0.96,   |
| 9  |        |      |      |      |           |        |      |      |     | 0.78-1. |
| 10 | Per G  | 326, | 290, | 0.10 | 0.85,     | Per C  | 292, | 280, | 0.6 | 17      |
| 11 | allele | 38.0 | 35.2 | 9    | 0.70-1.04 | allele | 34.9 | 34.0 | 9   |         |
| 12 |        |      |      |      |           |        |      |      |     |         |
| 13 |        |      |      |      |           |        |      |      |     |         |
| 14 | rs127  |      |      | 0.11 |           | rs257  |      |      | 0.8 |         |
| 15 | 63624  |      |      | 8    |           | 3356   |      |      | 92  |         |
| 16 |        |      |      |      |           |        |      |      |     | 1.05,   |
| 17 | TT     | 126, | 150, | 0.00 | 0.68,     | CC     | 118, | 112, | 0.7 | 0.78-1. |
| 18 |        | 75.6 | 36.4 | 8    | 0.51-0.91 |        | 28.2 | 27.2 | 42  | 43      |
| 19 |        |      |      |      |           |        |      |      |     | 0.94,   |
| 20 | CT     | 216, | 186, | 0.05 | 1.30,     | CT     | 190, | 194, | 0.6 | 0.71-1. |
| 21 |        | 51.7 | 45.2 | 9    | 0.99-1.71 |        | 45.5 | 47.1 | 39  | 23      |
| 22 |        |      |      |      |           |        |      |      |     |         |
| 23 |        |      |      |      |           |        |      |      |     | 1.03,   |
| 24 | CC     | 76,  | 76,  | 0.41 | 1.16,     | TT     | 110, | 106, | 0.8 | 0.76-1. |
| 25 |        | 18.2 | 18.5 | 1    | 0.81-1.67 |        | 26.3 | 25.7 | 43  | 41      |
| 26 |        |      |      |      |           |        |      |      |     | 0.99,   |
| 27 | Per C  | 368, | 338, | 0.21 | 0.88,     | Per T  | 410, | 406, | 0.9 | 0.82-1. |
| 28 | allele | 44.0 | 41.0 | 6    | 0.73-1.08 | allele | 49.0 | 49.3 | 26  | 20      |
| 29 |        |      |      |      |           |        |      |      |     |         |
| 30 |        |      |      |      |           |        |      |      |     |         |
| 31 |        |      |      |      |           |        |      |      |     |         |
| 32 |        |      |      |      |           |        |      |      |     |         |
| 33 | rs104  |      |      | 0.00 |           | rs281  |      |      | 0.1 |         |
| 34 | 9550   |      |      | 02   |           | 9945   |      |      | 01  |         |
| 35 |        |      |      |      |           |        |      |      |     | 0.85,   |
| 36 | CC     | 154, | 208, | 0.00 | 0.57,     | GG     | 119, | 130, | 0.2 | 0.63-1. |
| 37 |        | 36.8 | 50.5 | 07   | 0.43-0.75 |        | 28.5 | 31.6 | 94  | 15      |
| 38 |        |      |      |      |           |        |      |      |     | 1.35,   |
| 39 | CT     | 190, | 170, | 0.22 | 1.19,     | GA     | 221, | 188, | 0.0 | 1.03-1. |
| 40 |        | 45.5 | 41.3 | 1    | 0.90-1.56 |        | 52.9 | 45.6 | 30  | 78      |
| 41 |        |      |      |      |           |        |      |      |     | 0.78,   |
| 42 | TT     | 74,  | 34,  | 0.00 | 2.39,     | AA     | 78,  | 94,  | 0.1 | 0.55-1. |
| 43 |        | 17.7 | 8.3  | 08   | 1.55-3.68 |        | 18.7 | 22.8 | 38  | 09      |
| 44 |        |      |      |      |           |        |      |      |     | 1.02,   |
| 45 | Per T  | 338, | 238, | 0.00 | 0.60,     | Per A  | 377, | 376, | 0.8 | 0.84-1. |
| 46 | allele | 40.4 | 28.8 | 07   | 0.49-0.73 | allele | 45.1 | 45.6 | 27  | 24      |
| 47 |        |      |      |      |           |        |      |      |     |         |
| 48 |        |      |      |      |           |        |      |      |     |         |
| 49 |        |      |      |      |           |        |      |      |     |         |
| 50 |        |      |      |      |           |        |      |      |     |         |
| 51 |        |      |      |      |           |        |      |      |     |         |
| 52 | rs257  |      |      | 0.43 |           | rs112  |      |      | 0.0 |         |
| 53 | 3351   |      |      | 7    |           | 0205   |      |      | 64  |         |
| 54 |        |      |      |      |           | 9      |      |      |     |         |
| 55 |        |      |      |      |           |        |      |      |     |         |
| 56 | TT     | 120, | 104, | 0.26 | 1.19,     | GG     | 106, | 128, | 0.0 | 0.75,   |
| 57 |        | 28.7 | 25.2 | 3    | 0.88-1.62 |        | 25.4 | 31.1 | 67  | 0.56-1. |
| 58 |        |      |      |      |           |        |      |      |     |         |
| 59 |        |      |      |      |           |        |      |      |     |         |
| 60 |        |      |      |      |           |        |      |      |     |         |

|  |        |      |      |      |           |        |      |      |           |
|--|--------|------|------|------|-----------|--------|------|------|-----------|
|  |        |      |      |      |           |        |      |      | 02        |
|  |        |      |      |      |           |        |      |      | 1.38,     |
|  | CT     | 202, | 216, | 0.23 | 0.85,     | GA     | 226, | 190, | 0.0       |
|  |        | 48.3 | 52.4 | 8    | 0.65-1.12 |        | 54.1 | 46.1 | 21        |
|  |        |      |      |      |           |        |      |      | 1.05-1.81 |
|  |        |      |      |      |           |        |      |      | 0.88,     |
|  | CC     | 96,  | 92,  | 0.82 | 1.04,     | AA     | 86,  | 94,  | 0.4       |
|  |        | 23.0 | 22.3 | 6    | 0.75-1.44 |        | 20.6 | 22.8 | 29        |
|  |        |      |      |      |           |        |      |      | 0.63-1.22 |
|  | Per C  | 394, | 400, | 0.56 | 1.06,     | Per A  | 398, | 378, | 0.4       |
|  | allele | 47.1 | 48.5 | 4    | 0.87-1.28 | allele | 47.6 | 45.9 | 79        |
|  |        |      |      |      |           |        |      |      | 0.93,     |
|  |        |      |      |      |           |        |      |      | 0.77-1.13 |
|  | rs281  |      |      | 0.00 |           |        |      |      |           |
|  | 9941   |      |      | 02   |           |        |      |      |           |
|  | CC     | 114, | 94,  | 0.14 | 1.27,     |        |      |      |           |
|  |        | 27.3 | 22.8 | 1    | 0.93-1.74 |        |      |      |           |
|  | CT     | 226, | 190, | 0.02 | 1.38,     |        |      |      |           |
|  |        | 54.1 | 46.1 | 1    | 1.05-1.81 |        |      |      |           |
|  | TT     | 78,  | 128, | 0.00 | 0.51,     |        |      |      |           |
|  |        | 18.7 | 31.1 | 04   | 0.37-0.70 |        |      |      |           |
|  | Per T  | 382, | 446, | 0.00 | 0.71,     |        |      |      |           |
|  | allele | 45.7 | 54.1 | 1    | 0.59-0.87 |        |      |      |           |

<sup>a</sup> P-value was calculated by 2 × 3 and 2 × 2 chi-squared tests based on codominant, dominant for the rare allele, heterosis and recessive for the rare allele models of inheritance.

Alpha value is adjusted by Bonferroni correction and statistically significant results (P<0.003)

1  
2  
3  
4  
5  
6  
7  
8  
9  
10  
11  
12  
13  
14  
15  
16  
17  
18  
19  
20  
21  
22  
23  
24  
25  
26  
27  
28  
29  
30  
31  
32  
33  
34  
35  
36  
37  
38  
39  
40  
41  
42  
43  
44  
45  
46  
47  
48  
49

For peer review only

**Table 3 Chest radiographic (CXR) stages of sarcoidosis patients by genotype of rs2789679, rs1049550 and rs2819941**

| Stages         | rs2789679 (n, %) |           |           |            | rs1049550* (n, %) |           |           | rs2819941 (n, %) |           |  |
|----------------|------------------|-----------|-----------|------------|-------------------|-----------|-----------|------------------|-----------|--|
|                | AA               | AT        | TT        | CC         | CT                | TT        | CC        | CT               | TT        |  |
| stage I        | 59 (30.1)        | 92 (47.0) | 45 (23.0) | 101 (51.5) | 82 (41.8)         | 13 (6.6)  | 47 (25.0) | 88 (44.9)        | 61 (31.1) |  |
| stages II - IV | 46 (27.6)        | 75 (44.9) | 46 (27.6) | 72 (43.1)  | 68 (40.7)         | 27 (16.2) | 41 (24.6) | 73 (43.7)        | 53 (31.7) |  |
| $\chi^2, P$    | 1.041, 0.594     |           |           |            | 8.807, 0.012      |           |           | 0.052, 0.975     |           |  |

\*  $P$  values for genotype frequency distribution ( $P < 0.05$ ).

1  
2  
3  
4 1 **Table 4** ANXA11 haplotype in block 2 frequencies and the results of their associations with risk  
5  
6 2 of sarcoidosis  
7  
8  
9 3

| Haplotype |           |           | Genecounting (frequency %) |          |                              |                              |
|-----------|-----------|-----------|----------------------------|----------|------------------------------|------------------------------|
| ID        | rs1049550 | rs2573351 | Cases                      | Controls | <i>P</i> -value <sup>a</sup> | Global <i>P</i> <sup>b</sup> |
| HAP1      | T         | C         | 27.7                       | 39.7     | 0.001                        | 0.003                        |
| HAP2      | C         | C         | 19.9                       | 7.4      | 0.0001                       |                              |
| HAP3      | C         | T         | 50.5                       | 51.0     | 0.892                        |                              |

4 <sup>a</sup> Based on 10,000 permutations.

5 <sup>b</sup> Based on comparison of frequency distribution of all haplotypes for the combination of SNPs.

**Table 5** ANXA11 haplotype in block 3 frequencies and the results of their associations with risk of sarcoidosis

| Haplotype |           |           | Genecounting (frequency %) |          |                              |                              |
|-----------|-----------|-----------|----------------------------|----------|------------------------------|------------------------------|
| ID        | rs2789695 | rs2573356 | Cases                      | Controls | <i>P</i> -value <sup>a</sup> | Global <i>P</i> <sup>b</sup> |
| HAP1      | C         | T         | 33.7                       | 34.9     | 0.718                        | 0.045                        |
| HAP2      | T         | T         | 15.3                       | 14.1     | 0.632                        |                              |
| HAP2      | T         | T         | 15.6                       | 14.1     | 0.565                        |                              |

<sup>a</sup> Based on 10,000 permutations.

<sup>b</sup> Based on comparison of frequency distribution of all haplotypes for the combination of SNPs.

1  
2  
3  
4 1 **Annexin A11 (ANXA11) gene polymorphisms are associated with sarcoidosis in a**  
5  
6 2 **Han Chinese population**  
7

8  
9 3 LG Zhang, ZJ Xiao\*, GC Shi, J Huang, CX Zhang

10  
11 4 Internal Medicine - Tuberculosist, First Hospital Affiliated to the Xinxiang Medical  
12  
13 5 College, Xinxiang, Henan, PR China

14  
15  
16 6 \*Corresponding author: Zhijian Xiao, Internal Medicine - Tuberculosisthe, First  
17  
18 7 Hospital Affiliated to the Xinxiang Medical College, Xinxiang, Henan, PR China

19  
20  
21 8 No.88 Jiankang Road, Weihui City, Henan, 463000, PR China

22  
23  
24 9 E-mail: zhangligongys@163.com

25  
26 10 Tel: +86 0373 - 4402229 (office)

27  
28  
29 11 Fax: +86 0373 -4402251

30  
31 12 **Key words:** Sarcoidosis; Annexin A11; Single-nucleotide polymorphism

32  
33  
34 13 Word count: 2909

35  
36  
37 14

1  
2  
3  
4 **Abstract**

5  
6 **Objectives:** To further identify the single - nucleotide polymorphisms (SNPs) that  
7  
8  
9  
10  
11  
12  
13  
14  
15  
16  
17  
18  
19  
20  
21  
22  
23  
24  
25  
26  
27  
28  
29  
30  
31  
32  
33  
34  
35  
36  
37  
38  
39  
40  
41  
42  
43  
44  
45  
46  
47  
48  
49  
50  
51  
52  
53  
54  
55  
56  
57  
58  
59  
60  
3 contribute to the genetic susceptibility to sarcoidosis, we examined the potential  
4 association between sarcoidosis and fifteen SNPs of the ANXA11 gene.

5 **Design:** A case - control study.

6 **Setting:** A tuberculosis unit in a university hospital in China.

7 **Participants:** Participants included 412 patients with sarcoidosis and 418 healthy  
8  
9  
10  
11  
12  
13  
14  
15  
16  
17  
18  
19  
20  
21  
22  
23  
24  
25  
26  
27  
28  
29  
30  
31  
32  
33  
34  
35  
36  
37  
38  
39  
40  
41  
42  
43  
44  
45  
46  
47  
48  
49  
50  
51  
52  
53  
54  
55  
56  
57  
58  
59  
60  
8 controls.

9 **Methods:** The selected SNPs were genotyped in cases and controls by using the  
10  
11  
12  
13  
14  
15  
16  
17  
18  
19  
20  
21  
22  
23  
24  
25  
26  
27  
28  
29  
30  
31  
32  
33  
34  
35  
36  
37  
38  
39  
40  
41  
42  
43  
44  
45  
46  
47  
48  
49  
50  
51  
52  
53  
54  
55  
56  
57  
58  
59  
60  
MALDI - TOF in the MassARRAY system (Sequenom Inc., San Diego, CA, USA).  
Probes and primers were designed using the Assay Design Software (Sequenom, San  
Diego, CA, USA).

13 **Results:** The results showed that statistically significant differences were observed in  
14  
15  
16  
17  
18  
19  
20  
21  
22  
15 the allelic or genotypic frequencies of the rs2789679, rs1049550 and rs2819941 in the  
16  
17  
18  
19  
20  
21  
22  
ANXA11 gene. The frequency of the T allele in rs2789679 ( $P = 0.0003$ , OR = 0.70,  
95%CI = 0.58 - 0.85), T allele in rs1049550 ( $P = 0.0007$ , OR = 0.62, 95%CI= 0.50 -  
0.76) and the rs2819941 C allele frequency ( $P = 0.001$ , OR = 0.71, 95%CI = 0.59 -  
0.87) in the patients with sarcoidosis was significantly lower than that in the controls.  
The frequency of the T allele in rs2789679 ( $\chi^2 = 12.849$ ,  $P = 0.0003$ , OR = 0.703,  
95%CI = 0.579 - 0.852), T allele in rs1049550 ( $\chi^2 = 24.420$ ,  $P = 0.0007$ , OR = 0.617,  
95%CI = 0.503 - 0.758) and the rs2819941 C allele frequency ( $\chi^2 = 11.803$ ,  $P = 0.001$ ,  
OR = 0.713, 95%CI = 0.588 - 0.865) in the patients with sarcoidosis was significantly



1  
2  
3  
4 1 ~~lower than that in the controls.~~ Comparison of genotype frequency distribution  
5  
6 2 revealed significant differences between chest radiographic (CXR) stage I and stages  
7  
8  
9 3 II - IV for rs1049550. The significantly more CC genotype ( $P = 0.012$ ) were found in  
10  
11 4 the patients with stages I sarcoidosis. Furthermore, strong linkage disequilibrium (LD)  
12  
13  
14 5 was observed in ~~two~~four blocks ( $D' > 0.9$ ). In block 2 (rs1049550-rs2573351), the T -  
15  
16 6 C haplotype occurred significantly less frequently ( $P = 0.001$ ), whereas the C - C  
17  
18  
19 7 haplotypes occurred more frequently ( $P = 0.0001$ ).

20  
21 8 **Conclusions:** These findings point to a role for ANXA11 gene polymorphisms in  
22  
23  
24 9 sarcoidosis in a Han Chinese population, and may be informative for future genetic or  
25  
26  
27 10 biological studies on sarcoidosis.

28  
29 11  
30  
31  
32  
33  
34  
35  
36  
37  
38  
39  
40  
41  
42  
43  
44  
45  
46  
47  
48  
49  
50  
51  
52  
53  
54  
55  
56  
57  
58  
59  
60

1  
2  
3  
4 **1 Article summary**

5  
6 **2 Article focus**

7  
8  
9 3 1. The first genome - wide association study (GWAS) in sarcoidosis conducted in a  
10 German population has revealed that the rs1049550 (C > T, Arg230Cys) located in  
11 exon 10 were associated with sarcoidosis.  
12

13  
14  
15  
16 6 2. More studies should be performed to demonstrate the following item: whether these  
17 SNPs modulate the risk of sarcoidosis by themselves or whether they correlate with  
18 other causative SNPs and are repeated in other populations.  
19

20  
21  
22 9 3. We hypothesize that common variants in the ANXA11 gene may significantly  
23 contribute to the predisposition to develop sarcoidosis in a Chinese Han population.  
24  
25  
26  
27

28  
29 **11 Key messages**

30  
31 12 1. ANXA11 rs2789679 (3'UTR) was found to be associated with sarcoidosis.

32  
33 13 2. ANXA11 rs1049550 (exon 10) was significantly associated with sarcoidosis.

34  
35 14 3. Another significant association was observed for rs2819941 (intron 14).  
36  
37  
38

39 **15 Strengths and limitations of this study**

40  
41 16 1. Functional SNPs in the promoter region, 5'- and 3'-UTR, exons of ANXA11 gene  
42 were systematically screened and homogeneity of the study subjects, representing the  
43 Han Chinese, is the main strength of the current study.  
44  
45  
46  
47

48  
49 19 2. Functional characterization is the potential limitation of the study that could have  
50 further helped in proving the positive association observed for rs2789679 and  
51 rs1049550. The lack of correlation of serum ANXA11 levels are needed to  
52  
53  
54  
55  
56  
57 investigate.  
58  
59  
60

~~The lack of correlation of serum ANXA11 levels and sample size are other limitations.~~

### INTRODUCTION

Sarcoidosis is a systemic autoimmune disease characterized by destructive, non-caseating epithelioid granulomatous lesions, with accumulated phagocytes and activated CD4<sup>+</sup> T helper type 1 lymphocytes<sup>1 2</sup>. The typical manifestations of sarcoidosis include bilateral hilar lymphadenopathy, pulmonary infiltration and ocular and skin lesions. The clinical course and prognosis of sarcoidosis are variable. The acute forms of sarcoidosis such as Löfgren's syndrome (LS) can resolve spontaneously in most cases. However, chronic pulmonary sarcoidosis may progress to lung fibrosis and eventually result in respiratory failure. Recent studies have demonstrated that sarcoidosis can occur in a pattern of family clustering, and its racial incidence is also different, suggesting that some genetic factors may contribute to the risk and severity of sarcoidosis<sup>13</sup>.

The Annexin gene family is involved in the etiology of several autoimmune and chronic diseases<sup>4 5</sup>. One member of the Annexin gene family, ANXA11, located on chromosome 10q22.3, is involved in calcium signaling, apoptosis, vesicle trafficking, cell growth and terminal phase of cell division<sup>5-7</sup>. In this context, the development and maintenance of the granulomatous inflammation in sarcoidosis have been repeatedly associated with the impaired apoptosis of activated inflammatory cells<sup>8 9</sup>. In most patients with sarcoidosis, the early stages of this disease are characterized by mononuclear cell alveolitis dominated by activated CD4<sup>+</sup> T cells and macrophages.

1  
2  
3  
4 1 Between these cells, the uncoordinated interplay results in the formation of typical  
5  
6 2 non - caseating granulomas. The mechanism by which the granulomas resolve has not  
7  
8  
9 3 been fully elucidated. However, it is generally assumed that the induction of apoptosis  
10  
11 4 and / or by the withdrawal of inflammatory cytokines participates in the  
12  
13 5 disappearance of granulomas <sup>10 11</sup>. In the patients with sarcoidosis, their peripheral  
14  
15 6 blood monocytes were characterized by apoptosis <sup>9</sup>.

17  
18  
19 7 In previous studies, case - control / family ‘hypothesis - driven’ studies and low  
20  
21 8 density linkage scans were used to identify genetic factors conferring the genetic  
22  
23 9 susceptibility to sarcoidosis <sup>12</sup>. Notably, the first genome - wide association study  
24  
25 10 (GWAS) in sarcoidosis conducted in a German population has recently revealed an  
26  
27 11 association: the leading rs2789679 SNP (single - nucleotide polymorphism) located in  
28  
29 12 the 3’ - untranslated region (3’ - UTR) and a common nonsynonymous SNP  
30  
31 13 (rs1049550, C > T, Arg230Cys) were associated with increased risk of sarcoidosis <sup>4 13</sup>.  
32  
33 14 This association has recently been supported by another report from the same  
34  
35 15 population <sup>14</sup>. Thus, more studies should be performed to demonstrate the following  
36  
37 16 item: whether these SNPs modulate the risk of sarcoidosis by themselves or whether  
38  
39 17 they correlate with other causative SNPs and are repeated in other populations. The  
40  
41 18 published sarcoidosis - association studies for ANXA11 are summarized in Table 1.  
42  
43 19 We hypothesize that common variants in the ANXA11 gene may significantly  
44  
45 20 contribute to the predisposition to develop sarcoidosis.

46  
47  
48  
49 21 In this study, we investigated fifteen loci in a Chinese population from He’nan  
50  
51 22 province (China) to verify the putative association between ANXA11 polymorphisms  
52  
53  
54  
55  
56  
57  
58  
59  
60

1 and sarcoidosis.

## 2 SUBJECTS AND METHODS

### 3 Subjects

4 Four hundred and twelve patients with sarcoidosis (mean  $\pm$  SD age: 53.6  $\pm$  4.6  
5 years; 155 men and 257 women) ~~-(mean  $\pm$  SD age: 53.6  $\pm$  4.6 years)~~ were recruited  
6 from our hospital between May 2005 and March 2013. Sarcoidosis was diagnosed by  
7 the evidence of non - caseating epitheloid cell granuloma in biopsy specimens and  
8 chest radiographic abnormalities. Chronic sarcoidosis was defined as a disease over at  
9 least 2 years or at least two episodes in a lifetime. A cute sarcoidosis was defined as  
10 one episode of acute sarcoidosis which had totally resolved at the date of the  
11 examination. The control group consisted of 418 unrelated healthy subjects (mean  $\pm$   
12 SD age: 54.2  $\pm$  5.3 years; 160 men and 258 women) who underwent health  
13 examinations in the Medical Examination Center of the First Affiliated Hospital of the  
14 Xinxiang Medical College (Xinxiang, China) between Oct 2009 and Sept 2013. None  
15 of the individuals in the control group had a history of lung diseases or showed any  
16 symptoms of the lung or other diseases by chest radiography or laboratory blood tests.  
17 Participants were excluded if they: were taking other prescribed medications that  
18 could affect the central nervous system; had a history of seizures, hematological  
19 diseases, or severe liver or kidney impairment; or were pregnant. ~~The control group~~  
20 ~~consisted of 418 unrelated healthy subjects (mean  $\pm$  SD age: 54.2  $\pm$  5.3 year) who~~  
21 ~~underwent health examinations in the Medical Examination Center of the First~~  
22 ~~Affiliated Hospital of the Xinxiang Medical College (Xinxiang, China) between Oct~~

1 ~~2009 and Sept 2013. No familial relationship was known between the study~~  
2 ~~participants. All participants were from a non-genetically related Chinese Han~~  
3 ~~population in He'nan Province (China).~~ The study was performed according to the  
4 Guidelines of the Medical Ethical Committee of Xinxiang Medical College (Xinxiang,  
5 China). Written informed consent was obtained from each participant in this study.

### 6 **SNP selection**

7 Tagging SNPs were selected from the catalogs of the International HapMap  
8 Project. The rs2789679 and rs2245168 are located in 5'-UTR, rs2236558 in intron 6,  
9 rs7067644 and rs12763624 in intron 8, rs1049550 in exon 10, rs2573351 in intron 13,  
10 rs10887581, rs11201989, rs2573353, rs2789695, rs2573356, rs2819945, rs11202059  
11 and rs2819941 in intron 14 (Figure 1). Marker selection was done according to  
12 previous studies<sup>4 12 14 15</sup>, and preliminary analysis was performed using the HapMap  
13 data and the following criteria. First, we examined tagSNPs in the Haploview (v4.2),  
14 using the CHB population and a minor allele frequency cut - off (MAF)  $\geq$  5%  
15 (HapMap Data Release 27). We found that there were a total of 29 potential tagSNPs  
16 in all. As a first screen of the most common SNPs in the sarcoidosis sample from an  
17 Eastern Chinese Han population, a MAF  $\geq$  20% with pair - wise tagging and  $r^2 \geq$  0.8  
18 <sup>16</sup> was used as the cut - off when choosing tagSNPs. Second, the LD pattern of this  
19 gene was determined in the Chinese population using the preliminary data from the  
20 HapMap. Five LD blocks across the ANXA11 were defined using Haploview's  
21 'confidence intervals' method<sup>17 18</sup>. These SNPs were further analyzed in an  
22 association study.

~~Marker selection was done according to previous studies<sup>4-12-14-15</sup>, and preliminary analysis was performed using the HapMap data and the following criteria. We examined tagSNPs in the Haploview software v4.2, using the Chinese Han in Beijing (CHB) population and a minor allele frequency cut-off (MAF)  $\geq$  5% (the HapMap Data Release 27). The linkage disequilibrium (LD) pattern of this gene was determined in the Chinese population using the preliminary data from the HapMap. These SNPs were further analyzed in an association study.~~

## Genotyping

Peripheral blood was collected from a vein into a sterile tube coated with ethylenediamine tetraacetic acid (EDTA). Plasma samples were stored at -20°C. Genomic DNA was extracted from the frozen peripheral blood samples using a QIAmp Blood Mini Kit (Qiagen Inc., Valencia, CA, USA) according to the manufacturer's protocols. The selected SNPs were genotyped in cases and controls by using the MALDI - TOF in the MassARRAY system (Sequenom Inc., San Diego, CA, USA). Probes and primers were designed using the Assay Design Software (Sequenom, San Diego, CA, USA). The completed genotyping reactions were spotted onto a 384 well spectroCHIP (Sequenom) using the MassARRAY Nanodispenser (Sequenom) and determined by the matrix - assisted laser desorption ionization time - of - flight mass spectrometer. Genotype calling was performed in realtime with the MassARRAY RT software version 3.0.0.4 and analyzed using the MassARRAY Typer software version 3.4 (Sequenom).

## Statistical analysis

1           All data were analyzed using the SPSS 17.0 software (SPSS Inc., Chicago, IL,  
2           USA). Hardy-Weinberg equilibrium were evaluated by Chi - square tests. Differences  
3           between the cases and controls in the frequency of the alleles, genotypes and  
4           haplotypes were evaluated by the Fisher's exact test or the Pearson Chi - square test.  
5           Unconditional logistic regression was used to calculate the odds ratio (OR) and 95%  
6           confidence interval (CI) in independent association between each locus and the  
7           presence of sarcoidosis. Generalized linear regression was used to evaluate the  
8           interaction effects between gene and gender or age. Gender and age of subjects were  
9           treated as covariants in binary logistic regression. P - value was calculated based on  
10           codominant, dominant for the rare allele, heterosis and recessive for the rare allele  
11           models of inheritance. The Bonferroni correction was used to adjust the test level  
12           when multiple comparisons were conducted, and the P value was divided by the total  
13           number of loci. Haplotype blocks were defined according to the criteria developed by  
14           Gabriel et al. <sup>18</sup>. Pair - wise LD statistics ( $D'$  and  $r^2$ ) and haplotype frequency were  
15           calculated, and haplotype blocks were constructed using the Haploview 4.0 <sup>17</sup>. To  
16           ensure that the LD blocks most closely reflect the population level LD patterns,  
17           definition of the blocks were based on the control samples alone. The haplotype  
18           frequencies were estimated using GENECOUNTING, which computes maximum -  
19           likelihood estimates of haplotype frequencies from unknown phase data by utilizing  
20           an expectation - maximization algorithm <sup>19-22</sup>. The significance of any haplotypic  
21           association was evaluated using a likelihood ratio test, followed by permutation  
22           testing that compared estimated haplotype frequencies in cases and controls <sup>19 21</sup>.



~~All data were analyzed using the SPSS 17.0 software (SPSS Inc., Chicago, IL, USA). Hardy Weinberg equilibrium were evaluated by Chi square tests. Differences between the cases and controls in the frequency of the alleles, genotypes and haplotypes were evaluated by the Fisher's exact test or the Pearson Chi square test. Unconditional logistic regression was used to calculate the odds ratio (OR) and 95% confidence interval (CI) in independent association between each locus and the presence of sarcoidosis. The Bonferroni correction was used to adjust the test level when multiple comparisons were conducted, and the *P* value was divided by the total number of loci. Haplotype blocks were defined according to the criteria developed by Gabriel et al.<sup>18</sup>. Pair wise LD statistics ( $D'$  and  $r^2$ ) and haplotype frequency were calculated, and haplotype blocks were constructed using the Haploview 4.0.<sup>17</sup>.~~

## RESULTS

The genotype distribution of the fifteen polymorphisms was consistent with the Hardy - Weinberg equilibrium ( $P > 0.05$ ). The analysis of strong LD in the patients with sarcoidosis and healthy controls revealed that 2 SNPs (rs2245168, rs2236558), 2 SNPs (rs1049550, rs2573351), 2 SNPs (rs2789695, rs2573356) and 3 SNPs (rs2819945, rs11202059, rs2819941) were located in haplotype block 1, block 2, block 3 and block 4 ( $D' > 0.9$ , Fig. 2). The genotype distribution, allelic frequencies, and haplotypes in the patients with sarcoidosis and healthy controls are showed in tables 2, table 4 and table 5.

Comparison of genotype and allele frequency distribution revealed significant differences between the patients with sarcoidosis and healthy controls for 3 SNPs:

1 rs2789679, rs1049550 and rs2819941. The frequency of the T allele in rs2789679 ( $P$   
2 = 0.0003, OR = 0.70, 95%CI = 0.58 - 0.85), T allele in rs1049550 ( $P$  = 0.0007, OR =  
3 0.62, 95%CI = 0.50 - 0.76) and the rs2819941 C allele frequency ( $P$  = 0.001, OR =  
4 0.71, 95%CI = 0.59 - 0.87) in the patients with sarcoidosis was significantly lower  
5 than that in the controls, and these differences remained statistically significant after  
6 Bonferroni corrections. There were no interactions among rs2789679, rs1049550 and  
7 rs2819941 ( $P > 0.05$ ).

8 We performed an association analysis to determine whether the haplotype was  
9 associated with the risk of sarcoidosis (Global  $P < 0.05$  in block 2 and block 3).  
10 Compared with the healthy controls, the T - C haplotype occurred significantly less  
11 frequently ( $P = 0.001$ ) and the C - C haplotypes occurred more frequently ( $P = 0.0001$ )  
12 in block 2 ( rs1049550 - rs2573351) in the patients with sarcoidosis.

13 To assess particular disease phenotypes, the patients with sarcoidosis were  
14 divided into the subgroups according to their chest radiographic (CXR) stage. CXR  
15 stage I (isolated bilateral hilar lymphadenopathy): N = 196; CXR stages II - IV  
16 (infiltration of parenchyma): 167; CXR stage 0 (absence on pulmonary disease): N =  
17 28; the information on CXR stage was not available for 21 patients. Comparison of  
18 genotype frequency distribution revealed significant differences between stage I and  
19 stages II - IV for rs1049550. The significantly more CC genotype ( $P = 0.012$ ) were  
20 found in the patients with stage I sarcoidosis (table 3).

## 21 DISCUSSION

22 A key step in linkage and association studies is to identify common risk variants

1  
2  
3  
4 1 in different populations. To determine if common risk variants exist in distinct  
5  
6 2 populations, fifteen SNPs which span approximately 0.53 Mb of the ANXA11 gene,  
7  
8  
9 3 were genotyped in samples from the patients with sarcoidosis and healthy controls in  
10  
11 4 a Chinese Han population. Recently, new sarcoidosis loci have been identified by  
12  
13 5 genome - wide association studies <sup>4 14</sup>. With the fast development of genome - wide  
14  
15 6 association studies, increasing number of susceptibility loci for sarcoidosis have been  
16  
17 7 reported in different populations <sup>4 14 15</sup>. However, these observations should be  
18  
19 8 confirmed in other genetically independent populations. In this study, we conducted  
20  
21 9 the first large genetic association study of the ANXA11 gene in a Chinese Han  
22  
23 10 population. The evidence of markers associated with sarcoidosis was presented, and  
24  
25 11 these markers were mapped to different locations in the ANXA11 gene (81897864 -  
26  
27 12 81951001). The association signals in the region were identified, and some  
28  
29 13 significantly associated haplotypes also appeared this region.  
30  
31  
32  
33  
34  
35

36  
37 14 Hoffman et al. reported an association between the T allele of the non -  
38  
39 15 synonymous SNP rs1049550 and significantly decreased risk of sarcoidosis in a  
40  
41 16 German population <sup>4</sup>. Similar results were also obtained in other two European  
42  
43 17 populations <sup>14 15</sup>. As a part of the sarcoidosis GWAS done in Americans <sup>23</sup>, we further  
44  
45 18 confirmed this association in a Chinese Han population. In this study, the frequency of  
46  
47 19 ANXA11 rs1049550T allele was significantly lower in the patients with sarcoidosis  
48  
49 20 than that in the healthy controls. Comparison of stages II - IV, the significantly more  
50  
51 21 CC genotypewas found in the patients with stages I sarcoidosis. The “protective”  
52  
53 22 effect of ANXA11 T allele increased with the number of its copies in the genotype.  
54  
55  
56  
57  
58  
59  
60

1 which is consistent with the result obtained in the patients with sarcoidosis in a  
2 German population<sup>4</sup>, Furthermore, the T allele carriers among the patients were  
3 protected from infiltration of lung parenchyma (radiographic stages II-IV)<sup>15</sup>. We have  
4 also demonstrated that rs1049550 is significant cross - ethnically at the gene level  
5 after adjustment for the single SNP association tests performed. The mechanism by  
6 which rs1049550 affects the susceptibility to sarcoidosis may be that the SNP may  
7 affect the function of the ANXA11 protein rather than affect its expression. In humans,  
8 the ANXA11 protein consists of an N - terminalproline - tyrosine - glycine (PYG) -  
9 rich region, followed by four annexin core domains. The rs1049550 leads to an amino  
10 - acid exchange (basic arginine to a polar cysteine) at the evolutionarily conserved  
11 position 230 (R230C) in the first annexin domain, which is responsible for Ca<sup>2+</sup> -  
12 dependent trafficking of the protein in the cell<sup>24</sup>.

13 In the GWAS conducted by Hofmann et al<sup>4</sup>, the strongest association signal was  
14 observed for rs2789679. This marker is located in the 3' - UTR of the ANXA11 gene.  
15 The T allele had a frequency of 35% among the patients with sarcoidosis and 44% in  
16 the healthy controls, with 13% of the patients with sarcoidosis and 19% of controls  
17 being TT homozygous. Fine - mapping in the Black Women's Health Study (BWHS)  
18 revealed rs2819941 to be the top SNP, associated with a nonsignificant ( $P = 0.06$ )  
19 reduction in sarcoidosis risk (17% reduction per copy of the C-allele). In this case -  
20 control association study, the frequency of the T allele in rs2789679 and the  
21 rs2819941 C allele frequency in the patients with sarcoidosis was significantly lower  
22 than that in the healthy controls. Several lines of evidence suggest that the observed

1 associations are unlikely to be an artifact. First, both the single - SNP and the  
2 haplotype - based association analyses support the current finding. Second, population  
3 stratification is an impossible reason, because all of our samples were from the same  
4 geographical region. Finally, consistent results were obtained from two genetically  
5 independent populations (Chinese Han and Europeans). Collectively, our results  
6 confirmed the strong association between variations in the ANXA11 gene and  
7 sarcoidosis, and suggest that ANXA11 represents a strong genetic risk factor for  
8 sarcoidosis.

9 We further investigated the interaction among polymorphisms and observed  
10 strong LD. The haplotype analysis revealed that significantly more C - C (block 2,  
11 rs1049550 - rs2573351) and significantly fewer T - C haplotypes (block 2) were  
12 found in the patients with sarcoidosis. These results indicated that the patients with C  
13 - C (block 2) haplotypes of the ANXA11 gene were more prone to sarcoidosis.  
14 Significantly higher frequencies of T - C haplotypes were detected in the healthy  
15 controls than in the patients with sarcoidosis, suggesting that they may show a  
16 protective effect against sarcoidosis. Our sample size can detect SNP and haplotype  
17 associations with 90% and 85% power, respectively, at a false positive rate of 5%,  
18 disease prevalence of 1%, disease allele / haplotype frequency of 0.05 / 0.03, and a  
19 presumed odds ratio (OR) of 1.5. To some extent, this finding further supports a role  
20 of ANXA11 polymorphisms in sarcoidosis, while ethnic group difference may exist.

21 In conclusion, our study suggests a potential role of the ANXA11 SNPs and their  
22 related haplotypes in the genetic susceptibility to sarcoidosis. Further studies are

1 needed to investigate how these SNPs affect the function of ANXA11.

## 2 **Contributors**

3 LG Zhang was involved in conception and design of the study, acquisition of  
4 patient data, genotyping and drafted the paper. ZJ Xiao and GC Shi were involved in  
5 design of the study, genotyping and interpretation of results. J Huang and CX Zhang  
6 were involved in design of the study, acquisition of patient data and interpretation of  
7 result. All authors revised the draft paper.

## 8 **Funding**

9 The project was supported by the Research and Development Foundation of  
10 Science and Technology of Henan Province (2012k15).

## 11 **Competing interests**

12 None.

## 13 **Patient consent**

14 Obtained.

## 15 **Ethics approval**

16 Ethics approval was provided by the First Hospital Affiliated to the Xinxiang  
17 Medical College.

## 18 **Provenance and peer review**

19 Not commissioned; externally peer reviewed.

## 20 **Data sharing statement**

21 No additional data are available.

## 22 **Figure Legend**

1 **Fig. 1** The structure of the human ANXA11 gene and 15 SNPs located on the gene.

2 **Fig. 2** The LD plot of the fifteen SNPs in the ANXA11 gene. Values in squares are the  
3 pair-wise calculation of  $r^2$  (left) or  $D'$  (right). Black squares indicate  $r^2 = 1$  (i.e. perfect  
4 LD between a pair of SNPs). Empty squares indicate  $D' = 1$  (i.e. complete LD  
5 between a pair of SNPs).

## 6 Reference

- 7 1. Iannuzzi MC, Rybicki BA, Teirstein AS. Sarcoidosis. *N Engl J Med* 2007;  
8 357:2153-65.
- 9 2. Baughman RP, Lower EE, du Bois RM. Sarcoidosis. *Lancet* 2003;361:1111-8
- 10 3. Grunewald J. Review: role of genetics in susceptibility and outcome of sarcoidosis.  
11 *Semin Respir Crit Care Med* 2010;31:380-9.
- 12 4. Hofmann S, Franke A, Fischer A, *et al.* Genome-wide association study identifies  
13 ANXA11 as a new susceptibility locus for sarcoidosis. *Nat Genet*  
14 2008;40:1103-6.
- 15 5. Gerke V, Moss SE. Annexins: from structure to function. *Physiol Rev*  
16 2002;82:331-71.
- 17 6. Farnaes L, Ditzel HJ. Dissecting the cellular functions of annexin XI using  
18 recombinant human annexin XI-specific autoantibodies cloned by phage  
19 display. *J Biol Chem* 2003;278:33120-6.
- 20 7. Tomas A, Futter C, Moss SE. Annexin 11 is required for midbody formation and  
21 completion of the terminal phase of cytokinesis. *J Cell Biol* 2004;165:813-22.
- 22 8. Petzmann S, Maercker C, Markert E, *et al.* Enhanced proliferation and decreased

- 1  
2  
3  
4 1 apoptosis in lung lavage cells of sarcoidosis patients. *Sarcoidosis Vasc Diffuse*  
5  
6 2 *Lung Dis* 2006;23:190-200  
7  
8  
9 3 9. Dubaniewicz A, Trzonkowski P, Dubaniewicz-Wybieralska M, *et al.* Comparative  
10  
11 4 analysis of mycobacterial heat shock proteins-induced apoptosis of peripheral  
12  
13 5 blood mononuclear cells in sarcoidosis and tuberculosis. *J Clin Immunol*  
14  
15 6 2006;26:243-50.  
16  
17  
18 7 10. Agostini C, Trentin L, Facco M, *et al.* Role of IL-15, IL-2, and their receptors in  
19  
20 8 the development of T cell alveolitis in pulmonary sarcoidosis. *J Immunol*  
21  
22 9 1996;157:910-8  
23  
24  
25 10 11. Jullien D, Sieling PA, Uyemura K, *et al.* IL-15, an immunomodulator of T cell  
26  
27 11 responses in intracellular infection. *J Immunol* 1997;158:800-6  
28  
29  
30 12 12. Muller-Quernheim J, Schurmann M, Hofmann S, *et al.* Genetics of sarcoidosis.  
31  
32 13 *Clin Chest Med* 2008;29:391-414.  
33  
34  
35 14 13. Morais A, Lima B, Peixoto M, *et al.* Annexin A11 gene polymorphism (R230C  
36  
37 15 variant) and sarcoidosis in a Portuguese population. *Tissue antigens*  
38  
39 16 2013;82:186-91.  
40  
41  
42 17 14. Li Y, Pabst S, Kubisch C, *et al.* First independent replication study confirms the  
43  
44 18 strong genetic association of ANXA11 with sarcoidosis. *Thorax*  
45  
46 19 2010;65:939-40.  
47  
48  
49 20 15. Mrazek F, Stahelova A, Kriegova E, *et al.* Functional variant ANXA11 R230C:  
50  
51 21 true marker of protection and candidate disease modifier in sarcoidosis. *Genes*  
52  
53 22 *Immun* 2011;12:490-4.  
54  
55  
56  
57  
58  
59  
60



- 1  
2  
3  
4 16. de Bakker PI, Yelensky R, Pe'er I, *et al.* Efficiency and power in genetic  
5  
6 association studies. *Nat Genet* 2005;37:1217-23.  
7  
8  
9 17. Barrett JC, Fry B, Maller J, *et al.* Haploview: analysis and visualization of LD and  
10  
11 haplotype maps. *Bioinformatics* 2005;21:263-5.  
12  
13  
14 18. Gabriel SB, Schaffner SF, Nguyen H, *et al.* The structure of haplotype blocks in  
15  
16 the human genome. *Science* 2002;296:2225-9.  
17  
18  
19 19. Curtis D, Knight J, Sham PC. Program report: GENECOUNTING support  
20  
21 programs. *Ann Hum Genet* 2006;70:277-9.  
22  
23  
24 20. Zhao JH, Curtis D, Sham PC. Model-free analysis and permutation tests for allelic  
25  
26 associations. *Hum Hered* 2000;50:133-9.  
27  
28  
29 21. Zhao JH, Lissarrague S, Essioux L, *et al.* GENECOUNTING: haplotype analysis  
30  
31 with missing genotypes. *Bioinformatics* 2002;18:1694-5  
32  
33  
34 22. Zhao JH, Sham PC. Generic number systems and haplotype analysis. *Comput*  
35  
36 *Methods Programs Biomed* 2003;70:1-9  
37  
38  
39 23. Levin AM, Iannuzzi MC, Montgomery CG, *et al.* Association of ANXA11 genetic  
40  
41 variation with sarcoidosis in African Americans and European Americans.  
42  
43 *Genes Immun* 2013;14:13-8.  
44  
45  
46 24. Tomas A, Moss SE. Calcium- and cell cycle-dependent association of annexin 11  
47  
48 with the nuclear envelope. *J Biol Chem* 2003;278:20210-6.  
49  
50  
51  
52  
53  
54  
55  
56  
57  
58  
59  
60

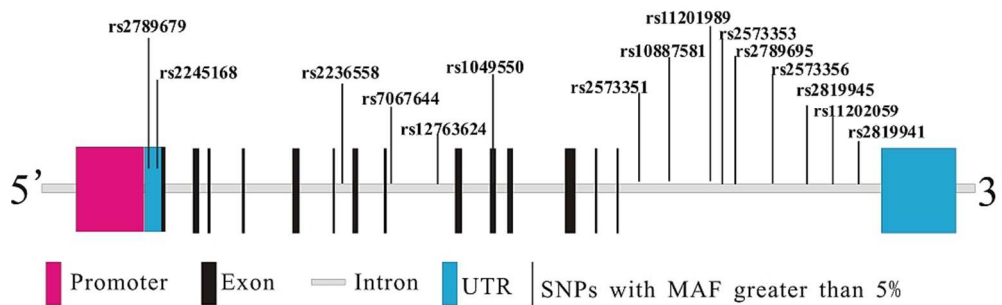

The structure of the human ANXA11 gene and 15 SNPs located on the gene.  
90x27mm (300 x 300 DPI)

peer review only

1  
2  
3  
4  
5  
6  
7  
8  
9  
10  
11  
12  
13  
14  
15  
16  
17  
18  
19  
20  
21  
22  
23  
24  
25  
26  
27  
28  
29  
30  
31  
32  
33  
34  
35  
36  
37  
38  
39  
40  
41  
42  
43  
44  
45  
46  
47  
48  
49  
50  
51  
52  
53  
54  
55  
56  
57  
58  
59  
60

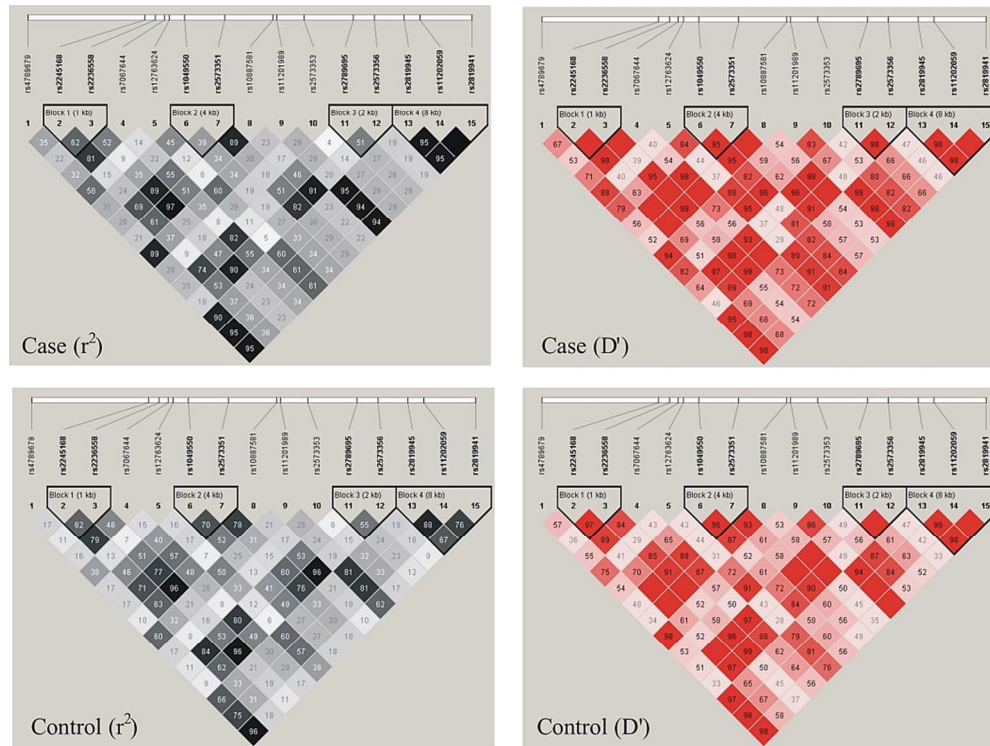

The LD plot of the fifteen SNPs in the ANXA11 gene. Values in squares are the pair-wise calculation of  $r^2$  (left) or  $D'$  (right). Black squares indicate  $r^2 = 1$  (i.e. perfect LD between a pair of SNPs). Empty squares indicate  $D' = 1$  (i.e. complete LD between a pair of SNPs).  
90x66mm (300 x 300 DPI)

# BMJ Open

## Annexin A11 (ANXA11) gene polymorphisms are associated with sarcoidosis in a Han Chinese population - a case-control study

|                                 |                                                                                                                                                                                                                                                                                                                                                                                                                                                                                                                                                                                    |
|---------------------------------|------------------------------------------------------------------------------------------------------------------------------------------------------------------------------------------------------------------------------------------------------------------------------------------------------------------------------------------------------------------------------------------------------------------------------------------------------------------------------------------------------------------------------------------------------------------------------------|
| Journal:                        | <i>BMJ Open</i>                                                                                                                                                                                                                                                                                                                                                                                                                                                                                                                                                                    |
| Manuscript ID:                  | bmjopen-2013-004466.R2                                                                                                                                                                                                                                                                                                                                                                                                                                                                                                                                                             |
| Article Type:                   | Research                                                                                                                                                                                                                                                                                                                                                                                                                                                                                                                                                                           |
| Date Submitted by the Author:   | 27-Mar-2014                                                                                                                                                                                                                                                                                                                                                                                                                                                                                                                                                                        |
| Complete List of Authors:       | Zhang, LG; the First Hospital Affiliated to the Xinxiang Medical College, The Third Department of Tuberculosis<br>Xiao, ZJ; the First Hospital Affiliated to the Xinxiang Medical College, The Third Department of Tuberculosis<br>Shi, GC; the First Hospital Affiliated to the Xinxiang Medical College, The Third Department of Tuberculosis<br>J, Huang; the First Hospital Affiliated to the Xinxiang Medical College, The Third Department of Tuberculosis<br>Zhang, CX; the First Hospital Affiliated to the Xinxiang Medical College, The Third Department of Tuberculosis |
| <b>Primary Subject Heading</b>: | Infectious diseases                                                                                                                                                                                                                                                                                                                                                                                                                                                                                                                                                                |
| Secondary Subject Heading:      | Genetics and genomics                                                                                                                                                                                                                                                                                                                                                                                                                                                                                                                                                              |
| Keywords:                       | GENETICS, IMMUNOLOGY, INFECTIOUS DISEASES                                                                                                                                                                                                                                                                                                                                                                                                                                                                                                                                          |
|                                 |                                                                                                                                                                                                                                                                                                                                                                                                                                                                                                                                                                                    |

SCHOLARONE™  
Manuscripts

only

1  
2  
3  
4 1 **Annexin A11 (ANXA11) gene polymorphisms are associated with sarcoidosis in a**

5  
6 2 **Han Chinese population - a case-control study**

7  
8  
9 3 LG Zhang, ZJ Xiao\*, GC Shi, J Huang, CX Zhang

10  
11 4 The Third Department of Tuberculosis, the First Hospital Affiliated to the Xinxiang

12  
13  
14 5 Medical College, Xinxiang, Henan, PR China

15  
16 6 \*Corresponding author: Zhijian Xiao, The Third Department of Tuberculosis, the First

17  
18  
19 7 Hospital Affiliated to the Xinxiang Medical College, Xinxiang, Henan, PR China.

20  
21 8 No.88 Jiankang Road, Weihui City, Henan, 463000, PR China

22  
23  
24 9 E-mail: zhangligongys@163.com

25  
26 10 Tel: +86 0373 - 4402229 (office)

27  
28  
29 11 Fax: +86 0373 -4402251

30  
31 12 **Key words:** Sarcoidosis; Annexin A11; Single-nucleotide polymorphism

32  
33  
34 13 Word count: 3787

35  
36  
37  
38  
39  
40  
41  
42  
43  
44  
45  
46  
47  
48  
49  
50  
51  
52  
53  
54  
55  
56  
57  
58  
59  
60 14

1  
2  
3  
4  
5  
6  
7  
8  
9  
10  
11  
12  
13  
14  
15  
16  
17  
18  
19  
20  
21  
22  
23  
24  
25  
26  
27  
28  
29  
30  
31  
32  
33  
34  
35  
36  
37  
38  
39  
40  
41  
42  
43  
44  
45  
46  
47  
48  
49  
50  
51  
52  
53  
54  
55  
56  
57  
58  
59  
60

## 1 Abstract

2 **Objectives:** To further identify the single-nucleotide polymorphisms (SNPs) that  
3 contribute to the genetic susceptibility to sarcoidosis, we examined the potential  
4 association between sarcoidosis and fifteen SNPs of the ANXA11 gene.

5 **Design:** A case - control study.

6 **Setting:** A tuberculosis unit in a hospital of the university in China.

7 **Participants:** Participants included 412 patients with sarcoidosis and 418 healthy  
8 controls.

9 **Methods:** The selected SNPs were genotyped using the MALDI-TOF in the  
10 MassARRAY system. Probes and primers were designed using the Assay Design  
11 Software (Sequenom, San Diego, CA, USA).

12 **Results:** The results showed that statistical significant differences were found in the  
13 allelic or genotypic frequencies of the rs2789679, rs1049550 and rs2819941 in the  
14 ANXA11 gene between the patients with sarcoidosis and the controls. The frequency  
15 of the T allele in rs2789679 ( $P = 0.0003$ , OR = 0.70, 95%CI = 0.58 - 0.85) and  
16 rs1049550 ( $P = 0.0007$ , OR = 0.62, 95%CI= 0.50 - 0.76), and C allele in rs2819941  
17 ( $P = 0.001$ , OR = 0.71, 95%CI = 0.59 - 0.87) in the patients with sarcoidosis was  
18 significantly lower than that in the controls. The strong linkage disequilibrium (LD)  
19 was observed in four blocks ( $D' > 0.9$ ). In block 2 (rs1049550-rs2573351), the T - C  
20 haplotype occurred significantly less frequently ( $P = 0.001$ ), whereas the C - C  
21 haplotypes occurred more frequently ( $P = 0.0001$ ) in the patients with sarcoidosis  
22 than the controls. Furthermore, genotype frequency distribution revealed that, in

1  
2  
3  
4 1 rs1049550, CC genotype was significantly more in the patients with chest  
5  
6 2 radiographic (CXR) stage I sarcoidosis than the patients with CXR stage II-IV  
7  
8  
9 3 sarcoidosis ( $P = 0.012$ ).

10  
11 4 **Conclusions:** These findings point to a role for the polymorphisms of ANXA11 in  
12  
13 5 sarcoidosis in a Chinese Han population, and may be informative for future genetic  
14  
15 6 or biological studies on sarcoidosis.  
16  
17  
18  
19 7

1  
2  
3  
4  
5  
6  
7  
8  
9  
10  
11  
12  
13  
14  
15  
16  
17  
18  
19  
20  
21  
22  
23  
24  
25  
26  
27  
28  
29  
30  
31  
32  
33  
34  
35  
36  
37  
38  
39  
40  
41  
42  
43  
44  
45  
46  
47  
48  
49  
50  
51  
52  
53  
54  
55  
56  
57  
58  
59  
60

1 **Article summary**

2 **Article focus**

3 1. The first genome-wide association study (GWAS) in sarcoidosis conducted in a  
4 German population has revealed that the rs1049550 (C > T, Arg230Cys) located in  
5 exon 10 were associated with sarcoidosis.

6 2. Whether these SNPs modulate the risk of sarcoidosis by themselves or whether  
7 they correlate with other causative SNPs and are repeated in other populations remain  
8 unclear.

9 3. We hypothesize that common variants in the ANXA11 gene may significantly  
10 contribute to the predisposition to develop sarcoidosis in a Chinese Han population.

11 **Key messages**

12 1. ANXA11 rs2789679 (3'-UTR) was significantly associated with sarcoidosis.

13 2. ANXA11 rs1049550 (exon 10) was significantly associated with sarcoidosis.

14 3. Another significant association was observed for rs2819941 (intron 14).

15 **Strengths and limitations of this study**

16 1. A systematical screening of the functional SNPs in the promoter region, 5'- and  
17 3'-UTR, exons of the ANXA11 gene, and the homogeneity of the study subjects  
18 representing the Chinese Han are the main strengths of this study. Chinese Han

19 2. The lack of data proving the positive association observed for rs2789679 and  
20 rs1049550 is a potential limitation of this study. Furthermore, the association of the  
21 serum level of ANXA11 with sarcoidosis still needs to be investigated.

22



## 1 INTRODUCTION

2 Sarcoidosis is a systemic autoimmune disease characterized by destructive,  
3 non-caseating epithelioid granulomatous lesions, with accumulated phagocytes and  
4 activated CD4<sup>+</sup> T helper type 1 lymphocytes <sup>1 2</sup>. The typical manifestations of  
5 sarcoidosis include bilateral hilar lymphadenopathy, pulmonary infiltration and ocular  
6 and skin lesions. The clinical course and prognosis of sarcoidosis are variable. The  
7 acute forms of sarcoidosis such as Löfgren's syndrome (LS) can resolve  
8 spontaneously in most cases. However, chronic pulmonary sarcoidosis may progress  
9 to lung fibrosis which eventually causes respiratory failure. Recent studies have  
10 demonstrated that sarcoidosis can occur in a pattern of family clustering, and its racial  
11 incidence is also different, suggesting that some genetic factors may contribute to the  
12 risk and severity of sarcoidosis <sup>1 3</sup>.

13 The Annexin gene family is involved in the etiology of several autoimmune and  
14 chronic diseases <sup>4 5</sup>. One member of the Annexin gene family, ANXA11, located on  
15 chromosome 10q22.3, is involved in calcium signaling, apoptosis, vesicle trafficking,  
16 cell growth and terminal phase of cell division <sup>5-7</sup>. In this context, the development  
17 and maintenance of the granulomatous inflammation in sarcoidosis have been  
18 repeatedly associated with the impaired apoptosis of activated inflammatory cells <sup>8 9</sup>.  
19 Most of the early-stage sarcoidosis is characterized by mononuclear cell alveolitis  
20 dominated by activated CD4<sup>+</sup> T cells and macrophages. Between these cells, the  
21 uncoordinated interplay results in the formation of typical non-caseating granulomas.  
22 The mechanism by which the granulomas resolve has not been fully elucidated.

1  
2  
3  
4 1 However, it is generally assumed that the induction of apoptosis and/or by the  
5  
6 2 withdrawal of inflammatory cytokines participates in the disappearance of  
7  
8 3 granulomas<sup>10 11</sup>. In the patients with sarcoidosis, their peripheral blood monocytes  
9  
10 4 were characterized by apoptosis<sup>9</sup>.

11  
12  
13  
14 5 In previous studies, case - control/family ‘hypothesis - driven’ studies and low  
15  
16 6 density linkage scans were used to identify genetic factors conferring the genetic  
17  
18 7 susceptibility to sarcoidosis<sup>12</sup>. Notably, the first genome - wide association study  
19  
20 8 (GWAS) in sarcoidosis conducted in a German population has recently revealed an  
21  
22 9 association: the leading rs2789679 SNP (single - nucleotide polymorphism) located in  
23  
24 10 the 3’-untranslated region (3’-UTR) and a common nonsynonymous SNP (rs1049550,  
25  
26 11 C > T, Arg230Cys) were associated with the increased risk of sarcoidosis<sup>4 13</sup>. This  
27  
28 12 association has recently been supported by another report from the same population<sup>14</sup>.  
29  
30 13 Thus, more studies should be performed to demonstrate the following items: whether  
31  
32 14 these SNPs modulate the risk of sarcoidosis by themselves or whether they correlate  
33  
34 15 with other causative SNPs and are repeated in other populations. The published  
35  
36 16 studies about the association of sarcoidosis and ANXA11 are summarized in  
37  
38 17 Supplemental table 1. We hypothesize that common variants in the ANXA11 gene  
39  
40 18 may significantly contribute to the predisposition to develop sarcoidosis.  
41  
42  
43  
44  
45  
46  
47  
48

49 19 In this study, we investigated fifteen loci in a Chinese population from He’nan  
50  
51 20 province (China) to verify the putative association between ANXA11 polymorphisms  
52  
53 21 and sarcoidosis.  
54  
55

## 56 22 **SUBJECTS AND METHODS**

57  
58  
59  
60

## 1 **Subjects**

2 Four hundred and twelve patients with sarcoidosis (mean  $\pm$  SD age:  $53.6 \pm 4.6$   
3 years; 155 men and 257 women) were recruited from our hospital between May 2005  
4 and March 2013. Sarcoidosis was diagnosed by the evidence of non-caseating  
5 epitheloid cell granuloma in biopsy specimens and chest radiographic abnormalities.  
6 Chronic sarcoidosis was defined as a disease over at least 2 years or at least two  
7 episodes in a lifetime. A cute sarcoidosis was defined as one episode of acute  
8 sarcoidosis which had totally resolved at the date of the examination. The control  
9 group consisted of 418 unrelated healthy subjects (mean  $\pm$  SD age:  $54.2 \pm 5.3$  years;  
10 160 men and 258 women) who underwent health examinations in the Medical  
11 Examination Center of the First Affiliated Hospital of the Xinxiang Medical College  
12 (Xinxiang, China) between Oct 2009 and Sept 2013. None of the individuals in the  
13 control group had a history of lung diseases or showed any symptoms of the lung or  
14 other diseases by chest radiography or laboratory blood tests. Participants were  
15 excluded if they: were taking other prescribed medications that could affect the  
16 central nervous system; had a history of seizures, hematological diseases, or severe  
17 liver or kidney impairment; or were pregnant. No familial relationship was known  
18 between the study participants. The study was performed according to the Guidelines  
19 of the Medical Ethical Committee of Xinxiang Medical College (Xinxiang, China).  
20 Written informed consent was obtained from each participant in this study.

## 21 **SNP selection**

1 Tagging SNPs were selected from the catalogs of the International HapMap  
2 Project. The rs2789679 and rs2245168 are located in 5'-UTR, rs2236558 in intron 6,  
3 rs7067644 and rs12763624 in intron 8, rs1049550 in exon 10, rs2573351 in intron 13,  
4 rs10887581, rs11201989, rs2573353, rs2789695, rs2573356, rs2819945, rs11202059  
5 and rs2819941 in intron 14 (Supplemental figure 1). Marker selection was based on  
6 the following criteria. (a) We used the CHB data from the HapMap (release 27) to  
7 select tagSNPs for ANXA11. (b) We restricted our search for tagSNPs from base pair  
8 80155124 to 80205677. (c) Further, we limited the SNPs to tag to those with a minor  
9 allele frequency  $\geq 0.2$  in the CHB. (d) Based on these restrictions, there were a total  
10 of 29 SNPs. (e) Using HAPLOVIEW with an  $r^2$  threshold  $\geq 0.8$ , 15 tagSNP were  
11 selected and used for subsequent analyses.

## 12 Genotyping

13 Peripheral blood was collected from a vein into a sterile tube coated with  
14 ethylenediamine tetraacetic acid (EDTA). Plasma samples were stored at  $-20^{\circ}\text{C}$ .  
15 Genomic DNA was extracted from the frozen peripheral blood samples using a  
16 QIAmp Blood Mini Kit (Qiagen Inc., Valencia, CA, USA) according to the  
17 manufacturer's protocols. The selected SNPs were genotyped in cases and controls by  
18 using the MALDI-TOF in the MassARRAY system (Sequenom Inc., San Diego, CA,  
19 USA). Probes and primers were designed using the Assay Design Software  
20 (Sequenom, San Diego, CA, USA). The completed genotyping reactions were spotted  
21 onto a 384 well spectroCHIP (Sequenom) using the MassARRAY Nanodispenser  
22 (Sequenom) and determined by the matrix - assisted laser desorption ionization time -

1  
2  
3  
4 1 of - flight mass spectrometer. Genotype calling was performed in realtime with the  
5  
6 2 MassARRAY RT software version 3.0.0.4 and analyzed using the MassARRAY Typer  
7  
8  
9 3 software version 3.4 (Sequenom).

#### 10 4 **Statistical analysis**

11  
12  
13  
14 5 All data were analyzed using the SPSS 17.0 software (SPSS Inc., Chicago, IL,  
15  
16 6 USA). Hardy-Weinberg equilibrium was evaluated by Chi-square tests. Differences  
17  
18 7 between the cases and controls in the frequency of the alleles, genotypes and  
19  
20 8 haplotypes were evaluated by the Fisher's exact test or the Pearson Chi-square test.  
21  
22 9 Unconditional logistic regression was used to calculate the odds ratio (OR) and 95%  
23  
24 10 confidence interval (CI) in independent association between each locus and the  
25  
26 11 presence of sarcoidosis. Logistic regression was used to evaluate the interaction  
27  
28 12 effects between gene and gender or age. Gender and age of subjects were treated as  
29  
30 13 covariants in binary logistic regression. *P* values were calculated based on  
31  
32 14 codominant, dominant for the rare allele, heterosis and recessive for the rare allele  
33  
34 15 models of inheritance. The Bonferroni correction was used to adjust the test level  
35  
36 16 when multiple comparisons were conducted, and the *P* value was divided by the total  
37  
38 17 number of loci. Haplotype blocks were defined according to the criteria developed by  
39  
40 18 Gabriel et al.<sup>15</sup>. Pair-wise LD statistics ( $D'$  and  $r^2$ ) and haplotype frequency were  
41  
42 19 calculated, and haplotype blocks were constructed using the Haploview 4.0<sup>16</sup>. To  
43  
44 20 ensure that the LD blocks most closely reflect the population level LD patterns,  
45  
46 21 definition of the blocks were based on the control samples alone. The haplotype  
47  
48 22 frequencies were estimated using GENECOUNTING, which computes maximum -  
49  
50  
51  
52  
53  
54  
55  
56  
57  
58  
59  
60

1  
2  
3  
4 likelihood estimates of haplotype frequencies from unknown phase data by utilizing  
5  
6 an expectation - maximization algorithm<sup>17-20</sup>. The significance of any haplotypic  
7  
8 association was evaluated using a likelihood ratio test, followed by permutation  
9  
10 testing that compared estimated haplotype frequencies in cases and controls<sup>17 19</sup>.  
11  
12

## 13 RESULTS

14  
15  
16 The genotype distribution of the fifteen polymorphisms was consistent with the  
17  
18 Hardy-Weinberg equilibrium ( $P > 0.05$ ). The analysis of strong LD in the patients  
19  
20 with sarcoidosis and healthy controls revealed that 2 SNPs (rs2245168, rs2236558), 2  
21  
22 SNPs (rs1049550, rs2573351), 2 SNPs (rs2789695, rs2573356) and 3 SNPs  
23  
24 (rs2819945, rs11202059, rs2819941) were located in haplotype block 1, block 2,  
25  
26 block 3 and block 4 ( $D' > 0.9$ , Fig. 1). The genotype distribution, allelic frequencies,  
27  
28 and haplotypes in the patients with sarcoidosis and healthy controls are showed in  
29  
30 Tables 1-3 and Supplemental table 2  
31  
32  
33  
34  
35

36  
37 Comparison of genotype and allele frequency distribution revealed significant  
38  
39 differences between the patients with sarcoidosis and healthy controls for 3 SNPs:  
40  
41 rs2789679, rs1049550 and rs2819941. The frequency of the T allele in rs2789679 ( $P$   
42  
43 = 0.0003, OR = 0.70, 95%CI = 0.58 - 0.85) and rs1049550 ( $P$  = 0.0007, OR = 0.62,  
44  
45 95%CI = 0.50 - 0.76), and C allele in rs2819941 ( $P$  = 0.001, OR = 0.71, 95%CI =  
46  
47 0.59 - 0.87) in the patients with sarcoidosis was significantly lower than that in the  
48  
49 controls, and these differences remained statistically significant after Bonferroni  
50  
51 corrections. We presented a multi-SNP model of sarcoidosis risk. We screen out the  
52  
53 most significant model to predict the risk by forward stepwise strategy in logistic  
54  
55  
56  
57  
58  
59  
60

1 regression, and found that a model includes rs2789679 and rs1049550 is the best one  
2  
3  
4  
5  
6 (Supplemental table 3), which suggests that there is a interaction between them.  
7

8  
9 We performed an association analysis to determine whether the haplotype was  
10  
11 associated with the risk of sarcoidosis (Global  $P < 0.05$  in block 2 and block 3).  
12  
13 Compared with the controls, the T - C haplotype occurred significantly less frequently  
14  
15 ( $P = 0.001$ ) but the C - C haplotypes occurred more frequently ( $P = 0.0001$ ) in block 2  
16  
17 (rs1049550 - rs2573351) in the patients with sarcoidosis.  
18  
19

20  
21 To assess particular disease phenotypes, the patients with sarcoidosis were  
22  
23 divided into the subgroups according to their chest radiographic (CXR) stage. CXR  
24  
25 stage I (isolated bilateral hilar lymphadenopathy): N = 196; CXR stages II - IV  
26  
27 (infiltration of parenchyma): 167; CXR stage 0 (absence on pulmonary disease): N =  
28  
29 28; the information on CXR stage was not available for 21 patients. Genotype  
30  
31 frequency distribution revealed that, in rs1049550, CC genotype was significantly  
32  
33 more in the patients with chest radiographic (CXR) stage I sarcoidosis than the  
34  
35 patients with CXR stage II-IV sarcoidosis ( $P = 0.012$ ). (Table 4).  
36  
37  
38  
39

## 40 41 **DISCUSSION**

42  
43 A key step in linkage and association studies is to identify common risk variants  
44  
45 in different populations. To determine if common risk variants exist in distinct  
46  
47 populations, fifteen SNPs which span approximately 0.53 Mb of the ANXA11 gene,  
48  
49 were genotyped in samples from the patients with sarcoidosis and healthy controls in  
50  
51 a Chinese Han population. Recently, new sarcoidosis loci have been identified by  
52  
53 genome-wide association studies<sup>4 14</sup>. With the fast development of genome - wide  
54  
55  
56  
57  
58  
59  
60

1  
2  
3  
4 1 association studies, an increasing number of susceptibility loci for sarcoidosis have  
5  
6 2 been found in different populations <sup>4 14 21</sup>. However, these observations should be  
7  
8  
9 3 confirmed in other genetically independent populations. In this study, we conducted  
10  
11 4 the first large genetic association study of the ANXA11 gene in a Chinese Han  
12  
13  
14 5 population. The evidence of markers associated with sarcoidosis was presented, and  
15  
16 6 these markers were mapped to different locations in the ANXA11 gene (81897864 -  
17  
18  
19 7 81951001). The association signals in the region were identified, and some  
20  
21 8 significantly associated haplotypes also appeared this region.  
22

23  
24 9 Hoffman et al. reported an association between the T allele of the non -  
25  
26 10 synonymous SNP rs1049550 and significantly decreased risk of sarcoidosis in a  
27  
28  
29 11 German population <sup>4</sup>. Similar results were also obtained in other two European  
30  
31 12 populations <sup>14 21</sup>. As a part of the sarcoidosis GWAS done in Americans <sup>22</sup>, we further  
32  
33  
34 13 confirmed this association in a Chinese Han population. In this study, the frequency of  
35  
36 14 ANXA11 rs1049550T allele was significantly lower in the patients with sarcoidosis  
37  
38  
39 15 than the healthy controls. There is interaction between rs2789679 and rs1049550.  
40  
41 16 Genotype frequency distribution revealed that, in rs1049550, CC genotype was  
42  
43  
44 17 significantly more in the patients with stage I sarcoidosis than the patients with stage  
45  
46 18 II-IV sarcoidosis. The “protective” effect of ANXA11 T allele increased with the  
47  
48  
49 19 number of its copies in the genotype, which is consistent with the result obtained in  
50  
51 20 the patients with sarcoidosis in a German population <sup>4</sup>, Furthermore, the T allele  
52  
53  
54 21 carriers among the patients were protected from infiltration of lung parenchyma  
55  
56 22 (radiographic stages II-IV) <sup>21</sup>. We have also demonstrated that rs1049550 is  
57  
58  
59  
60



1  
2  
3  
4 1 significant cross - ethnically at the gene level after adjustment for the single SNP  
5  
6 2 association tests performed. The mechanism by which rs1049550 affects the  
7  
8 3 susceptibility to sarcoidosis is that the SNP may affect the function of the ANXA11  
9  
10 4 protein rather than affect its expression. In humans, the ANXA11 protein consists of  
11  
12 5 an N - terminalproline - tyrosine - glycine (PYG) - rich region, followed by four  
13  
14 6 annexin core domains. The rs1049550 leads to an amino - acid exchange (basic  
15  
16 7 arginine to a polar cysteine) at the evolutionarily conserved position 230 (R230C) in  
17  
18 8 the first annexin domain, which is responsible for  $\text{Ca}^{2+}$  - dependent trafficking of the  
19  
20 9 protein in the cell <sup>23</sup>.

21  
22  
23  
24  
25  
26 10 In the GWAS conducted by Hofmann et al <sup>4</sup>, the strongest association signal was  
27  
28 11 observed for rs2789679. This marker is located in the 3'-UTR of the ANXA11 gene.  
29  
30 12 The T allele had a frequency of 35% among the patients with sarcoidosis and 44% in  
31  
32 13 the healthy controls, with 13% of the patients with sarcoidosis and 19% of controls  
33  
34 14 being TT homozygous. Fine-mapping in the Black Women's Health Study (BWHS)  
35  
36 15 revealed rs2819941 to be the top SNP, associated with a non-significant ( $P = 0.06$ )  
37  
38 16 reduction in the risk of sarcoidosis (17% reduction per copy of the C-allele). In this  
39  
40 17 case-control association study, the frequency of the T allele in rs2789679 and the  
41  
42 18 rs2819941 C allele frequency in the patients with sarcoidosis was significantly lower  
43  
44 19 than that in the healthy controls. Several lines of evidence suggest that the observed  
45  
46 20 association is unlikely to be an artifact. First, both the single-SNP and the  
47  
48 21 haplotype-based association analyses support the current finding. Second, our samples  
49  
50 22 were from the same geographical region, excluding the . Finally, consistent results  
51  
52  
53  
54  
55  
56  
57  
58  
59  
60

1 were obtained from two genetically independent populations (Chinese Han and  
2 Europeans). Collectively, our results confirmed the strong association between  
3 ANXA11 polymorphisms and sarcoidosis, suggesting that ANXA11 represents a  
4 strong genetic risk factor for sarcoidosis.

5 We further investigated the interaction among polymorphisms and observed  
6 strong LD. The haplotype analysis revealed that significantly more C - C (block 2,  
7 rs1049550 - rs2573351) and significantly fewer T - C haplotypes (block 2) were  
8 found in the patients with sarcoidosis. These results indicated that the patients with C  
9 - C (block 2) haplotypes of the ANXA11 gene were more prone to sarcoidosis.  
10 Significantly higher frequencies of T - C haplotypes were detected in the healthy  
11 controls than in the patients with sarcoidosis, suggesting that they may show  
12 protective effects against sarcoidosis. Our sample size can detect SNP and haplotype  
13 associations with 90% and 85% power, respectively, at a false positive rate of 5%,  
14 disease prevalence of 1%, disease allele / haplotype frequency of 0.05 / 0.03, and a  
15 presumed odds ratio (OR) of 1.5. To some extent, this finding further supports a role  
16 of ANXA11 polymorphisms in sarcoidosis, while ethnic group difference may exist.

17 In conclusion, our study suggests a potential role of the ANXA11 SNPs and their  
18 related haplotypes in the genetic susceptibility to sarcoidosis. Further studies are  
19 needed to investigate how these SNPs affect the function of ANXA11.

## 20 **Contributors**

21 LG Zhang was involved in conception and design of the study, acquisition of  
22 patient data, genotyping and drafted the paper. ZJ Xiao and GC Shi were involved in

1  
2  
3  
4  
5  
6  
7  
8  
9  
10  
11  
12  
13  
14  
15  
16  
17  
18  
19  
20  
21  
22  
23  
24  
25  
26  
27  
28  
29  
30  
31  
32  
33  
34  
35  
36  
37  
38  
39  
40  
41  
42  
43  
44  
45  
46  
47  
48  
49  
50  
51  
52  
53  
54  
55  
56  
57  
58  
59  
60

1 design of the study, genotyping and interpretation of results. J Huang and CX Zhang  
2 were involved in the design of the study, acquisition of patient data and interpretation  
3 of result. All authors revised the draft paper.

For peer review only

1  
2  
3  
4 **Funding**

5  
6 The project was supported by the Research and Development Foundation of  
7  
8  
9 Science and Technology of Henan Province (2012k15).

10  
11 **Contributorship Statement**

12  
13  
14 LG Zhang was involved in conception and design of the study, acquisition of  
15  
16 patient data, genotyping and drafted the paper. ZJ Xiao and GC Shi were involved in  
17  
18 design of the study, genotyping and interpretation of results. J Huang and CX Zhang  
19  
20 were involved in design of the study, acquisition of patient data and interpretation of  
21  
22 result. All authors revised the draft paper.  
23  
24

25  
26 **Competing interests**

27  
28  
29 None.

30  
31 **Data sharing statement**

32  
33  
34 No additional data are available.  
35

36  
37 **Patient consent**

38  
39  
40 Obtained.

41  
42 **Ethics approval**

43  
44  
45 Ethics approval was provided by the First Hospital Affiliated to the Xinxiang  
46  
47 Medical College.  
48

49  
50 **Provenance and peer review**

51  
52  
53 Not commissioned; externally peer reviewed.  
54  
55

56  
57  
58  
59  
60

1  
2  
3  
4 **Reference**  
5

- 6 1. Iannuzzi MC, Rybicki BA, Teirstein AS. Sarcoidosis. *N Engl J Med* 2007;  
7  
8 357:2153-65.  
9  
10 2. Baughman RP, Lower EE, du Bois RM. Sarcoidosis. *Lancet* 2003;361:1111-8  
11  
12 3. Grunewald J. Review: role of genetics in susceptibility and outcome of sarcoidosis.  
13  
14 *Semin Respir Crit Care Med* 2010;31:380-9.  
15  
16 4. Hofmann S, Franke A, Fischer A, *et al.* Genome-wide association study identifies  
17  
18 ANXA11 as a new susceptibility locus for sarcoidosis. *Nat Genet*  
19  
20 2008;40:1103-6.  
21  
22 5. Gerke V, Moss SE. Annexins: from structure to function. *Physiol Rev*  
23  
24 2002;82:331-71.  
25  
26 6. Farnaes L, Ditzel HJ. Dissecting the cellular functions of annexin XI using  
27  
28 recombinant human annexin XI-specific autoantibodies cloned by phage  
29  
30 display. *J Biol Chem* 2003;278:33120-6.  
31  
32 7. Tomas A, Futter C, Moss SE. Annexin 11 is required for midbody formation and  
33  
34 completion of the terminal phase of cytokinesis. *J Cell Biol* 2004;165:813-22.  
35  
36 8. Petzmann S, Maercker C, Markert E, *et al.* Enhanced proliferation and decreased  
37  
38 apoptosis in lung lavage cells of sarcoidosis patients. *Sarcoidosis Vasc Diffuse*  
39  
40 *Lung Dis* 2006;23:190-200  
41  
42 9. Dubaniewicz A, Trzonkowski P, Dubaniewicz-Wybieralska M, *et al.* Comparative  
43  
44 analysis of mycobacterial heat shock proteins-induced apoptosis of peripheral  
45  
46 blood mononuclear cells in sarcoidosis and tuberculosis. *J Clin Immunol*  
47  
48  
49  
50  
51  
52  
53  
54  
55  
56  
57  
58  
59  
60

- 1  
2  
3  
4 1 2006;26:243-50.  
5  
6 2 10. Agostini C, Trentin L, Facco M, *et al.* Role of IL-15, IL-2, and their receptors in  
7  
8 3 the development of T cell alveolitis in pulmonary sarcoidosis. *J Immunol*  
9  
10 4 1996;157:910-8  
11  
12 5 11. Jullien D, Sieling PA, Uyemura K, *et al.* IL-15, an immunomodulator of T cell  
13  
14 6 responses in intracellular infection. *J Immunol* 1997;158:800-6  
15  
16 7 12. Muller-Quernheim J, Schurmann M, Hofmann S, *et al.* Genetics of sarcoidosis.  
17  
18 8 *Clin Chest Med* 2008;29:391-414.  
19  
20 9 13. Morais A, Lima B, Peixoto M, *et al.* Annexin A11 gene polymorphism (R230C  
21  
22 10 variant) and sarcoidosis in a Portuguese population. *Tissue antigens*  
23  
24 11 2013;82:186-91.  
25  
26 12 14. Li Y, Pabst S, Kubisch C, *et al.* First independent replication study confirms the  
27  
28 13 strong genetic association of ANXA11 with sarcoidosis. *Thorax*  
29  
30 14 2010;65:939-40.  
31  
32 15 15. Gabriel SB, Schaffner SF, Nguyen H, *et al.* The structure of haplotype blocks in  
33  
34 16 the human genome. *Science* 2002;296:2225-9.  
35  
36 17 16. Barrett JC, Fry B, Maller J, *et al.* Haploview: analysis and visualization of LD and  
37  
38 18 haplotype maps. *Bioinformatics* 2005;21:263-5.  
39  
40 19 17. Curtis D, Knight J, Sham PC. Program report: GENECOUNTING support  
41  
42 20 programs. *Ann Hum Genet* 2006;70:277-9.  
43  
44 21 18. Zhao JH, Curtis D, Sham PC. Model-free analysis and permutation tests for allelic  
45  
46 22 associations. *Hum Hered* 2000;50:133-9.  
47  
48  
49  
50  
51  
52  
53  
54  
55  
56  
57  
58  
59  
60

- 1  
2  
3  
4 19. Zhao JH, Lissarrague S, Essioux L, et al. GENECOUNTING: haplotype analysis  
5  
6 with missing genotypes. *Bioinformatics* 2002;18:1694-5  
7  
8  
9 20. Zhao JH, Sham PC. Generic number systems and haplotype analysis. *Comput*  
10  
11 *Methods Programs Biomed* 2003;70:1-9  
12  
13  
14 21. Mrazek F, Stahelova A, Kriegova E, et al. Functional variant ANXA11 R230C:  
15  
16 true marker of protection and candidate disease modifier in sarcoidosis. *Genes*  
17  
18 *Immun* 2011;12:490-4.  
19  
20  
21 22. Levin AM, Iannuzzi MC, Montgomery CG, et al. Association of ANXA11 genetic  
22  
23 variation with sarcoidosis in African Americans and European Americans.  
24  
25 *Genes Immun* 2013;14:13-8.  
26  
27  
28  
29 24. Tomas A, Moss SE. Calcium- and cell cycle-dependent association of annexin 11  
30  
31 with the nuclear envelope. *J Biol Chem* 2003;278:20210-6.  
32  
33  
34  
35  
36  
37  
38

### 15 **Figure Legend**

16 **Fig. 1** The LD plot of the fifteen SNPs in the ANXA11 gene. Values in squares are the  
17 pair-wise calculation of  $r^2$  (left) or  $D'$  (right). Black squares indicate  $r^2 = 1$  (i.e. perfect  
18 LD between a pair of SNPs). Empty squares indicate  $D' = 1$  (i.e. complete LD  
19 between a pair of SNPs).

20 **Supplemental Fig. 1** The structure of the human ANXA11 gene and 15 SNPs located  
21 on the gene.

22

**Table 1** Genotypic and allelic frequencies of ANXA11 polymorphisms in the controls and patients with sarcoidosis

| Variable     | Controls (n=418 ) |      | Sarcoidosis (n=412) |      | P-value <sup>a</sup> | OR, 95% CI      |
|--------------|-------------------|------|---------------------|------|----------------------|-----------------|
|              | No.               | %    | No.                 | %    |                      |                 |
| rs2789679    |                   |      |                     |      | 0.0007               |                 |
| AA           | 79                | 18.9 | 132                 | 32.0 | 0.0002               | 0.49, 0.36-0.68 |
| AT           | 225               | 53.8 | 186                 | 45.2 | 0.012                | 1.42, 1.08-1.87 |
| TT           | 114               | 27.3 | 94                  | 22.8 | 0.140                | 1.27, 0.93-1.74 |
| Per T allele | 383               | 45.8 | 450                 | 54.6 | 0.0003               | 0.70, 0.58-0.85 |
| rs1049550    |                   |      |                     |      | 0.0002               |                 |
| CC           | 154               | 36.8 | 208                 | 50.5 | 0.0007               | 0.57, 0.43-0.75 |
| CT           | 190               | 45.5 | 170                 | 41.3 | 0.221                | 1.19, 0.90-1.56 |
| TT           | 74                | 17.7 | 34                  | 8.3  | 0.0008               | 2.39, 1.55-3.68 |
| Per T allele | 338               | 40.4 | 238                 | 28.8 | 0.0007               | 0.60, 0.49-0.73 |
| rs2819941    |                   |      |                     |      | 0.0002               |                 |
| CC           | 114               | 27.3 | 94                  | 22.8 | 0.141                | 1.27, 0.93-1.74 |
| CT           | 226               | 54.1 | 190                 | 46.1 | 0.021                | 1.38, 1.05-1.81 |
| TT           | 78                | 18.7 | 128                 | 31.1 | 0.0004               | 0.51, 0.37-0.70 |
| Per T allele | 382               | 45.7 | 446                 | 54.1 | 0.001                | 0.71, 0.59-0.87 |

<sup>a</sup> P-value was calculated by 2×3 and 2×2 chi-squared tests based on codominant, dominant for the rare allele, heterosis and recessive for the rare allele models of inheritance.

Alpha value is adjusted by Bonferroni correction and statistically significant results (P<0.003)



1

2

3

**Table 2** ANXA11 haplotype in block 2 frequencies and the results of their associations with risk of sarcoidosis

| Haplotype |           |           | Genecounting (frequency %) |          |                              |                              |
|-----------|-----------|-----------|----------------------------|----------|------------------------------|------------------------------|
| ID        | rs1049550 | rs2573351 | Cases                      | Controls | <i>P</i> -value <sup>a</sup> | Global <i>P</i> <sup>b</sup> |
| HAP1      | T         | C         | 27.7                       | 39.7     | 0.001                        | 0.003                        |
| HAP2      | C         | C         | 19.9                       | 7.4      | 0.0001                       |                              |
| HAP3      | C         | T         | 50.5                       | 51.0     | 0.892                        |                              |

4

<sup>a</sup> Based on 10,000 permutations.

5

<sup>b</sup> Based on comparison of frequency distribution of all haplotypes for the combination of SNPs.

6

7

8

9

10

11

12

13

14

15

16

17

18

19

20

21

22

23

24

25

26

27

28

29

30

31

32

33

34

35

36

37

38

39

**Table 3** ANXA11 haplotype in block 3 frequencies and the results of their associations with risk of sarcoidosis

| Haplotype |           |           | Genecounting (frequency %) |          |                              |                              |
|-----------|-----------|-----------|----------------------------|----------|------------------------------|------------------------------|
| ID        | rs2789695 | rs2573356 | Cases                      | Controls | <i>P</i> -value <sup>a</sup> | Global <i>P</i> <sup>b</sup> |
| HAP1      | C         | T         | 33.7                       | 34.9     | 0.718                        | 0.045                        |
| HAP2      | T         | T         | 15.3                       | 14.1     | 0.632                        |                              |
| HAP2      | T         | T         | 15.6                       | 14.1     | 0.565                        |                              |

<sup>a</sup> Based on 10,000 permutations.

<sup>b</sup> Based on comparison of frequency distribution of all haplotypes for the combination of SNPs.

**Table 4** Chest radiographic (CXR) stages of sarcoidosis patients by genotype of rs2789679, rs1049550 and rs2819941

| Stages         | rs2789679 (n, %) |              |              | rs1049550* (n, %) |              |              | rs2819941 (n, %) |              |              |
|----------------|------------------|--------------|--------------|-------------------|--------------|--------------|------------------|--------------|--------------|
|                | AA               | AT           | TT           | CC                | CT           | TT           | CC               | CT           | TT           |
| stage I        | 59<br>(30.1)     | 92<br>(47.0) | 45<br>(23.0) | 101<br>(51.5)     | 82<br>(41.8) | 13<br>(6.6)  | 47<br>(25.0)     | 88<br>(44.9) | 61<br>(31.1) |
| stages II - IV | 46<br>(27.6)     | 75<br>(44.9) | 46<br>(27.6) | 72<br>(43.1)      | 68<br>(40.7) | 27<br>(16.2) | 41<br>(24.6)     | 73<br>(43.7) | 53<br>(31.7) |
| $\chi^2, P$    | 1.041, 0.594     |              |              | 8.807, 0.012      |              |              | 0.052, 0.975     |              |              |

\*  $P$  values for genotype frequency distribution ( $P < 0.05$ ).

1  
2  
3  
4 1  
5  
6 2  
7  
8  
9 3  
10  
11 4  
12  
13  
14 5  
15  
16 6  
17  
18  
19 7  
20  
21  
22  
23  
24  
25  
26  
27  
28  
29  
30  
31  
32  
33  
34  
35  
36  
37  
38  
39  
40  
41  
42  
43  
44  
45  
46  
47  
48  
49  
50  
51  
52  
53  
54  
55  
56  
57  
58  
59  
60

For peer review only

1  
2  
3  
4 **Annexin A11 (ANXA11) gene polymorphisms are associated with sarcoidosis in a**  
5  
6 **Han Chinese population - a case-control study**  
7

8 LG Zhang, ZJ Xiao\*, GC Shi, J Huang, CX Zhang  
9

10  
11 ~~The Third Department of Tuberculosis~~~~Internal Medicine, the First Hospital Affiliated~~  
12 ~~to the Xinxiang Medical College—Tuberculosis, First Hospital Affiliated to the~~  
13 ~~Xinxiang Medical College, Xinxiang, Henan, PR China~~  
14  
15  
16  
17

18  
19 \*Corresponding author: Zhijian Xiao, The Third Department of Tuberculosis, the First  
20 Hospital Affiliated to the Xinxiang Medical College, Xinxiang, Henan, PR  
21 China.~~Internal Medicine—Tuberculosis~~~~the, First Hospital Affiliated to the Xinxiang~~  
22 ~~Medical College, Xinxiang, Henan, PR China~~  
23  
24  
25  
26  
27

28  
29 No.88 Jiankang Road, Weihui City, Henan, 463000, PR China  
30

31 E-mail: zhangligongys@163.com  
32

33  
34 Tel: +86 0373 - 4402229 (office)  
35

36 Fax: +86 0373 -4402251  
37

38  
39 **Key words:** Sarcoidosis; Annexin A11; Single-nucleotide polymorphism  
40

41 Word count: 2909  
42  
43  
44  
45  
46  
47  
48  
49  
50  
51  
52  
53  
54  
55  
56  
57  
58  
59  
60

## Abstract

**Objectives:** To further identify the single-nucleotide polymorphisms (SNPs) that contribute to the genetic susceptibility to sarcoidosis, we examined the potential association between sarcoidosis and fifteen SNPs of the ANXA11 gene.

**Design:** A case - control study.

**Setting:** A tuberculosis unit in a university-hospital of the university in China.

**Participants:** Participants included 412 patients with sarcoidosis and 418 healthy controls.

**Methods:** The selected SNPs were genotyped ~~in cases and controls by~~ using the MALDI-TOF in the MassARRAY system (Sequenom Inc., San Diego, CA, USA). Probes and primers were designed using the Assay Design Software (Sequenom, San Diego, CA, USA).

**Results:** The results showed that ~~statistical~~statistically significant differences were ~~observed~~found in the allelic or genotypic frequencies of the rs2789679, rs1049550 and rs2819941 in the ANXA11 gene ~~between the patients with sarcoidosis and the controls~~. The frequency of the T allele in rs2789679 ( $P = 0.0003$ , OR = 0.70, 95%CI = 0.58 - 0.85), ~~T allele in and~~ rs1049550 ( $P = 0.0007$ , OR = 0.62, 95%CI= 0.50 - 0.76), and ~~C allele the in~~ rs2819941 ~~C-allele frequency~~ ( $P = 0.001$ , OR = 0.71, 95%CI = 0.59 - 0.87) in the patients with sarcoidosis was significantly lower than that in the controls. ~~Furthermore, The~~ strong linkage disequilibrium (LD) was observed in four blocks ( $D' > 0.9$ ). In block 2 (rs1049550-rs2573351), the T - C haplotype occurred significantly less frequently ( $P = 0.001$ ), whereas the C - C haplotypes occurred more

1  
2  
3  
4 frequently ( $P = 0.0001$ ) in the patients with sarcoidosis than the controls. Furthermore,  
5  
6 e-Comparison of genotype frequency distribution revealed that, in rs1049550, CC  
7  
8 genotype was significantly more in the patients with chest radiographic (CXR) stage I  
9  
10 sarcoidosis than the patients with CXR stage II-IV sarcoidosis ( $P = 0.012$ ). significant  
11  
12 differences between chest radiographic (CXR) stage I and stages II–IV for rs1049550.  
13  
14 The significantly more CC genotype ( $P = 0.012$ ) were found in the patients with  
15  
16 stages I sarcoidosis.  
17  
18 –Conclusions: These findings point to a role for the polymorphisms of ANXA11  
19  
20 gene polymorphisms in sarcoidosis in a Han-ChineseChinese Han population, and  
21  
22 may be informative for future genetic or biological studies on sarcoidosis.  
23  
24  
25  
26  
27  
28  
29  
30  
31  
32  
33  
34  
35  
36  
37  
38  
39  
40  
41  
42  
43  
44  
45  
46  
47  
48  
49  
50  
51  
52  
53  
54  
55  
56  
57  
58  
59  
60

## Article summary

### Article focus

1. The first genome-wide association study (GWAS) in sarcoidosis conducted in a German population has revealed that the rs1049550 (C > T, Arg230Cys) located in exon 10 were associated with sarcoidosis.
2. ~~More studies should be performed to demonstrate the following item: w~~Whether these SNPs modulate the risk of sarcoidosis by themselves or whether they correlate with other causative SNPs and are repeated in other populations remain unclear.
3. We hypothesize that common variants in the ANXA11 gene may significantly contribute to the predisposition to develop sarcoidosis in a Chinese Han population.

### Key messages

1. ANXA11 rs2789679 (~~3'-UTR~~3'-UTR) ~~was found to be associated~~was significantly associated with sarcoidosis.
2. ANXA11 rs1049550 (exon 10) was significantly associated with sarcoidosis.
3. Another significant association was observed for rs2819941 (intron 14).

### Strengths and limitations of this study

1. A systematical screening of the Ffunctional SNPs in the promoter region, 5'- and 3'-UTR, exons of the ANXA11 gene, and the homogeneity of the study subjects representing the Chinese Han are the main strengths of this study.~~were systematically screened and homogeneity of the study subjects, representing the Han ChineseChinese Han, is the main strength of the current study.~~
2. The lack of data proving the positive association observed for rs2789679 and



1  
2  
3  
4 [rs1049550 is a potential limitation of this study. Furthermore, the association of the](#)  
5 [serum level of ANXA11 with sarcoidosis still needs to be investigated.](#)~~Functional~~  
6 ~~characterization is the potential limitation of the study that could have further helped~~  
7 ~~in proving the positive association observed for rs2789679 and rs1049550. The lack~~  
8 ~~of correlation of serum ANXA11 levels are needed to investigate.~~

## 16 INTRODUCTION

17  
18  
19 Sarcoidosis is a systemic autoimmune disease characterized by destructive, non-  
20 ~~caseating~~ epithelioid granulomatous lesions, with accumulated phagocytes and  
21 ~~caseating~~ epithelioid granulomatous lesions, with accumulated phagocytes and  
22 activated CD4<sup>+</sup> T helper type 1 lymphocytes<sup>1 2</sup>. The typical manifestations of  
23 sarcoidosis include bilateral hilar lymphadenopathy, pulmonary infiltration and ocular  
24 and skin lesions. The clinical course and prognosis of sarcoidosis are variable. The  
25 acute forms of sarcoidosis such as Löfgren's syndrome (LS) can resolve  
26 spontaneously in most cases. However, chronic pulmonary sarcoidosis may progress  
27 to lung fibrosis ~~which and~~ eventually ~~result in causes~~ respiratory failure. Recent  
28 studies have demonstrated that sarcoidosis can occur in a pattern of family clustering,  
29 and its racial incidence is also different, suggesting that some genetic factors may  
30 contribute to the risk and severity of sarcoidosis<sup>1 3</sup>.

31  
32  
33  
34  
35  
36  
37  
38  
39  
40  
41  
42  
43  
44  
45  
46 The Annexin gene family is involved in the etiology of several autoimmune and  
47 chronic diseases<sup>4 5</sup>. One member of the Annexin gene family, ANXA11, located on  
48 chromosome 10q22.3, is involved in calcium signaling, apoptosis, vesicle trafficking,  
49 cell growth and terminal phase of cell division<sup>5-7</sup>. In this context, the development  
50 and maintenance of the granulomatous inflammation in sarcoidosis have been  
51  
52  
53  
54  
55  
56  
57  
58  
59  
60

repeatedly associated with the impaired apoptosis of activated inflammatory cells<sup>8 9</sup>.

~~In most patients with sarcoidosis~~Most of the early-stage sarcoidosis, ~~the early stages of this disease are~~ is characterized by mononuclear cell alveolitis dominated by activated CD4<sup>+</sup> T cells and macrophages. Between these cells, the uncoordinated interplay results in the formation of typical non—caseating granulomas. The mechanism by which the granulomas resolve has not been fully elucidated. However, it is generally assumed that the induction of apoptosis and ~~or~~ by the withdrawal of inflammatory cytokines participates in the disappearance of granulomas<sup>10 11</sup>. In the patients with sarcoidosis, their peripheral blood monocytes were characterized by apoptosis<sup>9</sup>.

In previous studies, case - control ~~family~~ ‘hypothesis - driven’ studies and low density linkage scans were used to identify genetic factors conferring the genetic susceptibility to sarcoidosis<sup>12</sup>. Notably, the first genome - wide association study (GWAS) in sarcoidosis conducted in a German population has recently revealed an association: the leading rs2789679 SNP (single - nucleotide polymorphism) located in the 3’—untranslated region (3’—UTR) and a common nonsynonymous SNP (rs1049550, C > T, Arg230Cys) were associated with the increased risk of sarcoidosis<sup>4 13</sup>. This association has recently been supported by another report from the same population<sup>14</sup>. Thus, more studies should be performed to demonstrate the following items: whether these SNPs modulate the risk of sarcoidosis by themselves or whether they correlate with other causative SNPs and are repeated in other populations. The published studies about the association of sarcoidosis and ANXA11—association

1  
2  
3  
4 | [studies for ANXA11](#) are summarized in Supplemental table 21. We hypothesize that  
5  
6 common variants in the ANXA11 gene may significantly contribute to the  
7  
8 predisposition to develop sarcoidosis.  
9

10  
11 In this study, we investigated fifteen loci in a Chinese population from He'nan  
12  
13 province (China) to verify the putative association between ANXA11 polymorphisms  
14  
15 and sarcoidosis.  
16  
17

## 18 19 **SUBJECTS AND METHODS**

### 20 21 **Subjects**

22  
23 Four hundred and twelve patients with sarcoidosis (mean  $\pm$  SD age:  $53.6 \pm 4.6$   
24  
25 years; 155 men and 257 women) were recruited from our hospital between May 2005  
26  
27 and March 2013. Sarcoidosis was diagnosed by the evidence of non—caseating  
28  
29 epitheloid cell granuloma in biopsy specimens and chest radiographic abnormalities.  
30  
31  
32 Chronic sarcoidosis was defined as a disease over at least 2 years or at least two  
33  
34 episodes in a lifetime. A acute sarcoidosis was defined as one episode of acute  
35  
36 sarcoidosis which had totally resolved at the date of the examination. The control  
37  
38 group consisted of 418 unrelated healthy subjects (mean  $\pm$  SD age:  $54.2 \pm 5.3$  years;  
39  
40 160 men and 258 women) who underwent health examinations in the Medical  
41  
42 Examination Center of the First Affiliated Hospital of the Xinxiang Medical College  
43  
44 (Xinxiang, China) between Oct 2009 and Sept 2013. None of the individuals in the  
45  
46 control group had a history of lung diseases or showed any symptoms of the lung or  
47  
48 other diseases by chest radiography or laboratory blood tests. Participants were  
49  
50 excluded if they: were taking other prescribed medications that could affect the  
51  
52  
53  
54  
55  
56  
57  
58  
59  
60

1  
2  
3  
4 central nervous system; had a history of seizures, hematological diseases, or severe  
5  
6 liver or kidney impairment; or were pregnant. No familial relationship was known  
7  
8 between the study participants. The study was performed according to the Guidelines  
9  
10 of the Medical Ethical Committee of Xinxiang Medical College (Xinxiang, China).  
11  
12 Written informed consent was obtained from each participant in this study.  
13  
14

### 15 16 **SNP selection**

17  
18 Tagging SNPs were selected from the catalogs of the International HapMap  
19  
20 Project. The rs2789679 and rs2245168 are located in 5'-UTR, rs2236558 in intron 6,  
21  
22 rs7067644 and rs12763624 in intron 8, rs1049550 in exon 10, rs2573351 in intron 13,  
23  
24 rs10887581, rs11201989, rs2573353, rs2789695, rs2573356, rs2819945, rs11202059  
25  
26 and rs2819941 in intron 14 (Supplemental figure 1). Marker selection was based on  
27  
28 the following criteria. (a) We used the CHB data from the HapMap (release 27) to  
29  
30 select tagSNPs for ANXA11. (b) We restricted our search for tagSNPs from base pair  
31  
32 80155124 to 80205677. (c) Further, we limited the SNPs to tag to those with a minor  
33  
34 allele frequency  $\geq 0.2$  in the CHB. (d) Based on these restrictions, there were a total  
35  
36 of 29 SNPs. (e) Using HAPLOVIEW with an  $r^2$  threshold  $\geq 0.8$ , 15 tagSNP were  
37  
38 selected and used for subsequent analyses.

39  
40  
41 ~~Marker selection was done according to previous studies<sup>4-12-14-15</sup>, and preliminary~~  
42  
43 ~~analysis was performed using the HapMap data and the following criteria. First, we~~  
44  
45 ~~examined tagSNPs in the Haploview (v4.2), using the CHB population and a minor~~  
46  
47 ~~allele frequency cut-off (MAF)  $\geq 5\%$  (HapMap Data Release 27). We found that~~  
48  
49 ~~there were a total of 29 potential tagSNPs in all. As a first screen of the most common~~  
50  
51  
52  
53  
54  
55  
56  
57  
58  
59  
60

1  
2  
3  
4 SNPs in the sarcoidosis sample from an Eastern Chinese Han population, a MAF  $\geq 20\%$   
5  
6 with pair wise tagging and  $r^2 \geq 0.8$ <sup>16</sup> was used as the cut off when choosing  
7  
8 tagSNPs. Second, the LD pattern of this gene was determined in the Chinese  
9  
10 population using the preliminary data from the HapMap. Five LD blocks across the  
11  
12 ANXA11 were defined using Haploview's 'confidence intervals' method<sup>17,18</sup>. These  
13  
14 SNPs were further analyzed in an association study.  
15  
16  
17  
18

### 19 Genotyping

20  
21 Peripheral blood was collected from a vein into a sterile tube coated with  
22  
23 ethylenediamine tetraacetic acid (EDTA). Plasma samples were stored at -20°C.  
24  
25 Genomic DNA was extracted from the frozen peripheral blood samples using a  
26  
27 QIAmp Blood Mini Kit (Qiagen Inc., Valencia, CA, USA) according to the  
28  
29 manufacturer's protocols. The selected SNPs were genotyped in cases and controls by  
30  
31 using the MALDI-TOF in the MassARRAY system (Sequenom Inc., San Diego,  
32  
33 CA, USA). Probes and primers were designed using the Assay Design Software  
34  
35 (Sequenom, San Diego, CA, USA). The completed genotyping reactions were spotted  
36  
37 onto a 384 well spectroCHIP (Sequenom) using the MassARRAY Nanodispenser  
38  
39 (Sequenom) and determined by the matrix - assisted laser desorption ionization time -  
40  
41 of - flight mass spectrometer. Genotype calling was performed in realtime with the  
42  
43 MassARRAY RT software version 3.0.0.4 and analyzed using the MassARRAY Typer  
44  
45 software version 3.4 (Sequenom).  
46  
47  
48  
49  
50  
51  
52

### 53 Statistical analysis

54  
55  
56 All data were analyzed using the SPSS 17.0 software (SPSS Inc., Chicago, IL,  
57  
58  
59  
60

1  
2  
3  
4 USA). Hardy-Weinberg equilibrium ~~were~~was evaluated by Chi—square tests.  
5  
6 Differences between the cases and controls in the frequency of the alleles, genotypes  
7  
8 and haplotypes were evaluated by the Fisher’s exact test or the Pearson Chi—square  
9  
10 test. Unconditional logistic regression was used to calculate the odds ratio (OR) and  
11  
12 95% confidence interval (CI) in independent association between each locus and the  
13  
14 presence of sarcoidosis. ~~Logistic regression~~Generalized linear regression was used to  
15  
16 evaluate the interaction effects between gene and gender or age. Gender and age of  
17  
18 subjects were treated as covariants in binary logistic regression. ~~P—~~ values ~~was~~were  
19  
20 calculated based on codominant, dominant for the rare allele, heterosis and recessive  
21  
22 for the rare allele models of inheritance. The Bonferroni correction was used to adjust  
23  
24 the test level when multiple comparisons were conducted, and the *P* value was  
25  
26 divided by the total number of loci. Haplotype blocks were defined according to the  
27  
28 criteria developed by Gabriel et al. <sup>15</sup>. Pair—wise LD statistics ( $D'$  and  $r^2$ ) and  
29  
30 haplotype frequency were calculated, and haplotype blocks were constructed using  
31  
32 the Haploview 4.0 <sup>16</sup>. To ensure that the LD blocks most closely reflect the population  
33  
34 level LD patterns, definition of the blocks were based on the control samples alone.  
35  
36 The haplotype frequencies were estimated using GENECOUNTING, which computes  
37  
38 maximum - likelihood estimates of haplotype frequencies from unknown phase data  
39  
40 by utilizing an expectation - maximization algorithm <sup>17-20</sup>. The significance of any  
41  
42 haplotypic association was evaluated using a likelihood ratio test, followed by  
43  
44 permutation testing that compared estimated haplotype frequencies in cases and  
45  
46 controls <sup>17 19</sup>.  
47  
48  
49  
50  
51  
52  
53  
54  
55  
56  
57  
58  
59  
60

## RESULTS

The genotype distribution of the fifteen polymorphisms was consistent with the Hardy-Weinberg equilibrium ( $P > 0.05$ ). The analysis of strong LD in the patients with sarcoidosis and healthy controls revealed that 2 SNPs (rs2245168, rs2236558), 2 SNPs (rs1049550, rs2573351), 2 SNPs (rs2789695, rs2573356) and 3 SNPs (rs2819945, rs11202059, rs2819941) were located in haplotype block 1, block 2, block 3 and block 4 ( $D' > 0.9$ , Fig. 21). The genotype distribution, allelic frequencies, and haplotypes in the patients with sarcoidosis and healthy controls are showed in [Tables 21, 3 and Supplemental table 2, table 4 and table 5.](#)

Comparison of genotype and allele frequency distribution revealed significant differences between the patients with sarcoidosis and healthy controls for 3 SNPs: rs2789679, rs1049550 and rs2819941. The frequency of the T allele in rs2789679 ( $P = 0.0003$ , OR = 0.70, 95%CI = 0.58 - 0.85), T allele in rs1049550 ( $P = 0.0007$ , OR = 0.62, 95%CI = 0.50 - 0.76), and C allele in rs2819941 ( $P = 0.001$ , OR = 0.71, 95%CI = 0.59 - 0.87) in the patients with sarcoidosis was significantly lower than that in the controls, and these differences remained statistically significant after Bonferroni corrections. [We presented a multi-SNP model of sarcoidosis risk. We screen out the most significant model to predict the risk by forward stepwise strategy in logistic regression, and found that a model includes rs2789679 and rs1049550 is the best one \(Supplemental table 3\), which suggests that there is a interaction between them.](#)

~~There were no interactions among rs2789679, rs1049550 and rs2819941 ( $P > 0.05$ ).~~

1  
2  
3  
4 We performed an association analysis to determine whether the haplotype was  
5  
6 associated with the risk of sarcoidosis (Global  $P < 0.05$  in block 2 and block 3).  
7  
8 Compared with the ~~healthy~~ controls, the T - C haplotype occurred significantly less  
9  
10 frequently ( $P = 0.001$ ) ~~and but~~ the C - C haplotypes occurred more frequently ( $P =$   
11  
12  $0.0001$ ) in block 2 (-rs1049550 - rs2573351) in the patients with sarcoidosis.—  
13  
14

15  
16 To assess particular disease phenotypes, the patients with sarcoidosis were  
17  
18 divided into the subgroups according to their chest radiographic (CXR) stage. CXR  
19  
20 stage I (isolated bilateral hilar lymphadenopathy): N = 196; CXR stages II - IV  
21  
22 (infiltration of parenchyma): 167; CXR stage 0 (absence on pulmonary disease): N =  
23  
24 28; the information on CXR stage was not available for 21 patients. Genotype  
25  
26 frequency distribution revealed that, in rs1049550, CC genotype was significantly  
27  
28 more in the patients with chest radiographic (CXR) stage I sarcoidosis than the  
29  
30 patients with CXR stage II-IV sarcoidosis ( $P = 0.012$ ). ~~Comparison of genotype~~  
31  
32 ~~frequency distribution revealed significant differences between stage I and stages II-~~  
33  
34 ~~IV for rs1049550. The significantly more CC genotype ( $P = 0.012$ ) were found in the~~  
35  
36 ~~patients with stage I sarcoidosis (table Table 34).~~  
37  
38  
39  
40  
41  
42  
43

## 44 DISCUSSION

45  
46 A key step in linkage and association studies is to identify common risk variants  
47  
48 in different populations. To determine if common risk variants exist in distinct  
49  
50 populations, fifteen SNPs which span approximately 0.53 Mb of the ANXA11 gene,  
51  
52 were genotyped in samples from the patients with sarcoidosis and healthy controls in  
53  
54 a Chinese Han population. Recently, new sarcoidosis loci have been identified by  
55  
56  
57  
58  
59  
60



1  
2  
3 genome-wide association studies<sup>4,14</sup>. With the fast development of genome-wide  
4  
5  
6 association studies, an increasing number of susceptibility loci for sarcoidosis have  
7  
8  
9 been ~~reported~~ found in different populations<sup>4,14,21</sup>. However, these observations  
10  
11 should be confirmed in other genetically independent populations. In this study, we  
12  
13 conducted the first large genetic association study of the ANXA11 gene in a Chinese  
14  
15 Han population. The evidence of markers associated with sarcoidosis was presented,  
16  
17 and these markers were mapped to different locations in the ANXA11 gene  
18  
19 (81897864 - 81951001). The association signals in the region were identified, and  
20  
21 some significantly associated haplotypes also appeared this region.  
22  
23  
24

25  
26 Hoffman et al. reported an association between the T allele of the non -  
27  
28 synonymous SNP rs1049550 and significantly decreased risk of sarcoidosis in a  
29  
30 German population<sup>4</sup>. Similar results were also obtained in other two European  
31  
32 populations<sup>14,21</sup>. As a part of the sarcoidosis GWAS done in Americans<sup>22</sup>, we further  
33  
34 confirmed this association in a Chinese Han population. In this study, the frequency of  
35  
36 ANXA11 rs1049550T allele was significantly lower in the patients with sarcoidosis  
37  
38 than the healthy controls. There is interaction between rs2789679 and rs1049550.  
39  
40 Genotype frequency distribution revealed that, in rs1049550, CC genotype was  
41  
42 significantly more in the patients with stage I sarcoidosis than the patients with stage  
43  
44 II-IV sarcoidosis ~~Comparison of stages II-IV, the significantly more CC genotypewas~~  
45  
46 ~~found in the patients with stages I sarcoidosis.~~ The “protective” effect of ANXA11 T  
47  
48 allele increased with the number of its copies in the genotype, which is consistent  
49  
50 with the result obtained in the patients with sarcoidosis in a German population<sup>4</sup>,  
51  
52  
53  
54  
55  
56  
57  
58  
59  
60

1  
2  
3  
4 Furthermore, the T allele carriers among the patients were protected from infiltration  
5  
6 of lung parenchyma (radiographic stages II-IV) <sup>21</sup>. We have also demonstrated that  
7  
8 rs1049550 is significant cross - ethnically at the gene level after adjustment for the  
9  
10 single SNP association tests performed. The mechanism by which rs1049550 affects  
11  
12 the susceptibility to sarcoidosis ~~may be~~ that the SNP may affect the function of the  
13  
14 ANXA11 protein rather than affect its expression. In humans, the ANXA11 protein  
15  
16 consists of an N - terminal proline - tyrosine - glycine (PYG) - rich region, followed  
17  
18 by four annexin core domains. The rs1049550 leads to an amino - acid exchange  
19  
20 (basic arginine to a polar cysteine) at the evolutionarily conserved position 230  
21  
22 (R230C) in the first annexin domain, which is responsible for Ca<sup>2+</sup> - dependent  
23  
24 trafficking of the protein in the cell <sup>23</sup>.

25  
26  
27  
28  
29  
30  
31 In the GWAS conducted by Hofmann et al <sup>4</sup>, the strongest association signal was  
32  
33 observed for rs2789679. This marker is located in the 3' UTR of the ANXA11 gene.  
34  
35 The T allele had a frequency of 35% among the patients with sarcoidosis and 44% in  
36  
37 the healthy controls, with 13% of the patients with sarcoidosis and 19% of controls  
38  
39 being TT homozygous. Fine-mapping in the Black Women's Health Study (BWHS)  
40  
41 revealed rs2819941 to be the top SNP, associated with a non-significant ( $P = 0.06$ )  
42  
43 reduction in the risk of sarcoidosis ~~risk~~ (17% reduction per copy of the C-allele). In  
44  
45 this case-control association study, the frequency of the T allele in rs2789679 and  
46  
47 the rs2819941 C allele frequency in the patients with sarcoidosis was significantly  
48  
49 lower than that in the healthy controls. Several lines of evidence suggest that the  
50  
51 observed associations ~~are~~ unlikely to be an artifact. First, both the single SNP and  
52  
53  
54  
55  
56  
57  
58  
59  
60

1  
2  
3  
4 the haplotype—based association analyses support the current finding. Second, our  
5 samples were from the same geographical region, excluding the population  
6 stratification is an impossible reason, because all of our samples were from the same  
7 geographical region. Finally, consistent results were obtained from two genetically  
8  
9 independent populations (Chinese Han and Europeans). Collectively, our results  
10  
11 confirmed the strong association between ~~variations in the~~ ANXA11 polymorphisms  
12 gene and sarcoidosis, ~~and~~ suggesting that ANXA11 represents a strong genetic risk  
13  
14 factor for sarcoidosis.  
15  
16  
17  
18  
19  
20  
21  
22  
23

24 We further investigated the interaction among polymorphisms and observed  
25 strong LD. The haplotype analysis revealed that significantly more C - C (block 2,  
26 rs1049550 - rs2573351) and significantly fewer T - C haplotypes (block 2) were  
27  
28 found in the patients with sarcoidosis. These results indicated that the patients with C  
29  
30 - C (block 2) haplotypes of the ANXA11 gene were more prone to sarcoidosis.  
31  
32 Significantly higher frequencies of T - C haplotypes were detected in the healthy  
33  
34 controls than in the patients with sarcoidosis, suggesting that they may show ~~a~~  
35  
36 protective effects against sarcoidosis. Our sample size can detect SNP and haplotype  
37  
38 associations with 90% and 85% power, respectively, at a false positive rate of 5%,  
39  
40 disease prevalence of 1%, disease allele / haplotype frequency of 0.05 / 0.03, and a  
41  
42 presumed odds ratio (OR) of 1.5. To some extent, this finding further supports a role  
43  
44 of ANXA11 polymorphisms in sarcoidosis, while ethnic group difference may exist.  
45  
46  
47  
48  
49  
50  
51  
52

53 In conclusion, our study suggests a potential role of the ANXA11 SNPs and their  
54  
55 related haplotypes in the genetic susceptibility to sarcoidosis. Further studies are  
56  
57  
58  
59  
60

needed to investigate how these SNPs affect the function of ANXA11.

### **Contributors**

LG Zhang was involved in conception and design of the study, acquisition of patient data, genotyping and drafted the paper. ZJ Xiao and GC Shi were involved in design of the study, genotyping and interpretation of results. J Huang and CX Zhang were involved in [the](#) design of the study, acquisition of patient data and interpretation of result. All authors revised the draft paper.

### **Funding**

The project was supported by the Research and Development Foundation of Science and Technology of Henan Province (2012k15).

### **Competing interests**

None.

### **Patient consent**

Obtained.

### **Ethics approval**

Ethics approval was provided by the First Hospital Affiliated to the Xinxiang Medical College.

### **Provenance and peer review**

Not commissioned; externally peer reviewed.

### **Data sharing statement**

No additional data are available.

### **Figure Legend**

~~Fig. 1 The structure of the human ANXA11 gene and 15 SNPs located on the gene.~~

**Fig. 2-1** The LD plot of the fifteen SNPs in the ANXA11 gene. Values in squares are the pair-wise calculation of  $r^2$  (left) or  $D'$  (right). Black squares indicate  $r^2 = 1$  (i.e. perfect LD between a pair of SNPs). Empty squares indicate  $D' = 1$  (i.e. complete LD between a pair of SNPs).

**Supplemental Fig. 1** ~~Fig. 1 The structure of the human ANXA11 gene and 15 SNPs located on the gene.~~

## Reference

1. Iannuzzi MC, Rybicki BA, Teirstein AS. Sarcoidosis. *N Engl J Med* 2007; 357:2153-65.
2. Baughman RP, Lower EE, du Bois RM. Sarcoidosis. *Lancet* 2003;361:1111-8
3. Grunewald J. Review: role of genetics in susceptibility and outcome of sarcoidosis. *Semin Respir Crit Care Med* 2010;31:380-9.
4. Hofmann S, Franke A, Fischer A, *et al.* Genome-wide association study identifies ANXA11 as a new susceptibility locus for sarcoidosis. *Nat Genet* 2008;40:1103-6.
5. Gerke V, Moss SE. Annexins: from structure to function. *Physiol Rev* 2002;82:331-71.
6. Farnaes L, Ditzel HJ. Dissecting the cellular functions of annexin XI using recombinant human annexin XI-specific autoantibodies cloned by phage display. *J Biol Chem* 2003;278:33120-6.

- 1  
2  
3  
4 7. Tomas A, Futter C, Moss SE. Annexin 11 is required for midbody formation and  
5  
6 completion of the terminal phase of cytokinesis. *J Cell Biol* 2004;165:813-22.  
7  
8  
9 8. Petzmann S, Maercker C, Markert E, *et al.* Enhanced proliferation and decreased  
10  
11 apoptosis in lung lavage cells of sarcoidosis patients. *Sarcoidosis Vasc Diffuse*  
12  
13 *Lung Dis* 2006;23:190-200  
14  
15  
16 9. Dubaniewicz A, Trzonkowski P, Dubaniewicz-Wybieralska M, *et al.* Comparative  
17  
18 analysis of mycobacterial heat shock proteins-induced apoptosis of peripheral  
19  
20 blood mononuclear cells in sarcoidosis and tuberculosis. *J Clin Immunol*  
21  
22 2006;26:243-50.  
23  
24  
25  
26 10. Agostini C, Trentin L, Facco M, *et al.* Role of IL-15, IL-2, and their receptors in  
27  
28 the development of T cell alveolitis in pulmonary sarcoidosis. *J Immunol*  
29  
30 1996;157:910-8  
31  
32  
33  
34 11. Jullien D, Sieling PA, Uyemura K, *et al.* IL-15, an immunomodulator of T cell  
35  
36 responses in intracellular infection. *J Immunol* 1997;158:800-6  
37  
38  
39 12. Muller-Quernheim J, Schurmann M, Hofmann S, *et al.* Genetics of sarcoidosis.  
40  
41 *Clin Chest Med* 2008;29:391-414.  
42  
43  
44 13. Morais A, Lima B, Peixoto M, *et al.* Annexin A11 gene polymorphism (R230C  
45  
46 variant) and sarcoidosis in a Portuguese population. *Tissue antigens*  
47  
48 2013;82:186-91.  
49  
50  
51 14. Li Y, Pabst S, Kubisch C, *et al.* First independent replication study confirms the  
52  
53 strong genetic association of ANXA11 with sarcoidosis. *Thorax*  
54  
55 2010;65:939-40.  
56  
57  
58  
59  
60

- 1  
2  
3  
4 15. Gabriel SB, Schaffner SF, Nguyen H, *et al.* The structure of haplotype blocks in  
5  
6 the human genome. *Science* 2002;296:2225-9.  
7  
8  
9 16. Barrett JC, Fry B, Maller J, *et al.* Haploview: analysis and visualization of LD and  
10  
11 haplotype maps. *Bioinformatics* 2005;21:263-5.  
12  
13  
14 17. Curtis D, Knight J, Sham PC. Program report: GENECOUNTING support  
15  
16 programs. *Ann Hum Genet* 2006;70:277-9.  
17  
18  
19 18. Zhao JH, Curtis D, Sham PC. Model-free analysis and permutation tests for allelic  
20  
21 associations. *Hum Hered* 2000;50:133-9.  
22  
23  
24 19. Zhao JH, Lissarrague S, Essioux L, *et al.* GENECOUNTING: haplotype analysis  
25  
26 with missing genotypes. *Bioinformatics* 2002;18:1694-5  
27  
28  
29 20. Zhao JH, Sham PC. Generic number systems and haplotype analysis. *Comput*  
30  
31 *Methods Programs Biomed* 2003;70:1-9  
32  
33  
34 21. Mrazek F, Stahelova A, Kriegova E, *et al.* Functional variant ANXA11 R230C:  
35  
36 true marker of protection and candidate disease modifier in sarcoidosis. *Genes*  
37  
38 *Immun* 2011;12:490-4.  
39  
40  
41 22. Levin AM, Iannuzzi MC, Montgomery CG, *et al.* Association of ANXA11 genetic  
42  
43 variation with sarcoidosis in African Americans and European Americans.  
44  
45 *Genes Immun* 2013;14:13-8.  
46  
47  
48  
49 24. Tomas A, Moss SE. Calcium- and cell cycle-dependent association of annexin 11  
50  
51 with the nuclear envelope. *J Biol Chem* 2003;278:20210-6.  
52  
53  
54  
55  
56  
57  
58  
59  
60

1  
2  
3  
4  
5  
6  
7  
8  
9  
10  
11  
12  
13  
14  
15  
16  
17  
18  
19  
20  
21  
22  
23  
24  
25  
26  
27  
28  
29  
30  
31  
32  
33  
34  
35  
36  
37  
38  
39  
40  
41  
42  
43  
44  
45  
46  
47  
48  
49  
50  
51  
52  
53  
54  
55  
56  
57  
58  
59  
60

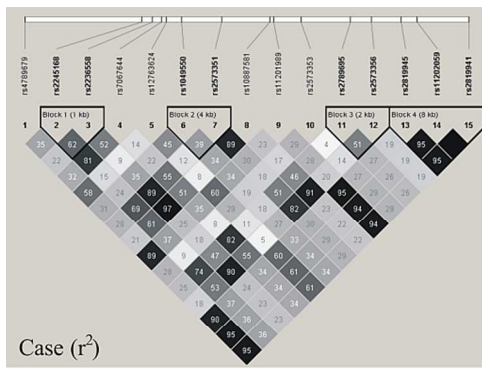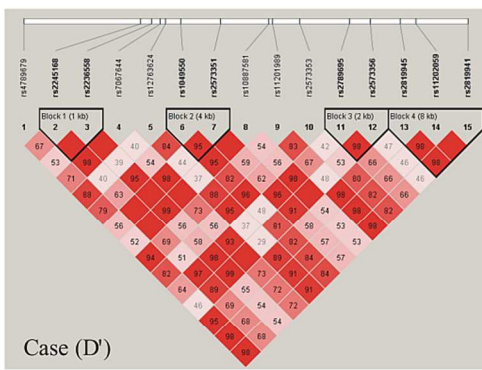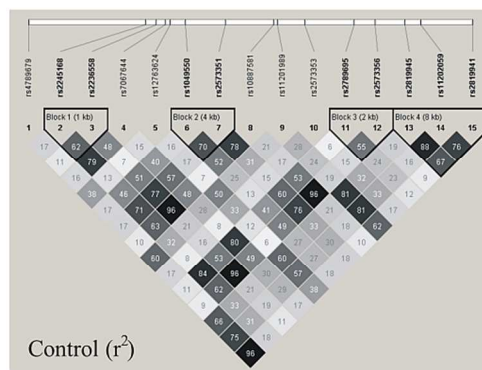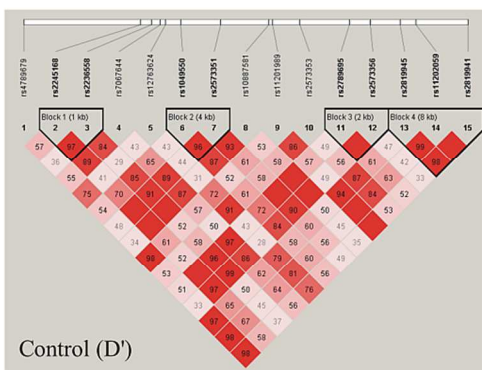

90x66mm (300 x 300 DPI)

Review only



1  
2  
3  
4  
5  
6  
7  
8  
9  
10  
11  
12  
13  
14  
15  
16  
17  
18  
19  
20  
21  
22  
23  
24  
25  
26  
27  
28  
29  
30  
31  
32  
33  
34  
35  
36  
37  
38  
39  
40  
41  
42  
43  
44  
45  
46  
47  
48  
49  
50  
51  
52  
53  
54  
55  
56  
57  
58  
59  
60

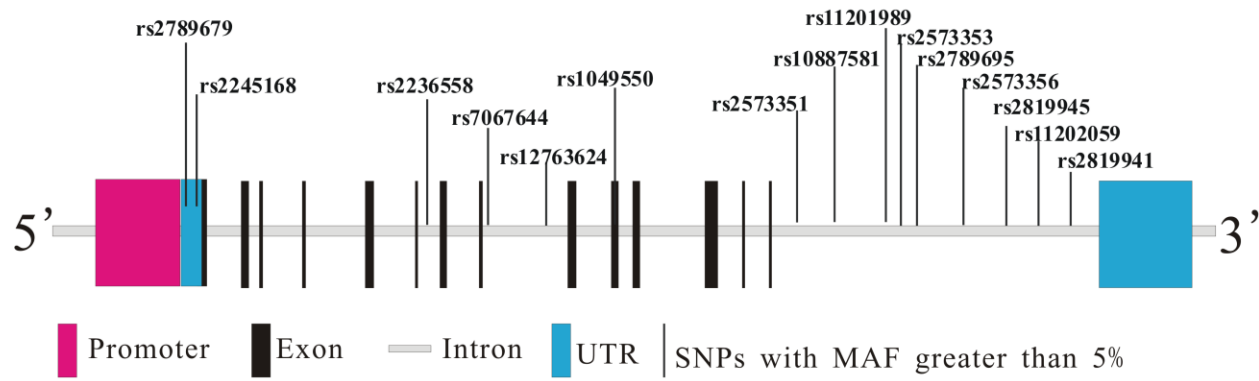

For peer review only

**Supplemental table 1** Summary of all published sarcoidosis-association studies for ANXA11

| Study           | Population   |          | Type of Study | Sample Size (n) |         | Number of SNPs typed | Positive SNPs                   |
|-----------------|--------------|----------|---------------|-----------------|---------|----------------------|---------------------------------|
|                 | Ethnic group | Country  |               | Sarcoidosis     | Control |                      |                                 |
| Hofmann S, 2008 | Caucasian    | Germany  | Case-control  | 499             | 490     | GWAS                 | rs2789679, rs7091565, rs1049550 |
| Mrazek F, 2011  | Caucasian    | Czech    | Case-control  | 245             | 254     | 1                    | rs1049550                       |
| Cozier YC, 2012 | Caucasian    | America  | Case-control  | 486             | 943     | 10p12-10q22          | rs2789679, rs2819941            |
| Li Y, 2013      | Caucasian    | Germany  | Case-control  | 325             | 364     | 1                    | rs1049550                       |
| Levin AM, 2013  | Caucasian    | America  | Case-control  | 1689            | 1252    | 25                   | rs1049550                       |
| Morais A, 2013  | Caucasian    | Portugal | Case-control  | 208             | 197     | 1                    | rs1049550                       |

**Supplemental Table 2** Genotypic and allelic frequencies of ANXA11 polymorphisms in the controls and patients with sarcoidosis

| Variable     | Controls (n=418 ) |      | Sarcoidosis (n=412) |      | P-value <sup>a</sup> | OR, 95% CI      |
|--------------|-------------------|------|---------------------|------|----------------------|-----------------|
|              | No.               | %    | No.                 | %    |                      |                 |
| rs2245168    |                   |      |                     |      | 0.920                |                 |
| CC           | 156               | 37.3 | 150                 | 36.4 | 0.791                | 1.04, 0.74-1.38 |
| CT           | 200               | 47.9 | 197                 | 47.8 | 0.955                | 0.99, 0.76-1.30 |
| TT           | 62                | 14.8 | 65                  | 15.8 | 0.781                | 0.95, 0.65-1.39 |
| Per T allele | 324               | 38.8 | 327                 | 39.7 | 0.698                | 1.04, 0.85-1.27 |
| rs2236558    |                   |      |                     |      | 0.172                |                 |
| GG           | 118               | 28.2 | 104                 | 25.2 | 0.72                 | 1.06, 0.77-1.45 |
| TG           | 190               | 45.5 | 214                 | 51.9 | 0.060                | 0.77, 0.59-1.01 |
| TT           | 110               | 26.3 | 94                  | 22.8 | 0.073                | 1.33, 0.97-1.82 |
| Per T allele | 410               | 49.0 | 402                 | 48.8 | 0.917                | 0.99, 0.82-1.20 |
| rs7067644    |                   |      |                     |      | 0.173                |                 |
| AA           | 152               | 36.4 | 176                 | 42.7 | 0.059                | 0.76, 0.58-1.01 |
| GA           | 206               | 49.3 | 182                 | 44.2 | 0.137                | 1.23, 0.94-1.68 |
| GG           | 60                | 14.4 | 54                  | 13.1 | 0.597                | 1.11, 0.75-1.65 |
| Per G allele | 326               | 38.0 | 290                 | 35.2 | 0.109                | 0.85, 0.70-1.04 |
| rs12763624   |                   |      |                     |      | 0.118                |                 |
| TT           | 126               | 75.6 | 150                 | 36.4 | 0.008                | 0.68, 0.51-0.91 |
| CT           | 216               | 51.7 | 186                 | 45.2 | 0.059                | 1.30, 0.99-1.71 |
| CC           | 76                | 18.2 | 76                  | 18.5 | 0.411                | 1.16, 0.81-1.67 |
| Per C allele | 368               | 44.0 | 338                 | 41.0 | 0.216                | 0.88, 0.73-1.08 |
| rs2573351    |                   |      |                     |      | 0.437                |                 |

|    |              |     |      |     |      |       |                 |
|----|--------------|-----|------|-----|------|-------|-----------------|
| 1  |              |     |      |     |      |       |                 |
| 2  |              |     |      |     |      |       |                 |
| 3  |              |     |      |     |      |       |                 |
| 4  |              |     |      |     |      |       |                 |
| 5  |              |     |      |     |      |       |                 |
| 6  |              |     |      |     |      |       |                 |
| 7  | TT           | 120 | 28.7 | 104 | 25.2 | 0.263 | 1.19, 0.88-1.62 |
| 8  | CT           | 202 | 48.3 | 216 | 52.4 | 0.238 | 0.85, 0.65-1.12 |
| 9  | CC           | 96  | 23.0 | 92  | 22.3 | 0.826 | 1.04, 0.75-1.44 |
| 10 | Per C allele | 394 | 47.1 | 400 | 48.5 | 0.564 | 1.06, 0.87-1.28 |
| 11 | rs10887581   |     |      |     |      | 0.290 |                 |
| 12 | TT           | 114 | 27.3 | 96  | 23.3 | 0.190 | 1.23, 0.90-1.69 |
| 13 | TC           | 190 | 45.5 | 208 | 50.5 | 0.148 | 0.82, 0.62-1.07 |
| 14 | CC           | 114 | 27.3 | 108 | 26.2 | 0.729 | 1.06, 0.78-1.44 |
| 15 | Per C allele | 418 | 50.0 | 424 | 51.5 | 0.583 | 1.06, 0.87-1.29 |
| 16 | rs11201989   |     |      |     |      | 0.144 |                 |
| 17 | GG           | 130 | 31.1 | 128 | 31.1 | 0.995 | 1.00, 0.75-1.34 |
| 18 | GC           | 218 | 52.2 | 194 | 47.1 | 0.141 | 1.23, 0.93-1.62 |
| 19 | CC           | 70  | 16.8 | 90  | 21.9 | 0.060 | 0.71, 0.50-1.01 |
| 20 | Per C allele | 358 | 42.8 | 374 | 45.4 | 0.29  | 1.11, 0.91-1.35 |
| 21 | rs2573353    |     |      |     |      | 0.918 |                 |
| 22 | CC           | 178 | 42.6 | 176 | 42.7 | 0.957 | 0.99, 0.75-1.31 |
| 23 | CA           | 196 | 46.9 | 192 | 46.6 | 0.921 | 1.01, 0.77-1.33 |
| 24 | AA           | 44  | 10.5 | 44  | 10.7 | 0.941 | 0.98, 0.63-1.53 |
| 25 | Per A allele | 284 | 34.0 | 280 | 34.0 | 0.997 | 1.00, 0.82-1.23 |
| 26 | rs2789695    |     |      |     |      | 0.918 |                 |
| 27 | TT           | 178 | 42.6 | 180 | 34.0 | 0.740 | 0.95, 0.73-1.26 |
| 28 | CT           | 188 | 45.0 | 184 | 44.7 | 0.920 | 1.01, 0.77-1.33 |
| 29 | CC           | 52  | 12.4 | 48  | 11.7 | 0.73  | 1.08, 0.71-1.64 |
| 30 | Per C allele | 292 | 34.9 | 280 | 34.0 | 0.69  | 0.96, 0.78-1.17 |
| 31 | rs2573356    |     |      |     |      | 0.892 |                 |
| 32 | CC           | 118 | 28.2 | 112 | 27.2 | 0.742 | 1.05, 0.78-1.43 |
| 33 |              |     |      |     |      |       |                 |
| 34 |              |     |      |     |      |       |                 |
| 35 |              |     |      |     |      |       |                 |
| 36 |              |     |      |     |      |       |                 |
| 37 |              |     |      |     |      |       |                 |
| 38 |              |     |      |     |      |       |                 |
| 39 |              |     |      |     |      |       |                 |
| 40 |              |     |      |     |      |       |                 |
| 41 |              |     |      |     |      |       |                 |
| 42 |              |     |      |     |      |       |                 |
| 43 |              |     |      |     |      |       |                 |
| 44 |              |     |      |     |      |       |                 |
| 45 |              |     |      |     |      |       |                 |
| 46 |              |     |      |     |      |       |                 |
| 47 |              |     |      |     |      |       |                 |
| 48 |              |     |      |     |      |       |                 |
| 49 |              |     |      |     |      |       |                 |

1  
2  
3  
4  
5  
6  
7  
8  
9  
10  
11  
12  
13  
14  
15  
16  
17  
18  
19  
20  
21  
22  
23  
24  
25  
26  
27  
28  
29  
30  
31  
32  
33  
34  
35  
36  
37  
38  
39  
40  
41  
42  
43  
44  
45  
46  
47  
48  
49

|              |     |      |     |      |       |                 |
|--------------|-----|------|-----|------|-------|-----------------|
| CT           | 190 | 45.5 | 194 | 47.1 | 0.639 | 0.94, 0.71-1.23 |
| TT           | 110 | 26.3 | 106 | 25.7 | 0.843 | 1.03, 0.76-1.41 |
| Per T allele | 410 | 49.0 | 406 | 49.3 | 0.926 | 0.99, 0.82-1.20 |
| rs2819945    |     |      |     |      | 0.101 |                 |
| GG           | 119 | 28.5 | 130 | 31.6 | 0.294 | 0.85, 0.63-1.15 |
| GA           | 221 | 52.9 | 188 | 45.6 | 0.030 | 1.35, 1.03-1.78 |
| AA           | 78  | 18.7 | 94  | 22.8 | 0.138 | 0.78, 0.55-1.09 |
| Per A allele | 377 | 45.1 | 376 | 45.6 | 0.827 | 1.02, 0.84-1.24 |
| rs11202059   |     |      |     |      | 0.064 |                 |
| GG           | 106 | 25.4 | 128 | 31.1 | 0.067 | 0.75, 0.56-1.02 |
| GA           | 226 | 54.1 | 190 | 46.1 | 0.021 | 1.38, 1.05-1.81 |
| AA           | 86  | 20.6 | 94  | 22.8 | 0.429 | 0.88, 0.63-1.22 |
| Per A allele | 398 | 47.6 | 378 | 45.9 | 0.479 | 0.93, 0.77-1.13 |

<sup>a</sup> P-value was calculated by 2×3 and 2×2 chi-squared tests based on codominant, dominant for the rare allele, heterosis and recessive for the rare allele models of inheritance.

Alpha value is adjusted by Bonferroni correction and statistically significant results (P<0.003)

**Supplemental table 3** Comparison of logistic regression models with and without  
Genotypes for  
rs2789679 and rs1049550

| Model                          | Log Likelihood | Df | <i>P</i> value |
|--------------------------------|----------------|----|----------------|
| Constant + rs2789679           | 575.3          | 1  | < 0.001        |
| Constants+ rs2789679+rs1049550 | 565.8          | 2  | 0.001          |

# BMJ Open

## Annexin A11 (ANXA11) gene polymorphisms are associated with sarcoidosis in a Han Chinese population - a case-control study

|                                 |                                                                                                                                                                                                                                                                                                                                                                                                                                                                                                                                                                                    |
|---------------------------------|------------------------------------------------------------------------------------------------------------------------------------------------------------------------------------------------------------------------------------------------------------------------------------------------------------------------------------------------------------------------------------------------------------------------------------------------------------------------------------------------------------------------------------------------------------------------------------|
| Journal:                        | <i>BMJ Open</i>                                                                                                                                                                                                                                                                                                                                                                                                                                                                                                                                                                    |
| Manuscript ID:                  | bmjopen-2013-004466.R3                                                                                                                                                                                                                                                                                                                                                                                                                                                                                                                                                             |
| Article Type:                   | Research                                                                                                                                                                                                                                                                                                                                                                                                                                                                                                                                                                           |
| Date Submitted by the Author:   | 13-May-2014                                                                                                                                                                                                                                                                                                                                                                                                                                                                                                                                                                        |
| Complete List of Authors:       | Zhang, LG; the First Hospital Affiliated to the Xinxiang Medical College, The Third Department of Tuberculosis<br>Xiao, ZJ; the First Hospital Affiliated to the Xinxiang Medical College, The Third Department of Tuberculosis<br>Shi, GC; the First Hospital Affiliated to the Xinxiang Medical College, The Third Department of Tuberculosis<br>J, Huang; the First Hospital Affiliated to the Xinxiang Medical College, The Third Department of Tuberculosis<br>Zhang, CX; the First Hospital Affiliated to the Xinxiang Medical College, The Third Department of Tuberculosis |
| <b>Primary Subject Heading</b>: | Infectious diseases                                                                                                                                                                                                                                                                                                                                                                                                                                                                                                                                                                |
| Secondary Subject Heading:      | Genetics and genomics                                                                                                                                                                                                                                                                                                                                                                                                                                                                                                                                                              |
| Keywords:                       | GENETICS, IMMUNOLOGY, INFECTIOUS DISEASES                                                                                                                                                                                                                                                                                                                                                                                                                                                                                                                                          |
|                                 |                                                                                                                                                                                                                                                                                                                                                                                                                                                                                                                                                                                    |

SCHOLARONE™  
Manuscripts

only

1  
2  
3  
4 1 **Annexin A11 (ANXA11) gene polymorphisms are associated with sarcoidosis in a**

5  
6 2 **Han Chinese population - a case-control study**

7  
8  
9 3 LG Zhang, ZJ Xiao\*, GC Shi, J Huang, CX Zhang

10  
11 4 The Third Department of Tuberculosis, the First Hospital Affiliated to the Xinxiang

12  
13  
14 5 Medical College, Xinxiang, Henan, PR China

15  
16 6 \*Corresponding author: Zhijian Xiao, The Third Department of Tuberculosis, the First

17  
18  
19 7 Hospital Affiliated to the Xinxiang Medical College, Xinxiang, Henan, PR China.

20  
21 8 No.88 Jiankang Road, Weihui City, Henan, 463000, PR China

22  
23  
24 9 E-mail: zhangligongys@163.com

25  
26 10 Tel: +86 0373 - 4402229 (office)

27  
28  
29 11 Fax: +86 0373 -4402251

30  
31 12 **Key words:** Sarcoidosis; Annexin A11; Single-nucleotide polymorphism

32  
33  
34 13 Word count: 3918

35  
36  
37  
38  
39  
40  
41  
42  
43  
44  
45  
46  
47  
48  
49  
50  
51  
52  
53  
54  
55  
56  
57  
58  
59  
60 14



1  
2  
3  
4 **Abstract**

5  
6 **Objectives:** To further identify the single-nucleotide polymorphisms (SNPs) that  
7  
8  
9  
10  
11  
12  
13  
14  
15  
16  
17  
18  
19  
20  
21  
22  
23  
24  
25  
26  
27  
28  
29  
30  
31  
32  
33  
34  
35  
36  
37  
38  
39  
40  
41  
42  
43  
44  
45  
46  
47  
48  
49  
50  
51  
52  
53  
54  
55  
56  
57  
58  
59  
60  
3 contribute to the genetic susceptibility to sarcoidosis, we examined the potential  
4 association between sarcoidosis and fifteen SNPs of the ANXA11 gene.

5 **Design:** A case - control study.

6 **Setting:** A tuberculosis unit in a hospital of the university in China.

7 **Participants:** Participants included 412 patients with sarcoidosis and 418 healthy  
8  
9  
10  
11  
12  
13  
14  
15  
16  
17  
18  
19  
20  
21  
22  
23  
24  
25  
26  
27  
28  
29  
30  
31  
32  
33  
34  
35  
36  
37  
38  
39  
40  
41  
42  
43  
44  
45  
46  
47  
48  
49  
50  
51  
52  
53  
54  
55  
56  
57  
58  
59  
60  
controls.

9 **Methods:** The selected SNPs were genotyped using the MALDI-TOF in the  
10  
11  
12  
13  
14  
15  
16  
17  
18  
19  
20  
21  
22  
23  
24  
25  
26  
27  
28  
29  
30  
31  
32  
33  
34  
35  
36  
37  
38  
39  
40  
41  
42  
43  
44  
45  
46  
47  
48  
49  
50  
51  
52  
53  
54  
55  
56  
57  
58  
59  
60  
MassARRAY system. Probes and primers were designed using the Assay Design  
Software (Sequenom, San Diego, CA, USA).

12 **Results:** The statistical significant differences were found in the allelic or genotypic  
13  
14  
15  
16  
17  
18  
19  
20  
21  
22  
23  
24  
25  
26  
27  
28  
29  
30  
31  
32  
33  
34  
35  
36  
37  
38  
39  
40  
41  
42  
43  
44  
45  
46  
47  
48  
49  
50  
51  
52  
53  
54  
55  
56  
57  
58  
59  
60  
frequencies of the rs2789679, rs1049550 and rs2819941 in the ANXA11 gene  
between the patients with sarcoidosis and the controls. The rs2789679 A allele ( $P =$   
0.00004, OR = 1.42, 95%CI = 1.17-1.73) and rs2819941 T allele ( $P = 0.0006$ , OR =  
1.41, 95%CI = 1.16-1.71) were significantly more frequent in the patients with  
sarcoidosis compared to controls. The frequency of the rs1049550 T allele ( $P =$   
0.000002, OR = 0.61, 95%CI= 0.49 - 0.74) in the patients with sarcoidosis was  
significantly lower than that in the controls. The strong linkage disequilibrium (LD)  
was observed in four blocks ( $D' > 0.9$ ). In block 2 (rs1049550-rs2573351), the T - C  
haplotype occurred significantly less frequently ( $P = 0.001$ ), whereas the C - C  
haplotypes occurred more frequently ( $P = 0.0001$ ) in the patients with sarcoidosis

1  
2  
3  
4 1 than the controls. Furthermore, genotype frequency distribution revealed that, in  
5  
6 2 rs1049550, CC genotype was significantly more in the patients with chest  
7  
8 3 radiographic (CXR) stage I sarcoidosis than the patients with CXR stage II-IV  
9  
10 4 sarcoidosis ( $P = 0.012$ ).

11  
12  
13 5 **Conclusions:** These findings point to a role for the polymorphisms of ANXA11 in  
14  
15 6 sarcoidosis in a Chinese Han population, and may be informative for future genetic  
16  
17 7 studies on sarcoidosis.  
18  
19  
20  
21  
22  
23  
24  
25  
26  
27  
28  
29  
30  
31  
32  
33  
34  
35  
36  
37  
38  
39  
40  
41  
42  
43  
44  
45  
46  
47  
48  
49  
50  
51  
52  
53  
54  
55  
56  
57  
58  
59  
60

1  
2  
3  
4 **1 Article summary**

5  
6 **2 Article focus**

7  
8  
9 3 1. The first genome-wide association study (GWAS) in sarcoidosis conducted in a  
10  
11 4 German population has revealed that the rs1049550 (C > T, Arg230Cys) located in  
12  
13 5 exon 10 were associated with sarcoidosis.

14  
15  
16 6 2. Whether these SNPs modulate the risk of sarcoidosis by themselves or whether  
17  
18 7 they correlate with other causative SNPs and are repeated in other populations remain  
19  
20 8 unclear.

21  
22 9 3. We hypothesize that common variants in the ANXA11 gene may significantly  
23  
24 10 contribute to the predisposition to develop sarcoidosis in a Chinese Han population.

25  
26  
27  
28  
29 **11 Key messages**

30  
31 12 1. ANXA11 rs2789679 (3'-UTR) was significantly associated with sarcoidosis.

32  
33 13 2. ANXA11 rs1049550 (exon 10) was significantly associated with sarcoidosis.

34  
35 14 3. Another significant association was observed for rs2819941 (intron 14).

36  
37  
38  
39 **15 Strengths and limitations of this study**

40  
41 16 1. A systematical screening of the functional SNPs in the promoter region, 5'- and  
42  
43 17 3'-UTR, exons of the ANXA11 gene, and the homogeneity of the study subjects  
44  
45 18 representing the Chinese Han are the main strengths of this study. Chinese Han

46  
47  
48 19 2. The lack of data proving the positive association observed for rs2789679 and  
49  
50 20 rs1049550 is a potential limitation of this study. Furthermore, the association of the  
51  
52 21 serum level of ANXA11 with sarcoidosis still needs to be investigated.

53  
54  
55  
56  
57  
58  
59  
60 22

## 1 INTRODUCTION

2 Sarcoidosis is a systemic autoimmune disease characterized by destructive,  
3 non-caseating epithelioid granulomatous lesions, with accumulated phagocytes and  
4 activated CD4<sup>+</sup> T helper type 1 lymphocytes<sup>1 2</sup>. The typical manifestations of  
5 sarcoidosis include bilateral hilar lymphadenopathy, pulmonary infiltration and ocular  
6 and skin lesions. The clinical course and prognosis of sarcoidosis are variable. The  
7 acute forms of sarcoidosis such as Löfgren's syndrome (LS) can resolve  
8 spontaneously in most cases. However, chronic pulmonary sarcoidosis may progress  
9 to lung fibrosis which eventually causes respiratory failure. Recent studies have  
10 demonstrated that sarcoidosis can occur in a pattern of family clustering, and its racial  
11 incidence is also different, suggesting that some genetic factors may contribute to the  
12 risk and severity of sarcoidosis<sup>1 3</sup>.

13 The Annexin gene family is involved in the etiology of several autoimmune and  
14 chronic diseases<sup>4 5</sup>. One member of the Annexin gene family, ANXA11, located on  
15 chromosome 10q22.3, is involved in calcium signaling, apoptosis, vesicle trafficking,  
16 cell growth and terminal phase of cell division<sup>5-7</sup>. In this context, the development  
17 and maintenance of the granulomatous inflammation in sarcoidosis have been  
18 repeatedly associated with the impaired apoptosis of activated inflammatory cells<sup>8 9</sup>.  
19 Most of the early-stage sarcoidosis is characterized by mononuclear cell alveolitis  
20 dominated by activated CD4<sup>+</sup> T cells and macrophages. Between these cells, the  
21 uncoordinated interplay results in the formation of typical non-caseating granulomas.  
22 The mechanism by which the granulomas resolve has not been fully elucidated.

1  
2  
3  
4 1 However, it is generally assumed that the induction of apoptosis and/or by the  
5  
6 2 withdrawal of inflammatory cytokines participates in the disappearance of  
7  
8 3 granulomas<sup>10 11</sup>. In the patients with sarcoidosis, their peripheral blood monocytes  
9  
10 4 were characterized by apoptosis<sup>9</sup>.

11  
12  
13  
14 5 In previous studies, case - control/family ‘hypothesis - driven’ studies and low  
15  
16 6 density linkage scans were used to identify genetic factors conferring the genetic  
17  
18 7 susceptibility to sarcoidosis<sup>12</sup>. Notably, the first genome - wide association study  
19  
20 8 (GWAS) in sarcoidosis conducted in a German population has recently revealed an  
21  
22 9 association: the leading rs2789679 SNP (single - nucleotide polymorphism) located in  
23  
24 10 the 3’-untranslated region (3’-UTR) and a common nonsynonymous SNP (rs1049550,  
25  
26 11 C > T, Arg230Cys) were associated with the increased risk of sarcoidosis<sup>4 13</sup>. This  
27  
28 12 association has recently been supported by another report from the same population<sup>14</sup>.  
29  
30 13 Thus, more studies should be performed to demonstrate the following items: whether  
31  
32 14 these SNPs modulate the risk of sarcoidosis by themselves or whether they correlate  
33  
34 15 with other causative SNPs and are repeated in other populations. The published  
35  
36 16 studies about the association of sarcoidosis and ANXA11 are summarized in  
37  
38 17 Supplemental table 1. We hypothesize that common variants in the ANXA11 gene  
39  
40 18 may significantly contribute to the predisposition to develop sarcoidosis.  
41  
42  
43  
44  
45  
46  
47  
48

49 19 In this study, we investigated fifteen loci in a Chinese population from He’nan  
50  
51 20 province (China) to verify the putative association between ANXA11 polymorphisms  
52  
53 21 and sarcoidosis.  
54  
55

## 56 22 **SUBJECTS AND METHODS**

## 1     **Subjects**

2           Four hundred and twelve patients with sarcoidosis (mean  $\pm$  SD age:  $53.6 \pm 4.6$   
3 years; 155 men and 257 women) were recruited from our hospital between May 2005  
4 and March 2013. Sarcoidosis was diagnosed by the evidence of non-caseating  
5 epitheloid cell granuloma in biopsy specimens and chest radiographic abnormalities.  
6 Chronic sarcoidosis was defined as a disease over at least 2 years or at least two  
7 episodes in a lifetime. A cute sarcoidosis was defined as one episode of acute  
8 sarcoidosis which had totally resolved at the date of the examination. The control  
9 group consisted of 418 unrelated healthy subjects (mean  $\pm$  SD age:  $54.2 \pm 5.3$  years;  
10 160 men and 258 women) who underwent health examinations in the Medical  
11 Examination Center of the First Affiliated Hospital of the Xinxiang Medical College  
12 (Xinxiang, China) between Oct 2009 and Sept 2013. None of the individuals in the  
13 control group had a history of lung diseases or showed any symptoms of the lung or  
14 other diseases by chest radiography or laboratory blood tests. Participants were  
15 excluded if they: were taking other prescribed medications that could affect the  
16 central nervous system; had a history of seizures, hematological diseases, or severe  
17 liver or kidney impairment; or were pregnant. No familial relationship was known  
18 between the study participants. The study was performed according to the Guidelines  
19 of the Medical Ethical Committee of Xinxiang Medical College (Xinxiang, China).  
20 Written informed consent was obtained from each participant in this study.

## 21    **SNP selection**

1 Tagging SNPs were selected from the catalogs of the International HapMap  
2 Project. The rs2789679 and rs2245168 are located in 5'-UTR, rs2236558 in intron 6,  
3 rs7067644 and rs12763624 in intron 8, rs1049550 in exon 10, rs2573351 in intron 13,  
4 rs10887581, rs11201989, rs2573353, rs2789695, rs2573356, rs2819945, rs11202059  
5 and rs2819941 in intron 14 (Supplemental figure 1). Marker selection was based on  
6 the following criteria. (a) We used the CHB data from the HapMap (release 27) to  
7 select tagSNPs for ANXA11. (b) We restricted our search for tagSNPs from base pair  
8 80155124 to 80205677. (c) Further, we limited the SNPs to tag to those with a minor  
9 allele frequency  $\geq 0.2$  in the CHB. (d) Based on these restrictions, there were a total  
10 of 29 SNPs. (e) Using HAPLOVIEW with an  $r^2$  threshold  $\geq 0.8$ , 15 tagSNP were  
11 selected and used for subsequent analyses.

## 12 Genotyping

13 Peripheral blood was collected from a vein into a sterile tube coated with  
14 ethylenediamine tetraacetic acid (EDTA). Plasma samples were stored at  $-20^{\circ}\text{C}$ .  
15 Genomic DNA was extracted from the frozen peripheral blood samples using a  
16 QIAmp Blood Mini Kit (Qiagen Inc., Valencia, CA, USA) according to the  
17 manufacturer's protocols. The selected SNPs were genotyped in cases and controls by  
18 using the MALDI-TOF in the MassARRAY system (Sequenom Inc., San Diego, CA,  
19 USA). Probes and primers were designed using the Assay Design Software  
20 (Sequenom, San Diego, CA, USA). The completed genotyping reactions were spotted  
21 onto a 384 well spectroCHIP (Sequenom) using the MassARRAY Nanodispenser  
22 (Sequenom) and determined by the matrix - assisted laser desorption ionization time -

1 of - flight mass spectrometer. Genotype calling was performed in realtime with the  
2  
3  
4  
5  
6  
7  
8  
9  
10  
11  
12  
13  
14  
15  
16  
17  
18  
19  
20  
21  
22  
23  
24  
25  
26  
27  
28  
29  
30  
31  
32  
33  
34  
35  
36  
37  
38  
39  
40  
41  
42  
43  
44  
45  
46  
47  
48  
49  
50  
51  
52  
53  
54  
55  
56  
57  
58  
59  
60

1 of - flight mass spectrometer. Genotype calling was performed in realtime with the  
2  
3  
4  
5  
6  
7  
8  
9  
10  
11  
12  
13  
14  
15  
16  
17  
18  
19  
20  
21  
22  
23  
24  
25  
26  
27  
28  
29  
30  
31  
32  
33  
34  
35  
36  
37  
38  
39  
40  
41  
42  
43  
44  
45  
46  
47  
48  
49  
50  
51  
52  
53  
54  
55  
56  
57  
58  
59  
60

#### 4 **Statistical analysis**

5 All data were analyzed using the SPSS 17.0 software (SPSS Inc., Chicago, IL,  
6 USA). Hardy-Weinberg equilibrium was evaluated by Chi-square tests. Differences  
7 between the cases and controls in the frequency of the alleles, genotypes and  
8 haplotypes were evaluated by the Fisher's exact test or the Pearson Chi-square test.  
9 Unconditional logistic regression was used to calculate the odds ratio (OR) and 95%  
10 confidence interval (CI) in independent association between each locus and the  
11 presence of sarcoidosis. Gender and age of subjects were treated as covariants in  
12 binary logistic regression. *P* values were calculated based on codominant, dominant  
13 for the rare allele, heterosis and recessive for the rare allele models of inheritance.  
14 Models of multiple logistic regression were used to test the independence of  
15 individual allelic effect. In detail, the most significant SNP was chosen to be the  
16 conditional SNP (covariate in the regression model) when testing other significant  
17 SNPs; Meanwhile, a multi-SNP model including all significant SNPs was also  
18 performed. The Bonferroni correction was used to adjust the test level when multiple  
19 comparisons were conducted, and the *P* value was divided by the total number of loci.  
20 Haplotype blocks were defined according to the criteria developed by Gabriel et al.<sup>15</sup>.  
21 Pair-wise LD statistics ( $D'$  and  $r^2$ ) and haplotype frequency were calculated, and  
22 haplotype blocks were constructed using the Haploview 4.0<sup>16</sup>. To ensure that the LD



1 blocks most closely reflect the population level LD patterns, definition of the blocks  
2 were based on the control samples alone. The haplotype frequencies were estimated  
3 using GENECOUNTING, which computes maximum - likelihood estimates of  
4 haplotype frequencies from unknown phase data by utilizing an expectation -  
5 maximization algorithm<sup>17-20</sup>. The significance of any haplotypic association was  
6 evaluated using a likelihood ratio test, followed by permutation testing that compared  
7 estimated haplotype frequencies in cases and controls<sup>17 19</sup>.

## 8 RESULTS

9 The genotype distribution of the fifteen polymorphisms was consistent with the  
10 Hardy-Weinberg equilibrium ( $P > 0.05$ ). The analysis of strong LD in the patients  
11 with sarcoidosis and healthy controls revealed that 2 SNPs (rs2245168, rs2236558), 2  
12 SNPs (rs1049550, rs2573351), 2 SNPs (rs2789695, rs2573356) and 3 SNPs  
13 (rs2819945, rs11202059, rs2819941) were located in haplotype block 1, block 2,  
14 block 3 and block 4 ( $D' > 0.9$ , Fig. 1). The genotype distribution, allelic frequencies,  
15 and haplotypes in the patients with sarcoidosis and healthy controls are showed in  
16 Tables 1-3 and Supplemental table 2

17 Comparison of genotype and allele frequency distribution revealed significant  
18 differences between the patients with sarcoidosis and healthy controls for 3 SNPs:  
19 rs2789679, rs1049550 and rs2819941. The rs2789679 A allele ( $P = 0.00004$ , OR =  
20 1.42, 95%CI = 1.17-1.73) and rs2819941 T allele ( $P = 0.0006$ , OR = 1.41, 95%CI =  
21 1.16-1.71) were significantly more frequent in the patients with sarcoidosis compared  
22 to controls. The frequency of the rs1049550 T allele ( $P = 0.000002$ , OR = 0.61,

1  
2  
3  
4 1 95%CI= 0.49-0.74) in the patients with sarcoidosis was significantly lower than that  
5  
6 2 in the controls. These differences remained statistically significant after Bonferroni  
7  
8 3 corrections.  
9

10  
11 4 The multi-SNP model showed only rs1049550 present a significant effect on the  
12  
13 5 disease phenotype ( $p < 0.001$ ). No independent effect was found for rs2789679 or  
14  
15 6 rs2819941 when adjusting for the effect of rs1049550. Both individual SNP and multi -  
16  
17 7 SNP analysis supported rs1049550: T allele was an important protective factor for  
18  
19 8 affecting sarcoidosis (odds ratio around 0.6). In another word, carriers of rs1049550:  
20  
21 9 C allele have higher susceptibility to sarcoidosis in our Chinese Han population  
22  
23 10 (Supplemental table 3).  
24  
25  
26  
27

28  
29 11 We performed an association analysis to determine whether the haplotype was  
30  
31 12 associated with the risk of sarcoidosis (Global  $P < 0.05$  in block 2 and block 3).  
32  
33 13 Compared with the controls, the T - C haplotype occurred significantly less frequently  
34  
35 14 ( $P = 0.001$ ) but the C - C haplotypes occurred more frequently ( $P = 0.0001$ ) in block 2  
36  
37 15 (rs1049550 - rs2573351) in the patients with sarcoidosis.  
38  
39  
40

41  
42 16 To assess particular disease phenotypes, the patients with sarcoidosis were  
43  
44 17 divided into the subgroups according to their chest radiographic (CXR) stage. CXR  
45  
46 18 stage I (isolated bilateral hilar lymphadenopathy):  $N = 196$ ; CXR stages II - IV  
47  
48 19 (infiltration of parenchyma): 167; CXR stage 0 (absence on pulmonary disease):  $N =$   
49  
50 20 28; the information on CXR stage was not available for 21 patients. Genotype  
51  
52 21 frequency distribution revealed that, in rs1049550, CC genotype was significantly  
53  
54 22 more in the patients with chest radiographic (CXR) stage I sarcoidosis than the  
55  
56  
57  
58  
59  
60

1 patients with CXR stage II-IV sarcoidosis ( $P = 0.012$ ). (Table 4).

## 2 **DISCUSSION**

3 A key step in linkage and association studies is to identify common risk variants  
4 in different populations. To determine if common risk variants exist in distinct  
5 populations, fifteen SNPs which span approximately 0.53 Mb of the ANXA11 gene,  
6 were genotyped in samples from the patients with sarcoidosis and healthy controls in  
7 a Chinese Han population. Recently, new sarcoidosis loci have been identified by  
8 genome-wide association studies<sup>4 14</sup>. With the fast development of genome - wide  
9 association studies, an increasing number of susceptibility loci for sarcoidosis have  
10 been found in different populations<sup>4 14 21</sup>. However, these observations should be  
11 confirmed in other genetically independent populations. In this study, we conducted  
12 the first large genetic association study of the ANXA11 gene in a Chinese Han  
13 population. The evidence of markers associated with sarcoidosis was presented, and  
14 these markers were mapped to different locations in the ANXA11 gene (81897864 -  
15 81951001). The association signals in the region were identified, and some  
16 significantly associated haplotypes also appeared this region.

17 Hoffman et al. reported an association between the T allele of the non -  
18 synonymous SNP rs1049550 and significantly decreased risk of sarcoidosis in a  
19 German population<sup>4</sup>. Similar results were also obtained in other two European  
20 populations<sup>14 21</sup>. As a part of the sarcoidosis GWAS done in Americans<sup>22</sup>, we further  
21 confirmed this association in a Chinese Han population. In this study, the frequency of  
22 ANXA11 rs1049550 T allele was significantly lower in the patients with sarcoidosis

1  
2  
3  
4 1 than the healthy controls. Genotype frequency distribution revealed that, in rs1049550,  
5  
6 2 CC genotype was significantly more in the patients with stage I sarcoidosis than the  
7  
8 3 patients with stage II-IV sarcoidosis. The “protective” effect of ANXA11 T allele  
9  
10 4 increased with the number of its copies in the genotype, which is consistent with the  
11  
12 5 result obtained in the patients with sarcoidosis in a German population <sup>4</sup>, Furthermore,  
13  
14 6 the T allele carriers among the patients were protected from infiltration of lung  
15  
16 7 parenchyma (radiographic stages II-IV) <sup>21</sup>. We have also demonstrated that rs1049550  
17  
18 8 is significant cross - ethnically at the gene level after adjustment for the single SNP  
19  
20 9 association tests performed. The mechanism by which rs1049550 affects the  
21  
22 10 susceptibility to sarcoidosis is that the SNP may affect the function of the ANXA11  
23  
24 11 protein rather than affect its expression. In humans, the ANXA11 protein consists of  
25  
26 12 an N - terminalproline - tyrosine - glycine (PYG) - rich region, followed by four  
27  
28 13 annexin core domains. The rs1049550 leads to an amino - acid exchange (basic  
29  
30 14 arginine to a polar cysteine) at the evolutionarily conserved position 230 (R230C) in  
31  
32 15 the first annexin domain, which is responsible for Ca<sup>2+</sup> - dependent trafficking of the  
33  
34 16 protein in the cell <sup>23</sup>.

35  
36  
37  
38  
39  
40  
41  
42  
43 17 In the GWAS conducted by Hofmann et al <sup>4</sup>, the strongest association signal was  
44  
45 18 observed for rs2789679. This marker is located in the 3'-UTR of the ANXA11 gene.  
46  
47 19 The T allele had a frequency of 35% among the patients with sarcoidosis and 44% in  
48  
49 20 the healthy controls, with 13% of the patients with sarcoidosis and 19% of controls  
50  
51 21 being TT homozygous. Fine-mapping in the Black Women's Health Study (BWHS)  
52  
53 22 revealed rs2819941 to be the top SNP, associated with a non-significant ( $P = 0.06$ )  
54  
55  
56  
57  
58  
59  
60

1 reduction in the risk of sarcoidosis (17% reduction per copy of the C-allele). In this  
2 case-control association study, the frequency of the A allele in rs2789679 and the  
3 rs2819941 T allele frequency in the patients with sarcoidosis was significantly higher  
4 than that in the healthy controls. Several lines of evidence suggest that the observed  
5 association is unlikely to be an artifact. First, both the single-SNP and the  
6 haplotype-based association analyses support the current finding. Second, our samples  
7 were from the same geographical region, excluding the. Finally, consistent results  
8 were obtained from two genetically independent populations (Chinese Han and  
9 Europeans). Collectively, our results confirmed the strong association between  
10 ANXA11 polymorphisms and sarcoidosis, suggesting that ANXA11 represents a  
11 strong genetic risk factor for sarcoidosis. Since causal SNP in ANXA11 was not  
12 known, all the SNPs significantly associated with sarcoidosis were actually indirect  
13 association through the real causal one. Though rs2789679 and rs2819941 were not in  
14 LD with rs1049550, it may not tag the causal SNP as well as rs1049550. Hence, their  
15 individual effects were eliminated when controlling for the effect of rs1049550.

16 We further investigated the interaction among polymorphisms and observed  
17 strong LD. The haplotype analysis revealed that significantly more C - C (block 2,  
18 rs1049550 - rs2573351) and significantly fewer T - C haplotypes (block 2) were  
19 found in the patients with sarcoidosis. These results indicated that the patients with C  
20 - C (block 2) haplotypes of the ANXA11 gene were more prone to sarcoidosis.  
21 Significantly higher frequencies of T - C haplotypes were detected in the healthy  
22 controls than in the patients with sarcoidosis, suggesting that they may show

1  
2  
3  
4 1 protective effects against sarcoidosis. Our sample size can detect SNP and haplotype  
5  
6 2 associations with 90% and 85% power, respectively, at a false positive rate of 5%,  
7  
8  
9 3 disease prevalence of 1%, disease allele / haplotype frequency of 0.05 / 0.03, and a  
10  
11 4 presumed odds ratio (OR) of 1.5. To some extent, this finding further supports a role  
12  
13  
14 5 of ANXA11 polymorphisms in sarcoidosis, while ethnic group difference may exist.

16 In conclusion, our study suggests a potential role of the ANXA11 SNPs and their  
17  
18  
19 7 related haplotypes in the genetic susceptibility to sarcoidosis. Further studies are  
20  
21 8 needed to investigate how these SNPs affect the function of ANXA11.  
22  
23  
24  
25  
26  
27  
28  
29  
30  
31  
32  
33  
34  
35  
36  
37  
38  
39  
40  
41  
42  
43  
44  
45  
46  
47  
48  
49  
50  
51  
52  
53  
54  
55  
56  
57  
58  
59  
60

1  
2  
3  
4 **Funding**

5  
6 The project was supported by the Research and Development Foundation of  
7  
8  
9 Science and Technology of Henan Province (2012k15).

10  
11 **Contributors**

12  
13 LG Zhang was involved in conception and design of the study, acquisition of  
14  
15 patient data, genotyping and drafted the paper. ZJ Xiao and GC Shi were involved in  
16  
17 design of the study, genotyping and interpretation of results. J Huang and CX Zhang  
18  
19 were involved in the design of the study, acquisition of patient data and interpretation  
20  
21 of result. All authors revised the draft paper.  
22  
23  
24  
25

26 **Competing interests**

27  
28  
29 None.

30  
31 **Data sharing statement**

32  
33 No additional data are available.  
34  
35

36 **Patient consent**

37  
38  
39 Obtained.  
40

41 **Ethics approval**

42  
43  
44 Ethics approval was provided by the First Hospital Affiliated to the Xinxiang  
45  
46 Medical College.  
47  
48

49 **Provenance and peer review**

50  
51 Not commissioned; externally peer reviewed.  
52  
53  
54  
55  
56  
57  
58  
59  
60

1  
2  
3  
4 **Figure Legends**  
5

6 **Fig. 1** The LD plot of the fifteen SNPs in the ANXA11 gene. Values in squares are the  
7  
8 pair-wise calculation of  $r^2$  (left) or  $D'$  (right). Black squares indicate  $r^2 = 1$  (i.e. perfect  
9  
10 LD between a pair of SNPs). Empty squares indicate  $D' = 1$  (i.e. complete LD  
11  
12 between a pair of SNPs).  
13  
14  
15

16 **Supplemental Fig. 1** The structure of the human ANXA11 gene and 15 SNPs located  
17  
18 on the gene.  
19  
20

21 8

22 9

23 10

24 11

25 12

26 13

27 14

28 15

29 16

30 17

31 18

32 19

33 20

34 21

35 22



1  
2  
3  
4 **Reference**  
5

- 6 1. Iannuzzi MC, Rybicki BA, Teirstein AS. Sarcoidosis. *N Engl J Med* 2007;  
7  
8 357:2153-65.  
9  
10 2. Baughman RP, Lower EE, du Bois RM. Sarcoidosis. *Lancet* 2003;361:1111-8  
11  
12 3. Grunewald J. Review: role of genetics in susceptibility and outcome of sarcoidosis.  
13  
14 *Semin Respir Crit Care Med* 2010;31:380-9.  
15  
16 4. Hofmann S, Franke A, Fischer A, *et al.* Genome-wide association study identifies  
17  
18 ANXA11 as a new susceptibility locus for sarcoidosis. *Nat Genet*  
19  
20 2008;40:1103-6.  
21  
22 5. Gerke V, Moss SE. Annexins: from structure to function. *Physiol Rev*  
23  
24 2002;82:331-71.  
25  
26 6. Farnaes L, Ditzel HJ. Dissecting the cellular functions of annexin XI using  
27  
28 recombinant human annexin XI-specific autoantibodies cloned by phage  
29  
30 display. *J Biol Chem* 2003;278:33120-6.  
31  
32 7. Tomas A, Futter C, Moss SE. Annexin 11 is required for midbody formation and  
33  
34 completion of the terminal phase of cytokinesis. *J Cell Biol* 2004;165:813-22.  
35  
36 8. Petzmann S, Maercker C, Markert E, *et al.* Enhanced proliferation and decreased  
37  
38 apoptosis in lung lavage cells of sarcoidosis patients. *Sarcoidosis Vasc Diffuse*  
39  
40 *Lung Dis* 2006;23:190-200  
41  
42 9. Dubaniewicz A, Trzonkowski P, Dubaniewicz-Wybieralska M, *et al.* Comparative  
43  
44 analysis of mycobacterial heat shock proteins-induced apoptosis of peripheral  
45  
46 blood mononuclear cells in sarcoidosis and tuberculosis. *J Clin Immunol*  
47  
48  
49  
50  
51  
52  
53  
54  
55  
56  
57  
58  
59  
60

- 1  
2  
3  
4 1 2006;26:243-50.  
5  
6 2 10. Agostini C, Trentin L, Facco M, *et al.* Role of IL-15, IL-2, and their receptors in  
7  
8 3 the development of T cell alveolitis in pulmonary sarcoidosis. *J Immunol*  
9  
10 4 1996;157:910-8  
11  
12 5 11. Jullien D, Sieling PA, Uyemura K, *et al.* IL-15, an immunomodulator of T cell  
13  
14 6 responses in intracellular infection. *J Immunol* 1997;158:800-6  
15  
16 7 12. Muller-Quernheim J, Schurmann M, *et al.* Genetics of sarcoidosis. *Clin Chest*  
17  
18 8 *Med* 2008;29:391-414.  
19  
20 9 13. Morais A, Lima B, Peixoto M, *et al.* Annexin A11 gene polymorphism (R230C  
21  
22 10 variant) and sarcoidosis in a Portuguese population. *Tissue antigens*  
23  
24 11 2013;82:186-91.  
25  
26 12 14. Li Y, Pabst S, Kubisch C, *et al.* First independent replication study confirms the  
27  
28 13 strong genetic association of ANXA11 with sarcoidosis. *Thorax*  
29  
30 14 2010;65:939-40.  
31  
32 15 15. Gabriel SB, Schaffner SF, Nguyen H, *et al.* The structure of haplotype blocks in  
33  
34 16 the human genome. *Science* 2002;296:2225-9.  
35  
36 17 16. Barrett JC, Fry B, Maller J, *et al.* Haploview: analysis and visualization of LD and  
37  
38 18 haplotype maps. *Bioinformatics* 2005;21:263-5.  
39  
40 19 17. Curtis D, Knight J, Sham PC. Program report: GENECOUNTING support  
41  
42 20 programs. *Ann Hum Genet* 2006;70:277-9.  
43  
44 21 18. Zhao JH, Curtis D, Sham PC. Model-free analysis and permutation tests for allelic  
45  
46 22 associations. *Hum Hered* 2000;50:133-9.  
47  
48  
49  
50  
51  
52  
53  
54  
55  
56  
57  
58  
59  
60

- 1  
2  
3  
4 19. Zhao JH, Lissarrague S, Essioux L, et al. GENECOUNTING: haplotype analysis  
5  
6 with missing genotypes. *Bioinformatics* 2002;18:1694-5  
7  
8  
9 20. Zhao JH, Sham PC. Generic number systems and haplotype analysis. *Comput*  
10  
11 *Methods Programs Biomed* 2003;70:1-9  
12  
13  
14 21. Mrazek F, Stahelova A, Kriegova E, et al. Functional variant ANXA11 R230C:  
15  
16 true marker of protection and candidate disease modifier in sarcoidosis. *Genes*  
17  
18 *Immun* 2011;12:490-4.  
19  
20  
21 22. Levin AM, Iannuzzi MC, Montgomery CG, et al. Association of ANXA11 genetic  
22  
23 variation with sarcoidosis in African Americans and European Americans.  
24  
25 *Genes Immun* 2013;14:13-8.  
26  
27  
28  
29 24. Tomas A, Moss SE. Calcium- and cell cycle-dependent association of annexin 11  
30  
31 with the nuclear envelope. *J Biol Chem* 2003;278:20210-6.  
32  
33  
34  
35  
36  
37  
38  
39  
40  
41  
42  
43  
44  
45  
46  
47  
48  
49  
50  
51  
52  
53  
54  
55  
56  
57  
58  
59  
60

1 **Table 1** Genotypic and allelic frequencies of ANXA11 polymorphisms in the controls  
 2 and patients with sarcoidosis

| Variable     | Controls (n=418 ) |      | Sarcoidosis (n=412) |      | P-value <sup>a</sup> | OR, 95% CI      |
|--------------|-------------------|------|---------------------|------|----------------------|-----------------|
|              | No.               | %    | No.                 | %    |                      |                 |
| rs2789679    |                   |      |                     |      | 0.0007               |                 |
| TT           | 114               | 27.3 | 94                  | 22.8 | 0.140                | 1.27, 0.93-1.74 |
| AT           | 225               | 53.8 | 186                 | 45.2 | 0.012                | 1.42, 1.08-1.87 |
| AA           | 79                | 18.9 | 132                 | 32.0 | 0.0002               | 0.49, 0.36-0.68 |
| Per A allele | 383               | 45.8 | 450                 | 54.6 | 0.00004              | 1.42, 1.17-1.73 |
| rs1049550    |                   |      |                     |      | 0.0002               |                 |
| CC           | 154               | 36.8 | 208                 | 50.5 | 0.0007               | 0.57, 0.43-0.75 |
| CT           | 190               | 45.5 | 170                 | 41.3 | 0.221                | 1.19, 0.90-1.56 |
| TT           | 74                | 17.7 | 34                  | 8.3  | 0.0008               | 2.39, 1.55-3.68 |
| Per T allele | 338               | 40.4 | 238                 | 28.8 | 0.000002             | 0.61, 0.49-0.74 |
| rs2819941    |                   |      |                     |      | 0.0002               |                 |
| CC           | 114               | 27.3 | 94                  | 22.8 | 0.141                | 1.27, 0.93-1.74 |
| CT           | 226               | 54.1 | 190                 | 46.1 | 0.021                | 1.38, 1.05-1.81 |
| TT           | 78                | 18.7 | 128                 | 31.1 | 0.0004               | 0.51, 0.37-0.70 |
| Per T allele | 382               | 45.7 | 446                 | 54.1 | 0.0006               | 1.41, 1.16-1.71 |

3 <sup>a</sup> P-value was calculated by 2×3 and 2×2 chi-squared tests based on codominant,  
 4 dominant for the rare allele, heterosis and recessive for the rare allele models of  
 5 inheritance.

6 Alpha value is adjusted by Bonferroni correction and statistically significant results  
 7 (P<0.003)

1

2 **Table 2** ANXA11 haplotype in block 2 frequencies and the results of their associations with risk  
 3 of sarcoidosis

| Haplotype |           |           | Genecounting (frequency %) |          |                              |                              |
|-----------|-----------|-----------|----------------------------|----------|------------------------------|------------------------------|
| ID        | rs1049550 | rs2573351 | Cases                      | Controls | <i>P</i> -value <sup>a</sup> | Global <i>P</i> <sup>b</sup> |
| HAP1      | T         | C         | 27.7                       | 39.7     | 0.001                        | 0.003                        |
| HAP2      | C         | C         | 19.9                       | 7.4      | 0.0001                       |                              |
| HAP3      | C         | T         | 50.5                       | 51.0     | 0.892                        |                              |

4 <sup>a</sup> Based on 10,000 permutations.

5 <sup>b</sup> Based on comparison of frequency distribution of all haplotypes for the combination of SNPs.

6

7 **Table 3** ANXA11 haplotype in block 3 frequencies and the results of their associations with risk  
 8 of sarcoidosis

| Haplotype |           |           | Genecounting (frequency %) |          |                              |                              |
|-----------|-----------|-----------|----------------------------|----------|------------------------------|------------------------------|
| ID        | rs2789695 | rs2573356 | Cases                      | Controls | <i>P</i> -value <sup>a</sup> | Global <i>P</i> <sup>b</sup> |
| HAP1      | C         | T         | 33.7                       | 34.9     | 0.718                        | 0.045                        |
| HAP2      | T         | T         | 15.3                       | 14.1     | 0.632                        |                              |
| HAP2      | T         | T         | 15.6                       | 14.1     | 0.565                        |                              |

9 <sup>a</sup> Based on 10,000 permutations.

10 <sup>b</sup> Based on comparison of frequency distribution of all haplotypes for the combination of SNPs.

11

12

13

14

15

1 **Table 4** Chest radiographic (CXR) stages of sarcoidosis patients by genotype of  
 2 rs2789679, rs1049550 and rs2819941

| Stages         | rs2789679 (n, %) |              |              | rs1049550* (n, %) |              |              | rs2819941 (n, %) |              |              |
|----------------|------------------|--------------|--------------|-------------------|--------------|--------------|------------------|--------------|--------------|
|                | AA               | AT           | TT           | CC                | CT           | TT           | CC               | CT           | TT           |
| stage I        | 59<br>(30.1)     | 92<br>(47.0) | 45<br>(23.0) | 101<br>(51.5)     | 82<br>(41.8) | 13<br>(6.6)  | 47<br>(25.0)     | 88<br>(44.9) | 61<br>(31.1) |
| stages II - IV | 46<br>(27.6)     | 75<br>(44.9) | 46<br>(27.6) | 72<br>(43.1)      | 68<br>(40.7) | 27<br>(16.2) | 41<br>(24.6)     | 73<br>(43.7) | 53<br>(31.7) |
| $\chi^2, P$    | 1.041, 0.594     |              |              | 8.807, 0.012      |              |              | 0.052, 0.975     |              |              |

3 \*  $P$  values for genotype frequency distribution ( $P < 0.05$ ).

4

1  
2  
3  
4 1 **Annexin A11 (ANXA11) gene polymorphisms are associated with sarcoidosis in a**

5  
6 2 **Han Chinese population - a case-control study**

7  
8  
9 3 LG Zhang, ZJ Xiao\*, GC Shi, J Huang, CX Zhang

10  
11 4 The Third Department of Tuberculosis, the First Hospital Affiliated to the Xinxiang

12  
13  
14 5 Medical College, Xinxiang, Henan, PR China

15  
16 6 \*Corresponding author: Zhijian Xiao, The Third Department of Tuberculosis, the First

17  
18  
19 7 Hospital Affiliated to the Xinxiang Medical College, Xinxiang, Henan, PR China.

20  
21 8 No.88 Jiankang Road, Weihui City, Henan, 463000, PR China

22  
23  
24 9 E-mail: zhangligongys@163.com

25  
26 10 Tel: +86 0373 - 4402229 (office)

27  
28  
29 11 Fax: +86 0373 -4402251

30  
31 12 **Key words:** Sarcoidosis; Annexin A11; Single-nucleotide polymorphism

32  
33  
34 13 Word count: 37873918

35  
36  
37  
38  
39  
40  
41  
42  
43  
44  
45  
46  
47  
48  
49  
50  
51  
52  
53  
54  
55  
56  
57  
58  
59  
60 14

1  
2  
3  
4 **Abstract**

5  
6 **Objectives:** To further identify the single-nucleotide polymorphisms (SNPs) that  
7  
8  
9  
10  
11  
12  
13  
14  
15  
16  
17  
18  
19  
20  
21  
22  
23  
24  
25  
26  
27  
28  
29  
30  
31  
32  
33  
34  
35  
36  
37  
38  
39  
40  
41  
42  
43  
44  
45  
46  
47  
48  
49  
50  
51  
52  
53  
54  
55  
56  
57  
58  
59  
60  
3 contribute to the genetic susceptibility to sarcoidosis, we examined the potential  
4 association between sarcoidosis and fifteen SNPs of the ANXA11 gene.

5 **Design:** A case - control study.

6 **Setting:** A tuberculosis unit in a hospital of the university in China.

7 **Participants:** Participants included 412 patients with sarcoidosis and 418 healthy  
8  
9  
10  
11  
12  
13  
14  
15  
16  
17  
18  
19  
20  
21  
22  
23  
24  
25  
26  
27  
28  
29  
30  
31  
32  
33  
34  
35  
36  
37  
38  
39  
40  
41  
42  
43  
44  
45  
46  
47  
48  
49  
50  
51  
52  
53  
54  
55  
56  
57  
58  
59  
60  
8 controls.

9 **Methods:** The selected SNPs were genotyped using the MALDI-TOF in the  
10  
11  
12  
13  
14  
15  
16  
17  
18  
19  
20  
21  
22  
23  
24  
25  
26  
27  
28  
29  
30  
31  
32  
33  
34  
35  
36  
37  
38  
39  
40  
41  
42  
43  
44  
45  
46  
47  
48  
49  
50  
51  
52  
53  
54  
55  
56  
57  
58  
59  
60  
MassARRAY system. Probes and primers were designed using the Assay Design  
Software (Sequenom, San Diego, CA, USA).

12 **Results:** The statistical significant differences were found in the allelic or genotypic  
13  
14  
15  
16  
17  
18  
19  
20  
21  
22  
13 frequencies of the rs2789679, rs1049550 and rs2819941 in the ANXA11 gene  
14 between the patients with sarcoidosis and the controls. The rs2789679 A allele ( $P =$   
0.00004, OR = 1.42, 95%CI = 1.17-1.73) and rs2819941 T allele ( $P = 0.0006$ , OR =  
1.41, 95%CI = 1.16-1.71) were significantly more frequent in the patients with  
sarcoidosis compared to controls. The frequency of the rs1049550 T allele ( $P =$   
0.000002, OR = 0.61, 95%CI= 0.49 - 0.74) in the patients with sarcoidosis was  
significantly lower than that in the controls. The frequency of the T allele in  
rs2789679 ( $P = 0.0003$ , OR = 0.70, 95%CI= 0.58 - 0.85) and rs1049550 ( $P = 0.0007$ ,  
OR = 0.62, 95%CI= 0.50 - 0.76), and C allele in rs2819941 ( $P = 0.001$ , OR = 0.71,  
95%CI = 0.59 - 0.87) in the patients with sarcoidosis was significantly lower than that



1 | ~~in the controls.~~ The strong linkage disequilibrium (LD) was observed in four blocks  
2 (D' > 0.9). In block 2 (rs1049550-rs2573351), the T - C haplotype occurred  
3 significantly less frequently ( $P = 0.001$ ), whereas the C - C haplotypes occurred more  
4 frequently ( $P = 0.0001$ ) in the patients with sarcoidosis than the controls. Furthermore,  
5 genotype frequency distribution revealed that, in rs1049550, CC genotype was  
6 significantly more in the patients with chest radiographic (CXR) stage I sarcoidosis  
7 than the patients with CXR stage II-IV sarcoidosis ( $P = 0.012$ ).

8 **Conclusions:** These findings point to a role for the polymorphisms of ANXA11 in  
9 sarcoidosis in a Chinese Han population, and may be informative for future genetic  
10 studies on sarcoidosis.

11

1  
2  
3  
4 **1 Article summary**

5  
6 **2 Article focus**

7  
8  
9 3 1. The first genome-wide association study (GWAS) in sarcoidosis conducted in a  
10  
11 4 German population has revealed that the rs1049550 (C > T, Arg230Cys) located in  
12  
13 5 exon 10 were associated with sarcoidosis.

14  
15  
16 6 2. Whether these SNPs modulate the risk of sarcoidosis by themselves or whether  
17  
18 7 they correlate with other causative SNPs and are repeated in other populations remain  
19  
20 8 unclear.

21  
22 9 3. We hypothesize that common variants in the ANXA11 gene may significantly  
23  
24 10 contribute to the predisposition to develop sarcoidosis in a Chinese Han population.

25  
26  
27  
28  
29 **11 Key messages**

30  
31 12 1. ANXA11 rs2789679 (3'-UTR) was significantly associated with sarcoidosis.

32  
33 13 2. ANXA11 rs1049550 (exon 10) was significantly associated with sarcoidosis.

34  
35 14 3. Another significant association was observed for rs2819941 (intron 14).

36  
37  
38  
39 **15 Strengths and limitations of this study**

40  
41 16 1. A systematical screening of the functional SNPs in the promoter region, 5'- and  
42  
43 17 3'-UTR, exons of the ANXA11 gene, and the homogeneity of the study subjects  
44  
45 18 representing the Chinese Han are the main strengths of this study. Chinese Han

46  
47  
48  
49 19 2. The lack of data proving the positive association observed for rs2789679 and  
50  
51 20 rs1049550 is a potential limitation of this study. Furthermore, the association of the  
52  
53 21 serum level of ANXA11 with sarcoidosis still needs to be investigated.

54  
55  
56 **22 INTRODUCTION**

1 Sarcoidosis is a systemic autoimmune disease characterized by destructive,  
2 non-caseating epithelioid granulomatous lesions, with accumulated phagocytes and  
3 activated CD4<sup>+</sup> T helper type 1 lymphocytes<sup>1 2</sup>. The typical manifestations of  
4 sarcoidosis include bilateral hilar lymphadenopathy, pulmonary infiltration and ocular  
5 and skin lesions. The clinical course and prognosis of sarcoidosis are variable. The  
6 acute forms of sarcoidosis such as Löfgren's syndrome (LS) can resolve  
7 spontaneously in most cases. However, chronic pulmonary sarcoidosis may progress  
8 to lung fibrosis which eventually causes respiratory failure. Recent studies have  
9 demonstrated that sarcoidosis can occur in a pattern of family clustering, and its racial  
10 incidence is also different, suggesting that some genetic factors may contribute to the  
11 risk and severity of sarcoidosis<sup>13</sup>.

12 The Annexin gene family is involved in the etiology of several autoimmune and  
13 chronic diseases<sup>4 5</sup>. One member of the Annexin gene family, ANXA11, located on  
14 chromosome 10q22.3, is involved in calcium signaling, apoptosis, vesicle trafficking,  
15 cell growth and terminal phase of cell division<sup>5-7</sup>. In this context, the development  
16 and maintenance of the granulomatous inflammation in sarcoidosis have been  
17 repeatedly associated with the impaired apoptosis of activated inflammatory cells<sup>8 9</sup>.  
18 Most of the early-stage sarcoidosis is characterized by mononuclear cell alveolitis  
19 dominated by activated CD4<sup>+</sup> T cells and macrophages. Between these cells, the  
20 uncoordinated interplay results in the formation of typical non-caseating granulomas.  
21 The mechanism by which the granulomas resolve has not been fully elucidated.  
22 However, it is generally assumed that the induction of apoptosis and/or by the

1  
2  
3  
4 1 withdrawal of inflammatory cytokines participates in the disappearance of  
5  
6 2 granulomas<sup>10 11</sup>. In the patients with sarcoidosis, their peripheral blood monocytes  
7  
8  
9 3 were characterized by apoptosis<sup>9</sup>.

10  
11 4 In previous studies, case - control/family ‘hypothesis - driven’ studies and low  
12  
13 5 density linkage scans were used to identify genetic factors conferring the genetic  
14  
15 6 susceptibility to sarcoidosis<sup>12</sup>. Notably, the first genome - wide association study  
16  
17 7 (GWAS) in sarcoidosis conducted in a German population has recently revealed an  
18  
19 8 association: the leading rs2789679 SNP (single - nucleotide polymorphism) located in  
20  
21 9 the 3’-untranslated region (3’-UTR) and a common nonsynonymous SNP (rs1049550,  
22  
23 10 C > T, Arg230Cys) were associated with the increased risk of sarcoidosis<sup>4 13</sup>. This  
24  
25 11 association has recently been supported by another report from the same population<sup>14</sup>.  
26  
27 12 Thus, more studies should be performed to demonstrate the following items: whether  
28  
29 13 these SNPs modulate the risk of sarcoidosis by themselves or whether they correlate  
30  
31 14 with other causative SNPs and are repeated in other populations. The published  
32  
33 15 studies about the association of sarcoidosis and ANXA11 are summarized in  
34  
35 16 Supplemental table 1. We hypothesize that common variants in the ANXA11 gene  
36  
37 17 may significantly contribute to the predisposition to develop sarcoidosis.  
38  
39  
40  
41  
42  
43  
44  
45

46 18 In this study, we investigated fifteen loci in a Chinese population from He’nan  
47  
48 19 province (China) to verify the putative association between ANXA11 polymorphisms  
49  
50 20 and sarcoidosis.  
51

## 52 21 **SUBJECTS AND METHODS**

### 53 22 **Subjects**

1  
2  
3  
4 1 Four hundred and twelve patients with sarcoidosis (mean  $\pm$  SD age:  $53.6 \pm 4.6$   
5  
6 2 years; 155 men and 257 women) were recruited from our hospital between May 2005  
7  
8  
9 3 and March 2013. Sarcoidosis was diagnosed by the evidence of non-caseating  
10  
11 4 epitheloid cell granuloma in biopsy specimens and chest radiographic abnormalities.  
12  
13  
14 5 Chronic sarcoidosis was defined as a disease over at least 2 years or at least two  
15  
16 6 episodes in a lifetime. A acute sarcoidosis was defined as one episode of acute  
17  
18  
19 7 sarcoidosis which had totally resolved at the date of the examination. The control  
20  
21 8 group consisted of 418 unrelated healthy subjects (mean  $\pm$  SD age:  $54.2 \pm 5.3$  years;  
22  
23  
24 9 160 men and 258 women) who underwent health examinations in the Medical  
25  
26  
27 10 Examination Center of the First Affiliated Hospital of the Xinxiang Medical College  
28  
29 11 (Xinxiang, China) between Oct 2009 and Sept 2013. None of the individuals in the  
30  
31 12 control group had a history of lung diseases or showed any symptoms of the lung or  
32  
33  
34 13 other diseases by chest radiography or laboratory blood tests. Participants were  
35  
36  
37 14 excluded if they: were taking other prescribed medications that could affect the  
38  
39 15 central nervous system; had a history of seizures, hematological diseases, or severe  
40  
41 16 liver or kidney impairment; or were pregnant. No familial relationship was known  
42  
43  
44 17 between the study participants. The study was performed according to the Guidelines  
45  
46 18 of the Medical Ethical Committee of Xinxiang Medical College (Xinxiang, China).  
47  
48  
49 19 Written informed consent was obtained from each participant in this study.

#### 50 51 **SNP selection**

52  
53  
54 21 Tagging SNPs were selected from the catalogs of the International HapMap  
55  
56 22 Project. The rs2789679 and rs2245168 are located in 5'-UTR, rs2236558 in intron 6,  
57  
58  
59  
60

1  
2  
3  
4 1 rs7067644 and rs12763624 in intron 8, rs1049550 in exon 10, rs2573351 in intron 13,  
5  
6 2 rs10887581, rs11201989, rs2573353, rs2789695, rs2573356, rs2819945, rs11202059  
7  
8  
9 3 and rs2819941 in intron 14 (Supplemental figure 1). Marker selection was based on  
10  
11 4 the following criteria. (a) We used the CHB data from the HapMap (release 27) to  
12  
13 5 select tagSNPs for ANXA11. (b) We restricted our search for tagSNPs from base pair  
14  
15 6 80155124 to 80205677. (c) Further, we limited the SNPs to tag to those with a minor  
16  
17 7 allele frequency  $\geq 0.2$  in the CHB. (d) Based on these restrictions, there were a total  
18  
19 8 of 29 SNPs. (e) Using HAPLOVIEW with an  $r^2$  threshold  $\geq 0.8$ , 15 tagSNP were  
20  
21 9 selected and used for subsequent analyses.  
22  
23  
24  
25

## 26 **Genotyping**

27  
28  
29 11 Peripheral blood was collected from a vein into a sterile tube coated with  
30  
31 12 ethylenediamine tetraacetic acid (EDTA). Plasma samples were stored at  $-20^{\circ}\text{C}$ .  
32  
33 13 Genomic DNA was extracted from the frozen peripheral blood samples using a  
34  
35 14 QIAmp Blood Mini Kit (Qiagen Inc., Valencia, CA, USA) according to the  
36  
37 15 manufacturer's protocols. The selected SNPs were genotyped in cases and controls by  
38  
39 16 using the MALDI-TOF in the MassARRAY system (Sequenom Inc., San Diego, CA,  
40  
41 17 USA). Probes and primers were designed using the Assay Design Software  
42  
43 18 (Sequenom, San Diego, CA, USA). The completed genotyping reactions were spotted  
44  
45 19 onto a 384 well spectroCHIP (Sequenom) using the MassARRAY Nanodispenser  
46  
47 20 (Sequenom) and determined by the matrix - assisted laser desorption ionization time -  
48  
49 21 of - flight mass spectrometer. Genotype calling was performed in realtime with the  
50  
51 22 MassARRAY RT software version 3.0.0.4 and analyzed using the MassARRAY Typer  
52  
53  
54  
55  
56  
57  
58  
59  
60

1 software version 3.4 (Sequenom).

## 2 **Statistical analysis**

3 All data were analyzed using the SPSS 17.0 software (SPSS Inc., Chicago, IL,  
4 USA). Hardy-Weinberg equilibrium was evaluated by Chi-square tests. Differences  
5 between the cases and controls in the frequency of the alleles, genotypes and  
6 haplotypes were evaluated by the Fisher's exact test or the Pearson Chi-square test.  
7 Unconditional logistic regression was used to calculate the odds ratio (OR) and 95%  
8 confidence interval (CI) in independent association between each locus and the  
9 presence of sarcoidosis. ~~Logistic regression was used to evaluate the interaction~~  
10 ~~effects between gene and gender or age.~~ Gender and age of subjects were treated as  
11 covariants in binary logistic regression. *P* values were calculated based on  
12 codominant, dominant for the rare allele, heterosis and recessive for the rare allele  
13 models of inheritance. Models of multiple logistic regression were used to test the  
14 independence of individual allelic effect. In detail, the most significant SNP was  
15 chosen to be the conditional SNP (covariate in the regression model) when testing  
16 other significant SNPs; Meanwhile, a multi-SNP model including all significant SNPs  
17 was also performed. The Bonferroni correction was used to adjust the test level when  
18 multiple comparisons were conducted, and the *P* value was divided by the total  
19 number of loci. Haplotype blocks were defined according to the criteria developed by  
20 Gabriel et al. <sup>15</sup>. Pair-wise LD statistics ( $D'$  and  $r^2$ ) and haplotype frequency were  
21 calculated, and haplotype blocks were constructed using the Haploview 4.0 <sup>16</sup>. To  
22 ensure that the LD blocks most closely reflect the population level LD patterns,

1 definition of the blocks were based on the control samples alone. The haplotype  
2 frequencies were estimated using GENECOUNTING, which computes maximum -  
3 likelihood estimates of haplotype frequencies from unknown phase data by utilizing  
4 an expectation - maximization algorithm <sup>17-20</sup>. The significance of any haplotypic  
5 association was evaluated using a likelihood ratio test, followed by permutation  
6 testing that compared estimated haplotype frequencies in cases and controls <sup>17 19</sup>.

## 7 RESULTS

8 The genotype distribution of the fifteen polymorphisms was consistent with the  
9 Hardy-Weinberg equilibrium ( $P > 0.05$ ). The analysis of strong LD in the patients  
10 with sarcoidosis and healthy controls revealed that 2 SNPs (rs2245168, rs2236558), 2  
11 SNPs (rs1049550, rs2573351), 2 SNPs (rs2789695, rs2573356) and 3 SNPs  
12 (rs2819945, rs11202059, rs2819941) were located in haplotype block 1, block 2,  
13 block 3 and block 4 ( $D' > 0.9$ , Fig. 1). The genotype distribution, allelic frequencies,  
14 and haplotypes in the patients with sarcoidosis and healthy controls are showed in  
15 Tables 1-3 and Supplemental table 2

16 Comparison of genotype and allele frequency distribution revealed significant  
17 differences between the patients with sarcoidosis and healthy controls for 3 SNPs:  
18 rs2789679, rs1049550 and rs2819941. The rs2789679 A allele ( $P = 0.00004$ , OR =  
19 1.42, 95%CI = 1.17-1.73) and rs2819941 T allele ( $P = 0.0006$ , OR = 1.41, 95%CI =  
20 1.16-1.71) were significantly more frequent in the patients with sarcoidosis compared  
21 to controls. The frequency of the rs1049550 T allele ( $P = 0.000002$ , OR = 0.61,  
22 95%CI= 0.49-0.74) in the patients with sarcoidosis was significantly lower than that



1 ~~in the controls. The frequency of the T allele in rs2789679 ( $P = 0.0003$ , OR = 0.70,~~  
2 ~~95%CI = 0.58–0.85) and rs1049550 ( $P = 0.0007$ , OR = 0.62, 95%CI = 0.50–0.76),~~  
3 ~~and C allele in rs2819941 ( $P = 0.001$ , OR = 0.71, 95%CI = 0.59–0.87) in the patients~~  
4 ~~with sarcoidosis was significantly lower than that in the controls, and these~~  
5 differences remained statistically significant after Bonferroni corrections.

6 ~~The multi-SNP model showed only rs1049550 present a significant effect on the~~  
7 ~~disease phenotype ( $p < 0.001$ ). No independent effect was found for rs2789679 or~~  
8 ~~rs2819941 when adjusting for the effect of rs1049550. Both individual SNP and multi -~~  
9 ~~SNP analysis supported rs1049550: T allele was an important protective factor for~~  
10 ~~affecting sarcoidosis (odds ratio around 0.6). In another word, carriers of rs1049550:~~  
11 ~~C allele have higher susceptibility to sarcoidosis in our Chinese Han population~~  
12 ~~(Supplemental table 3).~~

13 ~~We presented a multi-SNP model of sarcoidosis risk. We screen out the most~~  
14 ~~significant model to predict the risk by forward stepwise strategy in logistic regression,~~  
15 ~~and found that a model includes rs2789679 and rs1049550 is the best one~~  
16 ~~(Supplemental table 3), which suggests that there is a interaction between them.~~

17 We performed an association analysis to determine whether the haplotype was  
18 associated with the risk of sarcoidosis (Global  $P < 0.05$  in block 2 and block 3).  
19 Compared with the controls, the T - C haplotype occurred significantly less frequently  
20 ( $P = 0.001$ ) but the C - C haplotypes occurred more frequently ( $P = 0.0001$ ) in block 2  
21 (rs1049550 - rs2573351) in the patients with sarcoidosis.

22 To assess particular disease phenotypes, the patients with sarcoidosis were

1 divided into the subgroups according to their chest radiographic (CXR) stage. CXR  
2 stage I (isolated bilateral hilar lymphadenopathy): N = 196; CXR stages II - IV  
3 (infiltration of parenchyma): 167; CXR stage 0 (absence on pulmonary disease): N =  
4 28; the information on CXR stage was not available for 21 patients. Genotype  
5 frequency distribution revealed that, in rs1049550, CC genotype was significantly  
6 more in the patients with chest radiographic (CXR) stage I sarcoidosis than the  
7 patients with CXR stage II-IV sarcoidosis ( $P = 0.012$ ). (Table 4).

## 8 DISCUSSION

9 A key step in linkage and association studies is to identify common risk variants  
10 in different populations. To determine if common risk variants exist in distinct  
11 populations, fifteen SNPs which span approximately 0.53 Mb of the ANXA11 gene,  
12 were genotyped in samples from the patients with sarcoidosis and healthy controls in  
13 a Chinese Han population. Recently, new sarcoidosis loci have been identified by  
14 genome-wide association studies<sup>4 14</sup>. With the fast development of genome - wide  
15 association studies, an increasing number of susceptibility loci for sarcoidosis have  
16 been found in different populations<sup>4 14 21</sup>. However, these observations should be  
17 confirmed in other genetically independent populations. In this study, we conducted  
18 the first large genetic association study of the ANXA11 gene in a Chinese Han  
19 population. The evidence of markers associated with sarcoidosis was presented, and  
20 these markers were mapped to different locations in the ANXA11 gene (81897864 -  
21 81951001). The association signals in the region were identified, and some  
22 significantly associated haplotypes also appeared this region.

1 Hoffman et al. reported an association between the T allele of the non -  
2 synonymous SNP rs1049550 and significantly decreased risk of sarcoidosis in a  
3 German population <sup>4</sup>. Similar results were also obtained in other two European  
4 populations <sup>14 21</sup>. As a part of the sarcoidosis GWAS done in Americans <sup>22</sup>, we further  
5 confirmed this association in a Chinese Han population. In this study, the frequency of  
6 ANXA11 rs1049550 T allele was significantly lower in the patients with sarcoidosis  
7 than the healthy controls. ~~There is interaction between rs2789679 and rs1049550.~~  
8 Genotype frequency distribution revealed that, in rs1049550, CC genotype was  
9 significantly more in the patients with stage I sarcoidosis than the patients with stage  
10 II-IV sarcoidosis. The “protective” effect of ANXA11 T allele increased with the  
11 number of its copies in the genotype, which is consistent with the result obtained in  
12 the patients with sarcoidosis in a German population <sup>4</sup>. Furthermore, the T allele  
13 carriers among the patients were protected from infiltration of lung parenchyma  
14 (radiographic stages II-IV) <sup>21</sup>. We have also demonstrated that rs1049550 is  
15 significant cross - ethnically at the gene level after adjustment for the single SNP  
16 association tests performed. The mechanism by which rs1049550 affects the  
17 susceptibility to sarcoidosis is that the SNP may affect the function of the ANXA11  
18 protein rather than affect its expression. In humans, the ANXA11 protein consists of  
19 an N - terminalproline - tyrosine - glycine (PYG) - rich region, followed by four  
20 annexin core domains. The rs1049550 leads to an amino - acid exchange (basic  
21 arginine to a polar cysteine) at the evolutionarily conserved position 230 (R230C) in  
22 the first annexin domain, which is responsible for Ca<sup>2+</sup> - dependent trafficking of the

1 protein in the cell <sup>23</sup>.

2 In the GWAS conducted by Hofmann et al <sup>4</sup>, the strongest association signal was  
3 observed for rs2789679. This marker is located in the 3'-UTR of the ANXA11 gene.

4 The T allele had a frequency of 35% among the patients with sarcoidosis and 44% in  
5 the healthy controls, with 13% of the patients with sarcoidosis and 19% of controls  
6 being TT homozygous. Fine-mapping in the Black Women's Health Study (BWHS)  
7 revealed rs2819941 to be the top SNP, associated with a non-significant ( $P = 0.06$ )

8 reduction in the risk of sarcoidosis (17% reduction per copy of the C-allele). In this  
9 case-control association study, the frequency of the ~~T~~A allele in rs2789679 and the  
10 rs2819941 ~~C~~T allele frequency in the patients with sarcoidosis was significantly  
11 ~~lower~~higher than that in the healthy controls. Several lines of evidence suggest that

12 the observed association is unlikely to be an artifact. First, both the single-SNP and  
13 the haplotype-based association analyses support the current finding. Second, our  
14 samples were from the same geographical region, excluding the. Finally, consistent  
15 results were obtained from two genetically independent populations (Chinese Han and

16 Europeans). Collectively, our results confirmed the strong association between  
17 ANXA11 polymorphisms and sarcoidosis, suggesting that ANXA11 represents a

18 strong genetic risk factor for sarcoidosis. Since causal SNP in ANXA11 was not  
19 known, all the SNPs significantly associated with sarcoidosis were actually indirect  
20 association through the real causal one. Though rs2789679 and rs2819941 were not in  
21 LD with rs1049550, it may not tag the causal SNP as well as rs1049550. Hence, their  
22 individual effects were eliminated when controlling for the effect of rs1049550.

1 We further investigated the interaction among polymorphisms and observed  
2 strong LD. The haplotype analysis revealed that significantly more C - C (block 2,  
3 rs1049550 - rs2573351) and significantly fewer T - C haplotypes (block 2) were  
4 found in the patients with sarcoidosis. These results indicated that the patients with C  
5 - C (block 2) haplotypes of the ANXA11 gene were more prone to sarcoidosis.  
6 Significantly higher frequencies of T - C haplotypes were detected in the healthy  
7 controls than in the patients with sarcoidosis, suggesting that they may show  
8 protective effects against sarcoidosis. Our sample size can detect SNP and haplotype  
9 associations with 90% and 85% power, respectively, at a false positive rate of 5%,  
10 disease prevalence of 1%, disease allele / haplotype frequency of 0.05 / 0.03, and a  
11 presumed odds ratio (OR) of 1.5. To some extent, this finding further supports a role  
12 of ANXA11 polymorphisms in sarcoidosis, while ethnic group difference may exist.

13 In conclusion, our study suggests a potential role of the ANXA11 SNPs and their  
14 related haplotypes in the genetic susceptibility to sarcoidosis. Further studies are  
15 needed to investigate how these SNPs affect the function of ANXA11.

#### 16 **Contributors**

17 LG Zhang was involved in conception and design of the study, acquisition of  
18 patient data, genotyping and drafted the paper. ZJ Xiao and GC Shi were involved in  
19 design of the study, genotyping and interpretation of results. J Huang and CX Zhang  
20 were involved in the design of the study, acquisition of patient data and interpretation  
21 of result. All authors revised the draft paper.

#### 22 **Funding**

1  
2  
3  
4 1 The project was supported by the Research and Development Foundation of  
5  
6 2 Science and Technology of Henan Province (2012k15).  
7

8  
9 **3 Competing interests**

10  
11 4 None.

12  
13 **5 Patient consent**

14  
15  
16 6 Obtained.

17  
18 **7 Ethics approval**

19  
20  
21 8 Ethics approval was provided by the First Hospital Affiliated to the Xinxiang  
22  
23 9 Medical College.

24  
25 **10 Provenance and peer review**

26  
27  
28 11 Not commissioned; externally peer reviewed.

29  
30 **12 Data sharing statement**

31  
32  
33 13 No additional data are available.

34  
35 **14 Figure Legend**

36  
37  
38 **15 Fig. 1** The LD plot of the fifteen SNPs in the ANXA11 gene. Values in squares are the  
39  
40 pair-wise calculation of  $r^2$  (left) or  $D'$  (right). Black squares indicate  $r^2 = 1$  (i.e. perfect  
41  
42 LD between a pair of SNPs). Empty squares indicate  $D' = 1$  (i.e. complete LD  
43  
44 between a pair of SNPs).  
45  
46  
47

48  
49 **19 Supplemental Fig. 1** The structure of the human ANXA11 gene and 15 SNPs located  
50  
51 on the gene.  
52

53  
54 **21 Reference**

55  
56 22 1. Iannuzzi MC, Rybicki BA, Teirstein AS. Sarcoidosis. *N Engl J Med* 2007;  
57  
58  
59  
60

- 1  
2  
3  
4 1 357:2153-65.  
5  
6 2. Baughman RP, Lower EE, du Bois RM. Sarcoidosis. *Lancet* 2003;361:1111-8  
7  
8  
9 3. Grunewald J. Review: role of genetics in susceptibility and outcome of sarcoidosis.  
10  
11 *Semin Respir Crit Care Med* 2010;31:380-9.  
12  
13 4. Hofmann S, Franke A, Fischer A, *et al.* Genome-wide association study identifies  
14 ANXA11 as a new susceptibility locus for sarcoidosis. *Nat Genet*  
15 2008;40:1103-6.  
16  
17  
18 5. Gerke V, Moss SE. Annexins: from structure to function. *Physiol Rev*  
19 2002;82:331-71.  
20  
21 6. Farnaes L, Ditzel HJ. Dissecting the cellular functions of annexin XI using  
22 recombinant human annexin XI-specific autoantibodies cloned by phage  
23 display. *J Biol Chem* 2003;278:33120-6.  
24  
25  
26 7. Tomas A, Futter C, Moss SE. Annexin 11 is required for midbody formation and  
27 completion of the terminal phase of cytokinesis. *J Cell Biol* 2004;165:813-22.  
28  
29 8. Petzmann S, Maercker C, Markert E, *et al.* Enhanced proliferation and decreased  
30 apoptosis in lung lavage cells of sarcoidosis patients. *Sarcoidosis Vasc Diffuse*  
31 *Lung Dis* 2006;23:190-200  
32  
33 9. Dubaniewicz A, Trzonkowski P, Dubaniewicz-Wybieralska M, *et al.* Comparative  
34 analysis of mycobacterial heat shock proteins-induced apoptosis of peripheral  
35 blood mononuclear cells in sarcoidosis and tuberculosis. *J Clin Immunol*  
36 2006;26:243-50.  
37  
38  
39 10. Agostini C, Trentin L, Facco M, *et al.* Role of IL-15, IL-2, and their receptors in  
40  
41  
42  
43  
44  
45  
46  
47  
48  
49  
50  
51  
52  
53  
54  
55  
56  
57  
58  
59  
60

- 1  
2  
3  
4 1 the development of T cell alveolitis in pulmonary sarcoidosis. *J Immunol*  
5  
6 2 1996;157:910-8  
7  
8  
9 3 11. Jullien D, Sieling PA, Uyemura K, *et al.* IL-15, an immunomodulator of T cell  
10  
11 4 responses in intracellular infection. *J Immunol* 1997;158:800-6  
12  
13 5 12. Muller-Quernheim J, Schurmann M, Hofmann S, *et al.* Genetics of sarcoidosis.  
14  
15 6 *Clin Chest Med* 2008;29:391-414.  
16  
17 7 13. Morais A, Lima B, Peixoto M, *et al.* Annexin A11 gene polymorphism (R230C  
18  
19 8 variant) and sarcoidosis in a Portuguese population. *Tissue antigens*  
20  
21 9 2013;82:186-91.  
22  
23 10 14. Li Y, Pabst S, Kubisch C, *et al.* First independent replication study confirms the  
24  
25 11 strong genetic association of ANXA11 with sarcoidosis. *Thorax*  
26  
27 12 2010;65:939-40.  
28  
29 13 15. Gabriel SB, Schaffner SF, Nguyen H, *et al.* The structure of haplotype blocks in  
30  
31 14 the human genome. *Science* 2002;296:2225-9.  
32  
33 15 16. Barrett JC, Fry B, Maller J, *et al.* Haploview: analysis and visualization of LD and  
34  
35 16 haplotype maps. *Bioinformatics* 2005;21:263-5.  
36  
37 17 17. Curtis D, Knight J, Sham PC. Program report: GENECOUNTING support  
38  
39 18 programs. *Ann Hum Genet* 2006;70:277-9.  
40  
41 19 18. Zhao JH, Curtis D, Sham PC. Model-free analysis and permutation tests for allelic  
42  
43 20 associations. *Hum Hered* 2000;50:133-9.  
44  
45 21 19. Zhao JH, Lissarrague S, Essioux L, *et al.* GENECOUNTING: haplotype analysis  
46  
47 22 with missing genotypes. *Bioinformatics* 2002;18:1694-5  
48  
49  
50  
51  
52  
53  
54  
55  
56  
57  
58  
59  
60



- 1  
2  
3  
4 20. Zhao JH, Sham PC. Generic number systems and haplotype analysis. *Comput*  
5  
6 *Methods Programs Biomed* 2003;70:1-9  
7  
8  
9 21. Mrazek F, Stahelova A, Kriegova E, *et al.* Functional variant ANXA11 R230C:  
10  
11 true marker of protection and candidate disease modifier in sarcoidosis. *Genes*  
12  
13 *Immun* 2011;12:490-4.  
14  
15  
16 22. Levin AM, Iannuzzi MC, Montgomery CG, *et al.* Association of ANXA11 genetic  
17  
18 variation with sarcoidosis in African Americans and European Americans.  
19  
20  
21 *Genes Immun* 2013;14:13-8.  
22  
23  
24 24. Tomas A, Moss SE. Calcium- and cell cycle-dependent association of annexin 11  
25  
26 with the nuclear envelope. *J Biol Chem* 2003;278:20210-6.  
27  
28  
29  
30  
31  
32  
33  
34  
35  
36  
37  
38  
39  
40  
41  
42  
43  
44  
45  
46  
47  
48  
49  
50  
51  
52  
53  
54  
55  
56  
57  
58  
59  
60

1  
2  
3  
4  
5  
6  
7  
8  
9  
10  
11  
12  
13  
14  
15  
16  
17  
18  
19  
20  
21  
22  
23  
24  
25  
26  
27  
28  
29  
30  
31  
32  
33  
34  
35  
36  
37  
38  
39  
40  
41  
42  
43  
44  
45  
46  
47  
48  
49  
50  
51  
52  
53  
54  
55  
56  
57  
58  
59  
60

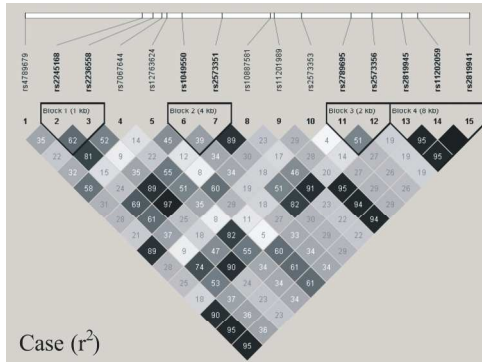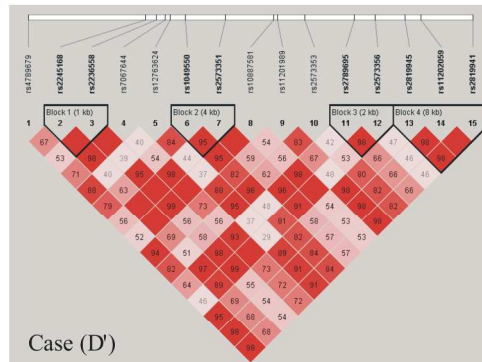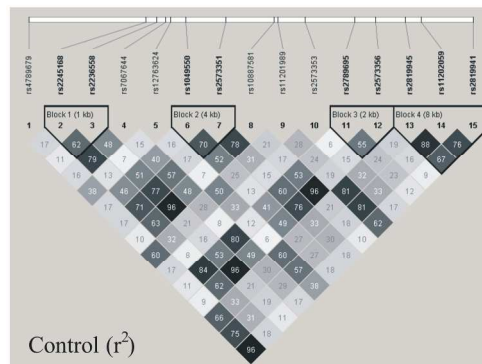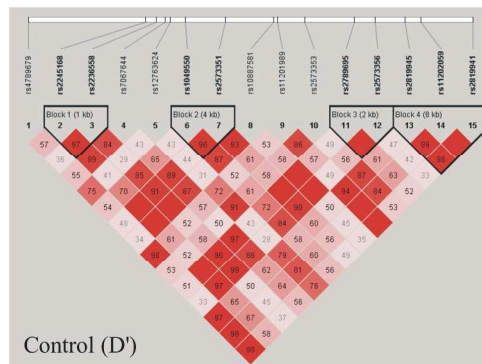

273x203mm (300 x 300 DPI)

Review only

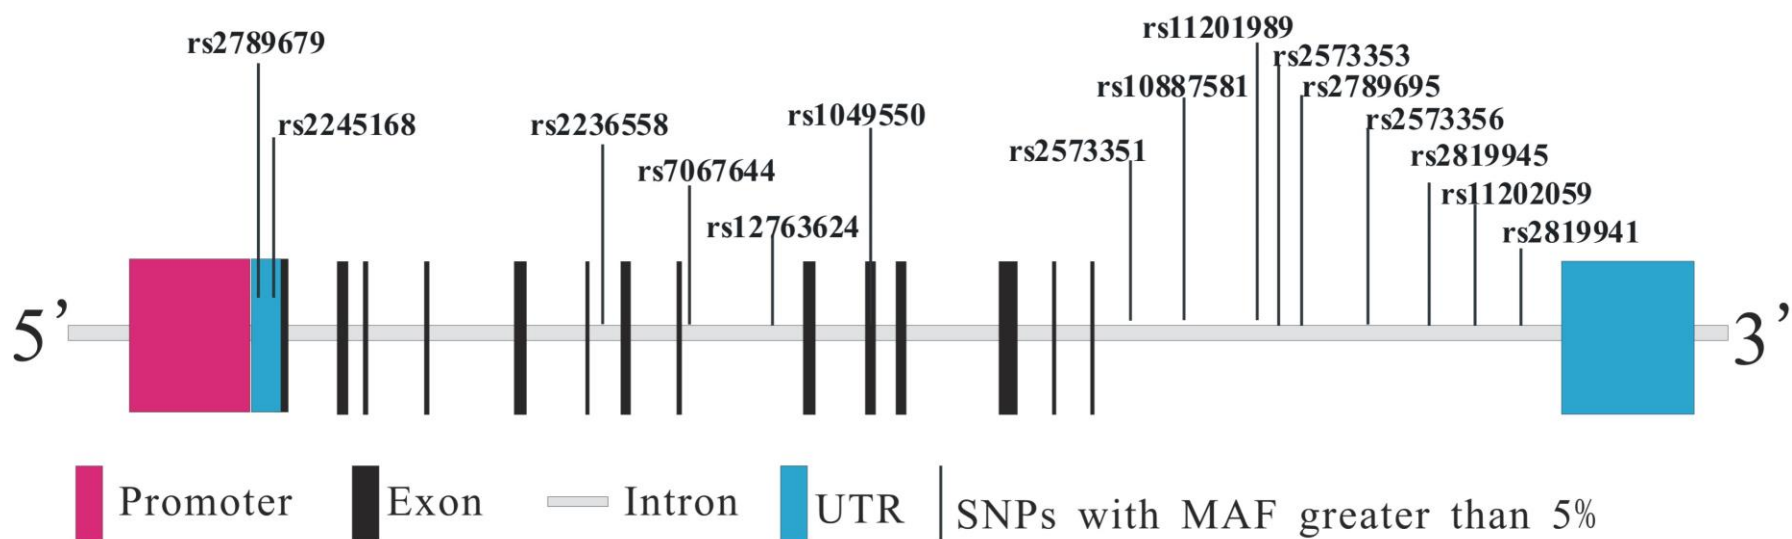

review only

1  
2  
3  
4  
5  
6  
7  
8  
9  
10  
11  
12  
13  
14  
15  
16  
17  
18  
19  
20  
21  
22  
23  
24  
25  
26  
27  
28  
29  
30  
31  
32  
33  
34  
35  
36  
37  
38  
39  
40  
41  
42  
43  
44  
45  
46  
47  
48  
49

1  
2  
3  
4  
5  
6  
7  
8  
9  
10  
11  
12  
13  
14  
15  
16  
17  
18  
19  
20  
21  
22  
23  
24  
25  
26  
27  
28  
29  
30  
31  
32  
33  
34  
35  
36  
37  
38  
39  
40  
41  
42  
43  
44  
45  
46  
47  
48  
49

**Supplemental table 1** Summary of all published sarcoidosis-association studies for ANXA11

| Study           | Population   |          | Type of Study | Sample Size (n) |         | Number of SNPs typed | Positive SNPs                   |
|-----------------|--------------|----------|---------------|-----------------|---------|----------------------|---------------------------------|
|                 | Ethnic group | Country  |               | Sarcoidosis     | Control |                      |                                 |
| Hofmann S, 2008 | Caucasian    | Germany  | Case-control  | 499             | 490     | GWAS                 | rs2789679, rs7091565, rs1049550 |
| Mrazek F, 2011  | Caucasian    | Czech    | Case-control  | 245             | 254     | 1                    | rs1049550                       |
| Cozier YC, 2012 | Caucasian    | America  | Case-control  | 486             | 943     | 10p12-10q22          | rs2789679, rs2819941            |
| Li Y, 2013      | Caucasian    | Germany  | Case-control  | 325             | 364     | 1                    | rs1049550                       |
| Levin AM, 2013  | Caucasian    | America  | Case-control  | 1689            | 1252    | 25                   | rs1049550                       |
| Morais A, 2013  | Caucasian    | Portugal | Case-control  | 208             | 197     | 1                    | rs1049550                       |

**Supplemental Table 2** Genotypic and allelic frequencies of ANXA11 polymorphisms in the controls and patients with sarcoidosis

| Variable     | Controls (n=418 ) |      | Sarcoidosis (n=412) |      | P-value <sup>a</sup> | OR, 95% CI      |
|--------------|-------------------|------|---------------------|------|----------------------|-----------------|
|              | No.               | %    | No.                 | %    |                      |                 |
| rs2245168    |                   |      |                     |      | 0.920                |                 |
| CC           | 156               | 37.3 | 150                 | 36.4 | 0.791                | 1.04, 0.74-1.38 |
| CT           | 200               | 47.9 | 197                 | 47.8 | 0.955                | 0.99, 0.76-1.30 |
| TT           | 62                | 14.8 | 65                  | 15.8 | 0.781                | 0.95, 0.65-1.39 |
| Per T allele | 324               | 38.8 | 327                 | 39.7 | 0.698                | 1.04, 0.85-1.27 |
| rs2236558    |                   |      |                     |      | 0.172                |                 |
| GG           | 118               | 28.2 | 104                 | 25.2 | 0.72                 | 1.06, 0.77-1.45 |
| TG           | 190               | 45.5 | 214                 | 51.9 | 0.060                | 0.77, 0.59-1.01 |
| TT           | 110               | 26.3 | 94                  | 22.8 | 0.073                | 1.33, 0.97-1.82 |
| Per T allele | 410               | 49.0 | 402                 | 48.8 | 0.917                | 0.99, 0.82-1.20 |
| rs7067644    |                   |      |                     |      | 0.173                |                 |
| AA           | 152               | 36.4 | 176                 | 42.7 | 0.059                | 0.76, 0.58-1.01 |
| GA           | 206               | 49.3 | 182                 | 44.2 | 0.137                | 1.23, 0.94-1.68 |
| GG           | 60                | 14.4 | 54                  | 13.1 | 0.597                | 1.11, 0.75-1.65 |
| Per G allele | 326               | 38.0 | 290                 | 35.2 | 0.109                | 0.85, 0.70-1.04 |
| rs12763624   |                   |      |                     |      | 0.118                |                 |
| TT           | 126               | 75.6 | 150                 | 36.4 | 0.008                | 0.68, 0.51-0.91 |
| CT           | 216               | 51.7 | 186                 | 45.2 | 0.059                | 1.30, 0.99-1.71 |
| CC           | 76                | 18.2 | 76                  | 18.5 | 0.411                | 1.16, 0.81-1.67 |
| Per C allele | 368               | 44.0 | 338                 | 41.0 | 0.216                | 0.88, 0.73-1.08 |
| rs2573351    |                   |      |                     |      | 0.437                |                 |

|    |              |     |      |     |      |       |                 |
|----|--------------|-----|------|-----|------|-------|-----------------|
| 1  |              |     |      |     |      |       |                 |
| 2  |              |     |      |     |      |       |                 |
| 3  |              |     |      |     |      |       |                 |
| 4  |              |     |      |     |      |       |                 |
| 5  |              |     |      |     |      |       |                 |
| 6  |              |     |      |     |      |       |                 |
| 7  | TT           | 120 | 28.7 | 104 | 25.2 | 0.263 | 1.19, 0.88-1.62 |
| 8  | CT           | 202 | 48.3 | 216 | 52.4 | 0.238 | 0.85, 0.65-1.12 |
| 9  | CC           | 96  | 23.0 | 92  | 22.3 | 0.826 | 1.04, 0.75-1.44 |
| 10 | Per C allele | 394 | 47.1 | 400 | 48.5 | 0.564 | 1.06, 0.87-1.28 |
| 11 | rs10887581   |     |      |     |      | 0.290 |                 |
| 12 | TT           | 114 | 27.3 | 96  | 23.3 | 0.190 | 1.23, 0.90-1.69 |
| 13 | TC           | 190 | 45.5 | 208 | 50.5 | 0.148 | 0.82, 0.62-1.07 |
| 14 | CC           | 114 | 27.3 | 108 | 26.2 | 0.729 | 1.06, 0.78-1.44 |
| 15 | Per C allele | 418 | 50.0 | 424 | 51.5 | 0.583 | 1.06, 0.87-1.29 |
| 16 | rs11201989   |     |      |     |      | 0.144 |                 |
| 17 | GG           | 130 | 31.1 | 128 | 31.1 | 0.995 | 1.00, 0.75-1.34 |
| 18 | GC           | 218 | 52.2 | 194 | 47.1 | 0.141 | 1.23, 0.93-1.62 |
| 19 | CC           | 70  | 16.8 | 90  | 21.9 | 0.060 | 0.71, 0.50-1.01 |
| 20 | Per C allele | 358 | 42.8 | 374 | 45.4 | 0.29  | 1.11, 0.91-1.35 |
| 21 | rs2573353    |     |      |     |      | 0.918 |                 |
| 22 | CC           | 178 | 42.6 | 176 | 42.7 | 0.957 | 0.99, 0.75-1.31 |
| 23 | CA           | 196 | 46.9 | 192 | 46.6 | 0.921 | 1.01, 0.77-1.33 |
| 24 | AA           | 44  | 10.5 | 44  | 10.7 | 0.941 | 0.98, 0.63-1.53 |
| 25 | Per A allele | 284 | 34.0 | 280 | 34.0 | 0.997 | 1.00, 0.82-1.23 |
| 26 | rs2789695    |     |      |     |      | 0.918 |                 |
| 27 | TT           | 178 | 42.6 | 180 | 34.0 | 0.740 | 0.95, 0.73-1.26 |
| 28 | CT           | 188 | 45.0 | 184 | 44.7 | 0.920 | 1.01, 0.77-1.33 |
| 29 | CC           | 52  | 12.4 | 48  | 11.7 | 0.73  | 1.08, 0.71-1.64 |
| 30 | Per C allele | 292 | 34.9 | 280 | 34.0 | 0.69  | 0.96, 0.78-1.17 |
| 31 | rs2573356    |     |      |     |      | 0.892 |                 |
| 32 | CC           | 118 | 28.2 | 112 | 27.2 | 0.742 | 1.05, 0.78-1.43 |
| 33 |              |     |      |     |      |       |                 |
| 34 |              |     |      |     |      |       |                 |
| 35 |              |     |      |     |      |       |                 |
| 36 |              |     |      |     |      |       |                 |
| 37 |              |     |      |     |      |       |                 |
| 38 |              |     |      |     |      |       |                 |
| 39 |              |     |      |     |      |       |                 |
| 40 |              |     |      |     |      |       |                 |
| 41 |              |     |      |     |      |       |                 |
| 42 |              |     |      |     |      |       |                 |
| 43 |              |     |      |     |      |       |                 |
| 44 |              |     |      |     |      |       |                 |
| 45 |              |     |      |     |      |       |                 |
| 46 |              |     |      |     |      |       |                 |
| 47 |              |     |      |     |      |       |                 |
| 48 |              |     |      |     |      |       |                 |
| 49 |              |     |      |     |      |       |                 |

|              |     |      |     |      |       |                 |
|--------------|-----|------|-----|------|-------|-----------------|
| CT           | 190 | 45.5 | 194 | 47.1 | 0.639 | 0.94, 0.71-1.23 |
| TT           | 110 | 26.3 | 106 | 25.7 | 0.843 | 1.03, 0.76-1.41 |
| Per T allele | 410 | 49.0 | 406 | 49.3 | 0.926 | 0.99, 0.82-1.20 |
| rs2819945    |     |      |     |      | 0.101 |                 |
| GG           | 119 | 28.5 | 130 | 31.6 | 0.294 | 0.85, 0.63-1.15 |
| GA           | 221 | 52.9 | 188 | 45.6 | 0.030 | 1.35, 1.03-1.78 |
| AA           | 78  | 18.7 | 94  | 22.8 | 0.138 | 0.78, 0.55-1.09 |
| Per A allele | 377 | 45.1 | 376 | 45.6 | 0.827 | 1.02, 0.84-1.24 |
| rs11202059   |     |      |     |      | 0.064 |                 |
| GG           | 106 | 25.4 | 128 | 31.1 | 0.067 | 0.75, 0.56-1.02 |
| GA           | 226 | 54.1 | 190 | 46.1 | 0.021 | 1.38, 1.05-1.81 |
| AA           | 86  | 20.6 | 94  | 22.8 | 0.429 | 0.88, 0.63-1.22 |
| Per A allele | 398 | 47.6 | 378 | 45.9 | 0.479 | 0.93, 0.77-1.13 |

<sup>a</sup> *P*-value was calculated by 2×3 and 2×2 chi-squared tests based on codominant, dominant for the rare allele, heterosis and recessive for the rare allele models of inheritance.

Alpha value is adjusted by Bonferroni correction and statistically significant results ( $P < 0.003$ )

**Supplementary table 3** Multi-SNP analysis of rs2789679, rs1049550 and rs2819941

| Models                                | testing SNP  | P-value | OR   | 95%CI     |
|---------------------------------------|--------------|---------|------|-----------|
| model1: rs2789679+ rs1049550          | rs2789679: A | 0.11    | 1.19 | 0.96-1.48 |
| model2: rs2819941+rs1049550           | rs2819941: T | 0.169   | 1.17 | 0.94-1.45 |
| model3: rs2789679+rs1049550+rs2819941 | rs1049550: T | 0.0002  | 0.65 | 0.52-0.82 |

For peer review only



# BMJ Open

## Annexin A11 (ANXA11) gene polymorphisms are associated with sarcoidosis in a Han Chinese population - a case-control study

|                                 |                                                                                                                                                                                                                                                                                                                                                                                                                                                                                                                                                                                    |
|---------------------------------|------------------------------------------------------------------------------------------------------------------------------------------------------------------------------------------------------------------------------------------------------------------------------------------------------------------------------------------------------------------------------------------------------------------------------------------------------------------------------------------------------------------------------------------------------------------------------------|
| Journal:                        | <i>BMJ Open</i>                                                                                                                                                                                                                                                                                                                                                                                                                                                                                                                                                                    |
| Manuscript ID:                  | bmjopen-2013-004466.R4                                                                                                                                                                                                                                                                                                                                                                                                                                                                                                                                                             |
| Article Type:                   | Research                                                                                                                                                                                                                                                                                                                                                                                                                                                                                                                                                                           |
| Date Submitted by the Author:   | 19-Jun-2014                                                                                                                                                                                                                                                                                                                                                                                                                                                                                                                                                                        |
| Complete List of Authors:       | Zhang, LG; the First Hospital Affiliated to the Xinxiang Medical College, The Third Department of Tuberculosis<br>Xiao, ZJ; the First Hospital Affiliated to the Xinxiang Medical College, The Third Department of Tuberculosis<br>Shi, GC; the First Hospital Affiliated to the Xinxiang Medical College, The Third Department of Tuberculosis<br>J, Huang; the First Hospital Affiliated to the Xinxiang Medical College, The Third Department of Tuberculosis<br>Zhang, CX; the First Hospital Affiliated to the Xinxiang Medical College, The Third Department of Tuberculosis |
| <b>Primary Subject Heading</b>: | Infectious diseases                                                                                                                                                                                                                                                                                                                                                                                                                                                                                                                                                                |
| Secondary Subject Heading:      | Genetics and genomics                                                                                                                                                                                                                                                                                                                                                                                                                                                                                                                                                              |
| Keywords:                       | GENETICS, IMMUNOLOGY, INFECTIOUS DISEASES                                                                                                                                                                                                                                                                                                                                                                                                                                                                                                                                          |
|                                 |                                                                                                                                                                                                                                                                                                                                                                                                                                                                                                                                                                                    |

SCHOLARONE™  
Manuscripts

only

1  
2  
3  
4 1 **Annexin A11 (ANXA11) gene polymorphisms are associated with sarcoidosis in a**  
5  
6 2 **Han Chinese population - a case-control study**

7  
8  
9 3 LG Zhang, ZJ Xiao\*, GC Shi, J Huang, CX Zhang

10  
11 4 The Third Department of Tuberculosis, the First Hospital Affiliated to the Xinxiang  
12  
13 5 Medical College, Xinxiang, Henan, PR China

14  
15  
16 6 \*Corresponding author: Zhijian Xiao, The Third Department of Tuberculosis, the First  
17  
18 7 Hospital Affiliated to the Xinxiang Medical College, Xinxiang, Henan, PR China.

19  
20  
21 8 No.88 Jiankang Road, Weihui City, Henan, 463000, PR China

22  
23  
24 9 E-mail: zhangligongys@163.com

25  
26 10 Tel: +86 0373 - 4402229 (office)

27  
28  
29 11 Fax: +86 0373 -4402251

30  
31 12 **Key words:** Sarcoidosis; Annexin A11; Single-nucleotide polymorphism

32  
33  
34 13 Word count: 3918

35  
36  
37 14

1 **Abstract**

2 **Objectives:** To further identify the single-nucleotide polymorphisms (SNPs) that  
3 contribute to the genetic susceptibility to sarcoidosis, we examined the potential  
4 association between sarcoidosis and fifteen SNPs of the ANXA11 gene.

5 **Design:** A case - control study.

6 **Setting:** A tuberculosis unit in a hospital of the university in China.

7 **Participants:** Participants included 412 patients with sarcoidosis and 418 healthy  
8 controls.

9 **Methods:** The selected SNPs were genotyped using the MALDI-TOF in the  
10 MassARRAY system.

11 **Results:** The statistical significant differences were found in the allelic or genotypic  
12 frequencies of the rs2789679, rs1049550 and rs2819941 in the ANXA11 gene  
13 between the patients with sarcoidosis and the controls. The rs2789679 A allele ( $P =$   
14  $0.00004$ , OR = 1.42, 95%CI = 1.17-1.73) and rs2819941 T allele ( $P = 0.0006$ , OR =  
15 1.41, 95%CI = 1.16-1.71) were significantly more frequent in the patients with  
16 sarcoidosis compared to controls. The frequency of the rs1049550 T allele ( $P =$   
17  $0.000002$ , OR = 0.61, 95%CI= 0.49 - 0.74) in the patients with sarcoidosis was  
18 significantly lower than that in the controls. The multi-SNP model reveals that  
19 rs1049550 is the only independent SNP association effect after accounting for the  
20 other two marginally associated SNPs. In block 2 (rs1049550-rs2573351), the T - C  
21 haplotype occurred significantly less frequently ( $P = 0.001$ ), whereas the C - C  
22 haplotypes occurred more frequently ( $P = 0.0001$ ) in the patients with sarcoidosis

1  
2  
3  
4 1 than the controls. Furthermore, genotype frequency distribution revealed that, in  
5  
6 2 rs1049550, CC genotype was significantly more in the patients with chest  
7  
8 3 radiographic (CXR) stage I sarcoidosis than the patients with CXR stage II-IV  
9  
10 4 sarcoidosis ( $P = 0.012$ ).

11  
12  
13 5 **Conclusions:** These findings point to a role for the polymorphisms of ANXA11 in  
14  
15 6 sarcoidosis in a Chinese Han population, and may be informative for future genetic  
16  
17 7 studies on sarcoidosis.  
18  
19  
20

21 8  
22  
23  
24  
25  
26  
27  
28  
29  
30  
31  
32  
33  
34  
35  
36  
37  
38  
39  
40  
41  
42  
43  
44  
45  
46  
47  
48  
49  
50  
51  
52  
53  
54  
55  
56  
57  
58  
59  
60

1  
2  
3  
4 **1 Article summary**

5  
6 **2 Article focus**

7  
8  
9 3 1. The first genome-wide association study (GWAS) in sarcoidosis conducted in a  
10  
11 4 German population has revealed that the rs1049550 (C > T, Arg230Cys) located in  
12  
13 5 exon 10 were associated with sarcoidosis.

14  
15  
16 6 2. Whether these SNPs modulate the risk of sarcoidosis by themselves or whether  
17  
18 7 they correlate with other causative SNPs and are repeated in other populations remain  
19  
20 8 unclear.

21  
22 9 3. We hypothesize that common variants in the ANXA11 gene may significantly  
23  
24 10 contribute to the predisposition to develop sarcoidosis in a Chinese Han population.

25  
26  
27  
28  
29 **11 Key messages**

30  
31 12 1. ANXA11 rs2789679 (3'-UTR) was significantly associated with sarcoidosis.

32  
33 13 2. ANXA11 rs1049550 (exon 10) was significantly associated with sarcoidosis.

34  
35 14 3. Another significant association was observed for rs2819941 (intron 14).

36  
37  
38  
39 **15 Strengths and limitations of this study**

40  
41 16 1. A systematical screening of the functional SNPs in the promoter region, 5'- and  
42  
43 17 3'-UTR, exons of the ANXA11 gene, and the homogeneity of the study subjects  
44  
45 18 representing the Chinese Han are the main strengths of this study.

46  
47  
48 19 2. The lack of data proving the positive association observed for rs2789679 and  
49  
50 20 rs1049550 is a potential limitation of this study. Furthermore, the association of the  
51  
52 21 serum level of ANXA11 with sarcoidosis still needs to be investigated.

53  
54  
55  
56  
57  
58  
59  
60 22

## 1 INTRODUCTION

2 Sarcoidosis is a systemic autoimmune disease characterized by destructive,  
3 non-caseating epithelioid granulomatous lesions, with accumulated phagocytes and  
4 activated CD4<sup>+</sup> T helper type 1 lymphocytes <sup>1 2</sup>. The typical manifestations of  
5 sarcoidosis include bilateral hilar lymphadenopathy, pulmonary infiltration and ocular  
6 and skin lesions. The clinical course and prognosis of sarcoidosis are variable. The  
7 acute forms of sarcoidosis such as Löfgren's syndrome (LS) can resolve  
8 spontaneously in most cases. However, chronic pulmonary sarcoidosis may progress  
9 to lung fibrosis which eventually causes respiratory failure. Recent studies have  
10 demonstrated that sarcoidosis can occur in a pattern of family clustering, and its racial  
11 incidence is also different, suggesting that some genetic factors may contribute to the  
12 risk and severity of sarcoidosis <sup>1 3</sup>.

13 The Annexin gene family is involved in the etiology of several autoimmune and  
14 chronic diseases <sup>4 5</sup>. One member of the Annexin gene family, ANXA11, located on  
15 chromosome 10q22.3, is involved in calcium signaling, apoptosis, vesicle trafficking,  
16 cell growth and terminal phase of cell division <sup>5-7</sup>. In this context, the development  
17 and maintenance of the granulomatous inflammation in sarcoidosis have been  
18 repeatedly associated with the impaired apoptosis of activated inflammatory cells <sup>8 9</sup>.  
19 Most of the early-stage sarcoidosis is characterized by mononuclear cell alveolitis  
20 dominated by activated CD4<sup>+</sup> T cells and macrophages. Between these cells, the  
21 uncoordinated interplay results in the formation of typical non-caseating granulomas.  
22 The mechanism by which the granulomas resolve has not been fully elucidated.

1  
2  
3  
4 1 However, it is generally assumed that the induction of apoptosis and/or by the  
5  
6 2 withdrawal of inflammatory cytokines participates in the disappearance of  
7  
8 3 granulomas<sup>10 11</sup>. In the patients with sarcoidosis, their peripheral blood monocytes  
9  
10 4 were characterized by apoptosis<sup>9</sup>.

11  
12  
13  
14 5 In previous studies, case - control/family ‘hypothesis - driven’ studies and low  
15  
16 6 density linkage scans were used to identify genetic factors conferring the genetic  
17  
18 7 susceptibility to sarcoidosis<sup>12</sup>. Notably, the first genome - wide association study  
19  
20 8 (GWAS) in sarcoidosis conducted in a German population has recently revealed an  
21  
22 9 association: the leading rs2789679 SNP (single - nucleotide polymorphism) located in  
23  
24 10 the 3’-untranslated region (3’-UTR) and a common nonsynonymous SNP (rs1049550,  
25  
26 11 C > T, Arg230Cys) were associated with the increased risk of sarcoidosis<sup>4 13</sup>. This  
27  
28 12 association has recently been supported by another report from the same population<sup>14</sup>.  
29  
30 13 Thus, more studies should be performed to demonstrate the following items: whether  
31  
32 14 these SNPs modulate the risk of sarcoidosis by themselves or whether they correlate  
33  
34 15 with other causative SNPs and are repeated in other populations. The published  
35  
36 16 studies about the association of sarcoidosis and ANXA11 are summarized in  
37  
38 17 Supplemental table 1. We hypothesize that common variants in the ANXA11 gene  
39  
40 18 may significantly contribute to the predisposition to develop sarcoidosis.  
41  
42  
43  
44  
45  
46  
47  
48

49 19 In this study, we investigated fifteen loci in a Chinese population from He’nan  
50  
51 20 province (China) to verify the putative association between ANXA11 polymorphisms  
52  
53 21 and sarcoidosis.  
54  
55

## 56 22 **SUBJECTS AND METHODS**

57  
58  
59  
60

## 1 **Subjects**

2 Four hundred and twelve patients with sarcoidosis (mean  $\pm$  SD age:  $53.6 \pm 4.6$   
3 years; 155 men and 257 women) were recruited from our hospital between May 2005  
4 and March 2013. Sarcoidosis was diagnosed by the evidence of non-caseating  
5 epitheloid cell granuloma in biopsy specimens and chest radiographic abnormalities.  
6 Chronic sarcoidosis was defined as a disease over at least 2 years or at least two  
7 episodes in a lifetime. A cute sarcoidosis was defined as one episode of acute  
8 sarcoidosis which had totally resolved at the date of the examination. The control  
9 group consisted of 418 unrelated healthy subjects (mean  $\pm$  SD age:  $54.2 \pm 5.3$  years;  
10 160 men and 258 women) who underwent health examinations in the Medical  
11 Examination Center of the First Affiliated Hospital of the Xinxiang Medical College  
12 (Xinxiang, China) between Oct 2009 and Sept 2013. None of the individuals in the  
13 control group had a history of lung diseases or showed any symptoms of the lung or  
14 other diseases by chest radiography or laboratory blood tests. Participants were  
15 excluded if they: were taking other prescribed medications that could affect the  
16 central nervous system; had a history of seizures, hematological diseases, or severe  
17 liver or kidney impairment; or were pregnant. No familial relationship was known  
18 between the study participants. The study was performed according to the Guidelines  
19 of the Medical Ethical Committee of Xinxiang Medical College (Xinxiang, China).  
20 Written informed consent was obtained from each participant in this study.

## 21 **SNP selection**



1 Tagging SNPs were selected from the catalogs of the International HapMap  
2 Project. The rs2789679 and rs2245168 are located in 5'-UTR, rs2236558 in intron 6,  
3 rs7067644 and rs12763624 in intron 8, rs1049550 in exon 10, rs2573351 in intron 13,  
4 rs10887581, rs11201989, rs2573353, rs2789695, rs2573356, rs2819945, rs11202059  
5 and rs2819941 in intron 14 (Supplemental figure 1). Marker selection was based on  
6 the following criteria. (a) We used the CHB data from the HapMap (release 27) to  
7 select tagSNPs for ANXA11. (b) We restricted our search for tagSNPs from base pair  
8 80155124 to 80205677. (c) Further, we limited the SNPs to tag to those with a minor  
9 allele frequency  $\geq 0.2$  in the CHB. (d) Based on these restrictions, there were a total  
10 of 29 SNPs. (e) Using HAPLOVIEW with an  $r^2$  threshold  $\geq 0.8$ , 15 tagSNP were  
11 selected and used for subsequent analyses.

## 12 Genotyping

13 Peripheral blood was collected from a vein into a sterile tube coated with  
14 ethylenediamine tetraacetic acid (EDTA). Plasma samples were stored at  $-20^{\circ}\text{C}$ .  
15 Genomic DNA was extracted from the frozen peripheral blood samples using a  
16 QIAmp Blood Mini Kit (Qiagen Inc., Valencia, CA, USA) according to the  
17 manufacturer's protocols. The selected SNPs were genotyped in cases and controls by  
18 using the MALDI-TOF in the MassARRAY system (Sequenom Inc., San Diego, CA,  
19 USA). Probes and primers were designed using the Assay Design Software  
20 (Sequenom, San Diego, CA, USA). The completed genotyping reactions were spotted  
21 onto a 384 well spectroCHIP (Sequenom) using the MassARRAY Nanodispenser  
22 (Sequenom) and determined by the matrix - assisted laser desorption ionization time -

1 of - flight mass spectrometer. Genotype calling was performed in realtime with the  
2  
3  
4  
5  
6  
7  
8  
9  
10  
11  
12  
13  
14  
15  
16  
17  
18  
19  
20  
21  
22  
23  
24  
25  
26  
27  
28  
29  
30  
31  
32  
33  
34  
35  
36  
37  
38  
39  
40  
41  
42  
43  
44  
45  
46  
47  
48  
49  
50  
51  
52  
53  
54  
55  
56  
57  
58  
59  
60

1 of - flight mass spectrometer. Genotype calling was performed in realtime with the  
2  
3  
4  
5  
6  
7  
8  
9  
10  
11  
12  
13  
14  
15  
16  
17  
18  
19  
20  
21  
22  
23  
24  
25  
26  
27  
28  
29  
30  
31  
32  
33  
34  
35  
36  
37  
38  
39  
40  
41  
42  
43  
44  
45  
46  
47  
48  
49  
50  
51  
52  
53  
54  
55  
56  
57  
58  
59  
60

#### 4 **Statistical analysis**

5 All data were analyzed using the SPSS 17.0 software (SPSS Inc., Chicago, IL,  
6 USA). Hardy-Weinberg equilibrium was evaluated by Chi-square tests. Differences  
7 between the cases and controls in the frequency of the alleles, genotypes and  
8 haplotypes were evaluated by the Fisher's exact test or the Pearson Chi-square test.  
9 Unconditional logistic regression was used to calculate the odds ratio (OR) and 95%  
10 confidence interval (CI) in independent association between each locus and the  
11 presence of sarcoidosis. Gender and age of subjects were treated as covariants in  
12 binary logistic regression. *P* values were calculated based on codominant, dominant  
13 for the rare allele, heterosis and recessive for the rare allele models of inheritance.  
14 Models of multiple logistic regression were used to test the independence of  
15 individual allelic effect. In detail, the most significant SNP was chosen to be the  
16 conditional SNP (covariate in the regression model) when testing other significant  
17 SNPs; Meanwhile, a multi-SNP model including all significant SNPs was also  
18 performed. The Bonferroni correction was used to adjust the test level when multiple  
19 comparisons were conducted, and the *P* value was divided by the total number of loci.  
20 Haplotype blocks were defined according to the criteria developed by Gabriel et al.<sup>15</sup>.  
21 Pair-wise LD statistics ( $D'$  and  $r^2$ ) and haplotype frequency were calculated, and  
22 haplotype blocks were constructed using the Haploview 4.0<sup>16</sup>. To ensure that the LD

1 blocks most closely reflect the population level LD patterns, definition of the blocks  
2 were based on the control samples alone. The haplotype frequencies were estimated  
3 using GENECOUNTING, which computes maximum - likelihood estimates of  
4 haplotype frequencies from unknown phase data by utilizing an expectation -  
5 maximization algorithm<sup>17-20</sup>. The significance of any haplotypic association was  
6 evaluated using a likelihood ratio test, followed by permutation testing that compared  
7 estimated haplotype frequencies in cases and controls<sup>17 19</sup>.

## 8 RESULTS

9 The genotype distribution of the fifteen polymorphisms was consistent with the  
10 Hardy-Weinberg equilibrium ( $P > 0.05$ ). The analysis of strong LD in the patients  
11 with sarcoidosis and healthy controls revealed that 2 SNPs (rs2245168, rs2236558), 2  
12 SNPs (rs1049550, rs2573351), 2 SNPs (rs2789695, rs2573356) and 3 SNPs  
13 (rs2819945, rs11202059, rs2819941) were located in haplotype block 1, block 2,  
14 block 3 and block 4 ( $D' > 0.9$ , Fig. 1). The genotype distribution, allelic frequencies,  
15 and haplotypes in the patients with sarcoidosis and healthy controls are showed in  
16 Tables 1-3 and Supplemental table 2

17 Comparison of genotype and allele frequency distribution revealed significant  
18 differences between the patients with sarcoidosis and healthy controls for 3 SNPs:  
19 rs2789679, rs1049550 and rs2819941. The frequency of the rs1049550 T allele ( $P =$   
20 0.000002, OR = 0.61, 95%CI= 0.49-0.74) in the patients with sarcoidosis was  
21 significantly lower than that in the controls. These differences remained statistically  
22 significant after Bonferroni corrections. The rs1049550 was the most significant of the

1  
2  
3  
4 1 three. A multi-SNP model revealed rs1049550 to be the only significant independent  
5  
6 2 SNP association with sarcoidosis risk.  
7

8  
9 3 The multi-SNP model showed only rs1049550 present a significant effect on the  
10  
11 4 disease phenotype ( $p < 0.001$ ). No independent effect was found for rs2789679 or  
12  
13 5 rs2819941 when adjusting for the effect of rs1049550. Both individual SNP and multi -  
14  
15 6 SNP analysis supported rs1049550: T allele was an important protective factor for  
16  
17 7 affecting sarcoidosis (odds ratio around 0.6). In another word, carriers of rs1049550:  
18  
19 8 C allele have higher susceptibility to sarcoidosis in our Chinese Han population  
20  
21 9 (Supplemental table 3).  
22  
23  
24

25  
26 10 We performed an association analysis to determine whether the haplotype was  
27  
28 11 associated with the risk of sarcoidosis (Global  $P < 0.05$  in block 2 and block 3).  
29  
30 12 Compared with the controls, the T - C haplotype occurred significantly less frequently  
31  
32 13 ( $P = 0.001$ ) but the C - C haplotypes occurred more frequently ( $P = 0.0001$ ) in block 2  
33  
34 14 (rs1049550 - rs2573351) in the patients with sarcoidosis.  
35  
36  
37  
38

39 15 To assess particular disease phenotypes, the patients with sarcoidosis were  
40  
41 16 divided into the subgroups according to their chest radiographic (CXR) stage. CXR  
42  
43 17 stage I (isolated bilateral hilar lymphadenopathy):  $N = 196$ ; CXR stages II - IV  
44  
45 18 (infiltration of parenchyma): 167; CXR stage 0 (absence on pulmonary disease):  $N =$   
46  
47 19 28; the information on CXR stage was not available for 21 patients. Genotype  
48  
49 20 frequency distribution revealed that, in rs1049550, CC genotype was significantly  
50  
51 21 more in the patients with chest radiographic (CXR) stage I sarcoidosis than the  
52  
53 22 patients with CXR stage II-IV sarcoidosis ( $P = 0.012$ ). (Table 4).  
54  
55  
56  
57  
58  
59  
60

## 1 DISCUSSION

2 A key step in linkage and association studies is to identify common risk variants  
3 in different populations. To determine if common risk variants exist in distinct  
4 populations, fifteen SNPs which span approximately 0.53 Mb of the ANXA11 gene,  
5 were genotyped in samples from the patients with sarcoidosis and healthy controls in  
6 a Chinese Han population. Recently, new sarcoidosis loci have been identified by  
7 genome-wide association studies<sup>4 14</sup>. With the fast development of genome - wide  
8 association studies, an increasing number of susceptibility loci for sarcoidosis have  
9 been found in different populations<sup>4 14 21</sup>. However, these observations should be  
10 confirmed in other genetically independent populations. In this study, we conducted  
11 the first large genetic association study of the ANXA11 gene in a Chinese Han  
12 population. The evidence of markers associated with sarcoidosis was presented, and  
13 these markers were mapped to different locations in the ANXA11 gene (81897864 -  
14 81951001). The association signals in the region were identified, and some  
15 significantly associated haplotypes also appeared this region.

16 Hoffman et al. reported an association between the T allele of the non -  
17 synonymous SNP rs1049550 and significantly decreased risk of sarcoidosis in a  
18 German population<sup>4</sup>. Similar results were also obtained in other two European  
19 populations<sup>14 21</sup>. As a part of the sarcoidosis GWAS done in Americans<sup>22</sup>, we further  
20 confirmed this association in a Chinese Han population. In this study, the frequency of  
21 ANXA11 rs1049550 T allele was significantly lower in the patients with sarcoidosis  
22 than the healthy controls. Genotype frequency distribution revealed that, in rs1049550,

1  
2  
3  
4 1 CC genotype was significantly more in the patients with stage I sarcoidosis than the  
5  
6 2 patients with stage II-IV sarcoidosis. The “protective” effect of ANXA11 T allele  
7  
8  
9 3 increased with the number of its copies in the genotype, which is consistent with the  
10  
11 4 result obtained in the patients with sarcoidosis in a German population <sup>4</sup>, Furthermore,  
12  
13  
14 5 the T allele carriers among the patients were protected from infiltration of lung  
15  
16 6 parenchyma (radiographic stages II-IV) <sup>21</sup>. We have also demonstrated that rs1049550  
17  
18  
19 7 is significant cross - ethnically at the gene level after adjustment for the single SNP  
20  
21 8 association tests performed. The mechanism by which rs1049550 affects the  
22  
23  
24 9 susceptibility to sarcoidosis is that the SNP may affect the function of the ANXA11  
25  
26 10 protein rather than affect its expression. In humans, the ANXA11 protein consists of  
27  
28  
29 11 an N - terminalproline - tyrosine - glycine (PYG) - rich region, followed by four  
30  
31 12 annexin core domains. The rs1049550 leads to an amino - acid exchange (basic  
32  
33  
34 13 arginine to a polar cysteine) at the evolutionarily conserved position 230 (R230C) in  
35  
36 14 the first annexin domain, which is responsible for Ca<sup>2+</sup> - dependent trafficking of the  
37  
38  
39 15 protein in the cell <sup>23</sup>.

40  
41 16 In the GWAS conducted by Hofmann et al <sup>4</sup>, the strongest association signal was  
42  
43  
44 17 observed for rs2789679. This marker is located in the 3'-UTR of the ANXA11 gene.  
45  
46 18 The T allele had a frequency of 35% among the patients with sarcoidosis and 44% in  
47  
48  
49 19 the healthy controls, with 13% of the patients with sarcoidosis and 19% of controls  
50  
51 20 being TT homozygous. Fine-mapping in the Black Women's Health Study (BWHS)  
52  
53  
54 21 revealed rs2819941 to be the top SNP, associated with a non-significant ( $P = 0.06$ )  
55  
56 22 reduction in the risk of sarcoidosis (17% reduction per copy of the C-allele). In this  
57  
58  
59  
60

1  
2  
3  
4 1 case-control association study, the frequency of the A allele in rs2789679 and the  
5  
6 2 rs2819941 T allele frequency in the patients with sarcoidosis was significantly higher  
7  
8  
9 3 than that in the healthy controls. Several lines of evidence suggest that the observed  
10  
11 4 association is unlikely to be an artifact. First, both the single-SNP and the  
12  
13 5 haplotype-based association analyses support the current finding. Second, our samples  
14  
15 6 were from the same geographical region, excluding the. Finally, consistent results  
16  
17 7 were obtained from two genetically independent populations (Chinese Han and  
18  
19 8 Europeans). Collectively, our results confirmed the strong association between  
20  
21 9 ANXA11 polymorphisms and sarcoidosis, suggesting that ANXA11 represents a  
22  
23 10 strong genetic risk factor for sarcoidosis. Since causal SNP in ANXA11 was not  
24  
25 11 known, all the SNPs significantly associated with sarcoidosis were actually indirect  
26  
27 12 association through the real causal one. Though rs2789679 and rs2819941 were not in  
28  
29 13 LD with rs1049550, it may not tag the causal SNP as well as rs1049550. Hence, their  
30  
31 14 individual effects were eliminated when controlling for the effect of rs1049550.

32  
33  
34  
35  
36  
37  
38  
39 15 We further investigated the interaction among polymorphisms and observed  
40  
41 16 strong LD. The haplotype analysis revealed that significantly more C - C (block 2,  
42  
43 17 rs1049550 - rs2573351) and significantly fewer T - C haplotypes (block 2) were  
44  
45 18 found in the patients with sarcoidosis. These results indicated that the patients with C  
46  
47 19 - C (block 2) haplotypes of the ANXA11 gene were more prone to sarcoidosis.  
48  
49 20 Significantly higher frequencies of T - C haplotypes were detected in the healthy  
50  
51 21 controls than in the patients with sarcoidosis, suggesting that they may show  
52  
53 22 protective effects against sarcoidosis. Our sample size can detect SNP and haplotype  
54  
55  
56  
57  
58  
59  
60

1  
2  
3  
4 1 associations with 90% and 85% power, respectively, at a false positive rate of 5%,  
5  
6 2 disease prevalence of 1%, disease allele / haplotype frequency of 0.05 / 0.03, and a  
7  
8  
9 3 presumed odds ratio (OR) of 1.5. To some extent, this finding further supports a role  
10  
11 4 of ANXA11 polymorphisms in sarcoidosis, while ethnic group difference may exist.

12  
13  
14 5 In conclusion, our study suggests a potential role of the ANXA11 SNPs and their  
15  
16 6 related haplotypes in the genetic susceptibility to sarcoidosis. Further studies are  
17  
18 7 needed to investigate how these SNPs affect the function of ANXA11. A broader  
19  
20 8 examination of the genetic variation in ANXA11 in the Han Chinese may reveal other  
21  
22 9 variants associated with disease risk.  
23  
24  
25  
26  
27  
28  
29  
30  
31  
32  
33  
34  
35  
36  
37  
38  
39  
40  
41  
42  
43  
44  
45  
46  
47  
48  
49  
50  
51  
52  
53  
54  
55  
56  
57  
58  
59  
60



1  
2  
3  
4 **Contributors**

5  
6 LG Zhang was involved in conception and design of the study, acquisition of  
7  
8 patient data, genotyping and drafted the paper. ZJ Xiao and GC Shi were involved in  
9  
10 design of the study, genotyping and interpretation of results. J Huang and CX Zhang  
11  
12 were involved in the design of the study, acquisition of patient data and interpretation  
13  
14 of result. All authors revised the draft paper.  
15  
16

17  
18  
19 **Funding**

20  
21 The project was supported by the Research and Development Foundation of  
22  
23 Science and Technology of Henan Province (2012k15).  
24  
25

26 **Competing interests**

27  
28  
29 None.

30  
31 **Patient consent**

32  
33  
34 Obtained.

35  
36 **Ethics approval**

37  
38  
39 Ethics approval was provided by the First Hospital Affiliated to the Xinxiang  
40  
41 Medical College.  
42  
43

44 **Provenance and peer review**

45  
46  
47 Not commissioned; externally peer reviewed.  
48

49 **Data sharing statement**

50  
51  
52 No additional data are available.  
53  
54  
55  
56  
57  
58  
59  
60

1  
2  
3  
4 **Reference**

- 5  
6 1. Iannuzzi MC, Rybicki BA, Teirstein AS. Sarcoidosis. *N Engl J Med* 2007;  
7  
8 357:2153-65.  
9  
10 2. Baughman RP, Lower EE, du Bois RM. Sarcoidosis. *Lancet* 2003;361:1111-8  
11  
12 3. Grunewald J. Review: role of genetics in susceptibility and outcome of sarcoidosis.  
13  
14 *Semin Respir Crit Care Med* 2010;31:380-9.  
15  
16 4. Hofmann S, Franke A, Fischer A, *et al.* Genome-wide association study identifies  
17  
18 ANXA11 as a new susceptibility locus for sarcoidosis. *Nat Genet*  
19  
20 2008;40:1103-6.  
21  
22 5. Gerke V, Moss SE. Annexins: from structure to function. *Physiol Rev*  
23  
24 2002;82:331-71.  
25  
26 6. Farnaes L, Ditzel HJ. Dissecting the cellular functions of annexin XI using  
27  
28 recombinant human annexin XI-specific autoantibodies cloned by phage  
29  
30 display. *J Biol Chem* 2003;278:33120-6.  
31  
32 7. Tomas A, Futter C, Moss SE. Annexin 11 is required for midbody formation and  
33  
34 completion of the terminal phase of cytokinesis. *J Cell Biol* 2004;165:813-22.  
35  
36 8. Petzmann S, Maercker C, Markert E, *et al.* Enhanced proliferation and decreased  
37  
38 apoptosis in lung lavage cells of sarcoidosis patients. *Sarcoidosis Vasc Diffuse*  
39  
40 *Lung Dis* 2006;23:190-200  
41  
42 9. Dubaniewicz A, Trzonkowski P, Dubaniewicz-Wybieralska M, *et al.* Comparative  
43  
44 analysis of mycobacterial heat shock proteins-induced apoptosis of peripheral  
45  
46 blood mononuclear cells in sarcoidosis and tuberculosis. *J Clin Immunol*  
47  
48  
49  
50  
51  
52  
53  
54  
55  
56  
57  
58  
59  
60

- 1  
2  
3  
4 1 2006;26:243-50.  
5  
6 2 10. Agostini C, Trentin L, Facco M, *et al.* Role of IL-15, IL-2, and their receptors in  
7  
8 3 the development of T cell alveolitis in pulmonary sarcoidosis. *J Immunol*  
9  
10 4 1996;157:910-8  
11  
12 5 11. Jullien D, Sieling PA, Uyemura K, *et al.* IL-15, an immunomodulator of T cell  
13  
14 6 responses in intracellular infection. *J Immunol* 1997;158:800-6  
15  
16 7 12. Muller-Quernheim J, Schurmann M, Hofmann S, *et al.* Genetics of sarcoidosis.  
17  
18 8 *Clin Chest Med* 2008;29:391-414.  
19  
20 9 13. Morais A, Lima B, Peixoto M, *et al.* Annexin A11 gene polymorphism (R230C  
21  
22 10 variant) and sarcoidosis in a Portuguese population. *Tissue antigens*  
23  
24 11 2013;82:186-91.  
25  
26 12 14. Li Y, Pabst S, Kubisch C, *et al.* First independent replication study confirms the  
27  
28 13 strong genetic association of ANXA11 with sarcoidosis. *Thorax*  
29  
30 14 2010;65:939-40.  
31  
32 15 15. Gabriel SB, Schaffner SF, Nguyen H, *et al.* The structure of haplotype blocks in  
33  
34 16 the human genome. *Science* 2002;296:2225-9.  
35  
36 17 16. Barrett JC, Fry B, Maller J, *et al.* Haploview: analysis and visualization of LD and  
37  
38 18 haplotype maps. *Bioinformatics* 2005;21:263-5.  
39  
40 19 17. Curtis D, Knight J, Sham PC. Program report: GENECOUNTING support  
41  
42 20 programs. *Ann Hum Genet* 2006;70:277-9.  
43  
44 21 18. Zhao JH, Curtis D, Sham PC. Model-free analysis and permutation tests for allelic  
45  
46 22 associations. *Hum Hered* 2000;50:133-9.  
47  
48  
49  
50  
51  
52  
53  
54  
55  
56  
57  
58  
59  
60

- 1  
2  
3  
4 19. Zhao JH, Lissarrague S, Essioux L, et al. GENECOUNTING: haplotype analysis  
5  
6 with missing genotypes. *Bioinformatics* 2002;18:1694-5  
7  
8  
9 20. Zhao JH, Sham PC. Generic number systems and haplotype analysis. *Comput*  
10  
11 *Methods Programs Biomed* 2003;70:1-9  
12  
13  
14 21. Mrazek F, Stahelova A, Kriegova E, et al. Functional variant ANXA11 R230C:  
15  
16 true marker of protection and candidate disease modifier in sarcoidosis. *Genes*  
17  
18 *Immun* 2011;12:490-4.  
19  
20  
21 22. Levin AM, Iannuzzi MC, Montgomery CG, et al. Association of ANXA11 genetic  
22  
23 variation with sarcoidosis in African Americans and European Americans.  
24  
25 *Genes Immun* 2013;14:13-8.  
26  
27  
28  
29 24. Tomas A, Moss SE. Calcium- and cell cycle-dependent association of annexin 11  
30  
31 with the nuclear envelope. *J Biol Chem* 2003;278:20210-6.  
32  
33  
34  
35  
36  
37  
38  
39  
40  
41  
42  
43  
44  
45  
46  
47  
48  
49  
50  
51  
52  
53  
54  
55  
56  
57  
58  
59  
60

1  
2  
3  
4  
5  
6  
7  
8  
9  
10  
11  
12  
13  
14  
15  
16  
17  
18  
19  
20  
21  
22  
23  
24  
25  
26  
27  
28  
29  
30  
31  
32  
33  
34  
35  
36  
37  
38  
39  
40  
41  
42  
43  
44  
45  
46  
47  
48  
49  
50  
51  
52  
53  
54  
55  
56  
57  
58  
59  
60

1 **Figure Legend**

2 **Fig. 1** The LD plot of the fifteen SNPs in the ANXA11 gene. Values in squares are the  
3 pair-wise calculation of  $r^2$  (left) or  $D'$  (right). Black squares indicate  $r^2 = 1$  (i.e. perfect  
4 LD between a pair of SNPs). Empty squares indicate  $D' = 1$  (i.e. complete LD  
5 between a pair of SNPs).

6 **Supplemental Fig. 1** The structure of the human ANXA11 gene and 15 SNPs located  
7 on the gene.

8

9

10

11

12

13

14

15

16

17

18

19

20

21

22

**Table 1** Genotypic and allelic frequencies of ANXA11 polymorphisms in the controls and patients with sarcoidosis

| Variable     | Controls (n=418 ) |      | Sarcoidosis (n=412) |      | P-value <sup>a</sup> | OR, 95% CI      |
|--------------|-------------------|------|---------------------|------|----------------------|-----------------|
|              | No.               | %    | No.                 | %    |                      |                 |
| rs2789679    |                   |      |                     |      | 0.0007               |                 |
| TT           | 114               | 27.3 | 94                  | 22.8 | 0.140                | 1.27, 0.93-1.74 |
| AT           | 225               | 53.8 | 186                 | 45.2 | 0.012                | 1.42, 1.08-1.87 |
| AA           | 79                | 18.9 | 132                 | 32.0 | 0.0002               | 0.49, 0.36-0.68 |
| Per A allele | 383               | 45.8 | 450                 | 54.6 | 0.00004              | 1.42, 1.17-1.73 |
| rs1049550    |                   |      |                     |      | 0.0002               |                 |
| CC           | 154               | 36.8 | 208                 | 50.5 | 0.0007               | 0.57, 0.43-0.75 |
| CT           | 190               | 45.5 | 170                 | 41.3 | 0.221                | 1.19, 0.90-1.56 |
| TT           | 74                | 17.7 | 34                  | 8.3  | 0.0008               | 2.39, 1.55-3.68 |
| Per T allele | 338               | 40.4 | 238                 | 28.8 | 0.000002             | 0.61, 0.49-0.74 |
| rs2819941    |                   |      |                     |      | 0.0002               |                 |
| CC           | 114               | 27.3 | 94                  | 22.8 | 0.141                | 1.27, 0.93-1.74 |
| CT           | 226               | 54.1 | 190                 | 46.1 | 0.021                | 1.38, 1.05-1.81 |
| TT           | 78                | 18.7 | 128                 | 31.1 | 0.0004               | 0.51, 0.37-0.70 |
| Per T allele | 382               | 45.7 | 446                 | 54.1 | 0.0006               | 1.41, 1.16-1.71 |

<sup>a</sup> P-value was calculated by 2×3 and 2×2 chi-squared tests based on codominant, dominant for the rare allele, heterosis and recessive for the rare allele models of inheritance.

Alpha value is adjusted by Bonferroni correction and statistically significant results (P<0.003)

1 **Table 2** ANXA11 haplotype in block 2 frequencies and the results of their associations with risk  
 2 of sarcoidosis

| Haplotype |           |           | Genecounting (frequency %) |          |                      |                       |
|-----------|-----------|-----------|----------------------------|----------|----------------------|-----------------------|
| ID        | rs1049550 | rs2573351 | Cases                      | Controls | P-value <sup>a</sup> | Global P <sup>b</sup> |
| HAP1      | T         | C         | 27.7                       | 39.7     | 0.001                | 0.003                 |
| HAP2      | C         | C         | 19.9                       | 7.4      | 0.0001               |                       |
| HAP3      | C         | T         | 50.5                       | 51.0     | 0.892                |                       |

3 <sup>a</sup> Based on 10,000 permutations.

4 <sup>b</sup> Based on comparison of frequency distribution of all haplotypes for the combination of SNPs.

5  
 6 **Table 3** ANXA11 haplotype in block 3 frequencies and the results of their associations with risk  
 7 of sarcoidosis

| Haplotype |           |           | Genecounting (frequency %) |          |                      |                       |
|-----------|-----------|-----------|----------------------------|----------|----------------------|-----------------------|
| ID        | rs2789695 | rs2573356 | Cases                      | Controls | P-value <sup>a</sup> | Global P <sup>b</sup> |
| HAP1      | C         | T         | 33.7                       | 34.9     | 0.718                | 0.045                 |
| HAP2      | T         | T         | 15.3                       | 14.1     | 0.632                |                       |
| HAP2      | T         | T         | 15.6                       | 14.1     | 0.565                |                       |

8 <sup>a</sup> Based on 10,000 permutations.

9 <sup>b</sup> Based on comparison of frequency distribution of all haplotypes for the combination of SNPs.

1

2

3

4

5

6

7

8

9

10

11

12

13

14

15

16

17

18

19

20

21

22

23

24

25

26

27

28

29

30

31

32

**Table 4** Chest radiographic (CXR) stages of sarcoidosis patients by genotype of rs2789679, rs1049550 and rs2819941

| Stages         | rs2789679 (n, %) |              |              | rs1049550* (n, %) |              |              | rs2819941 (n, %) |              |              |
|----------------|------------------|--------------|--------------|-------------------|--------------|--------------|------------------|--------------|--------------|
|                | AA               | AT           | TT           | CC                | CT           | TT           | CC               | CT           | TT           |
| stage I        | 59<br>(30.1)     | 92<br>(47.0) | 45<br>(23.0) | 101<br>(51.5)     | 82<br>(41.8) | 13<br>(6.6)  | 47<br>(25.0)     | 88<br>(44.9) | 61<br>(31.1) |
| stages II - IV | 46<br>(27.6)     | 75<br>(44.9) | 46<br>(27.6) | 72<br>(43.1)      | 68<br>(40.7) | 27<br>(16.2) | 41<br>(24.6)     | 73<br>(43.7) | 53<br>(31.7) |
| $\chi^2, P$    | 1.041, 0.594     |              |              | 8.807, 0.012      |              |              | 0.052, 0.975     |              |              |

\*  $P$  values for genotype frequency distribution ( $P < 0.05$ ).

4

5

6



1  
2  
3  
4 1 **Annexin A11 (ANXA11) gene polymorphisms are associated with sarcoidosis in a**

5  
6 2 **Han Chinese population - a case-control study**

7  
8  
9 3 LG Zhang, ZJ Xiao\*, GC Shi, J Huang, CX Zhang

10  
11 4 The Third Department of Tuberculosis, the First Hospital Affiliated to the Xinxiang

12  
13  
14 5 Medical College, Xinxiang, Henan, PR China

15  
16 6 \*Corresponding author: Zhijian Xiao, The Third Department of Tuberculosis, the First

17  
18  
19 7 Hospital Affiliated to the Xinxiang Medical College, Xinxiang, Henan, PR China.

20  
21 8 No.88 Jiankang Road, Weihui City, Henan, 463000, PR China

22  
23  
24 9 E-mail: zhangligongys@163.com

25  
26 10 Tel: +86 0373 - 4402229 (office)

27  
28  
29 11 Fax: +86 0373 -4402251

30  
31 12 **Key words:** Sarcoidosis; Annexin A11; Single-nucleotide polymorphism

32  
33  
34 13 Word count: 3918

35  
36  
37  
38  
39  
40  
41  
42  
43  
44  
45  
46  
47  
48  
49  
50  
51  
52  
53  
54  
55  
56  
57  
58  
59  
60 14

1  
2  
3  
4 **Abstract**

5  
6 **Objectives:** To further identify the single-nucleotide polymorphisms (SNPs) that  
7  
8  
9  
10  
11  
12  
13  
14  
15  
16  
17  
18  
19  
20  
21  
22  
23  
24  
25  
26  
27  
28  
29  
30  
31  
32  
33  
34  
35  
36  
37  
38  
39  
40  
41  
42  
43  
44  
45  
46  
47  
48  
49  
50  
51  
52  
53  
54  
55  
56  
57  
58  
59  
60  
3 contribute to the genetic susceptibility to sarcoidosis, we examined the potential  
4 association between sarcoidosis and fifteen SNPs of the ANXA11 gene.

5 **Design:** A case - control study.

6 **Setting:** A tuberculosis unit in a hospital of the university in China.

7 **Participants:** Participants included 412 patients with sarcoidosis and 418 healthy  
8  
9  
10  
11  
12  
13  
14  
15  
16  
17  
18  
19  
20  
21  
22  
23  
24  
25  
26  
27  
28  
29  
30  
31  
32  
33  
34  
35  
36  
37  
38  
39  
40  
41  
42  
43  
44  
45  
46  
47  
48  
49  
50  
51  
52  
53  
54  
55  
56  
57  
58  
59  
60  
8 controls.

9 **Methods:** The selected SNPs were genotyped using the MALDI-TOF in the  
10  
11  
12  
13  
14  
15  
16  
17  
18  
19  
20  
21  
22  
23  
24  
25  
26  
27  
28  
29  
30  
31  
32  
33  
34  
35  
36  
37  
38  
39  
40  
41  
42  
43  
44  
45  
46  
47  
48  
49  
50  
51  
52  
53  
54  
55  
56  
57  
58  
59  
60  
MassARRAY system. ~~Probes and primers were designed using the Assay Design  
Software (Sequenom, San Diego, CA, USA).~~

12 **Results:** The statistical significant differences were found in the allelic or genotypic  
13  
14  
15  
16  
17  
18  
19  
20  
21  
22  
23  
24  
25  
26  
27  
28  
29  
30  
31  
32  
33  
34  
35  
36  
37  
38  
39  
40  
41  
42  
43  
44  
45  
46  
47  
48  
49  
50  
51  
52  
53  
54  
55  
56  
57  
58  
59  
60  
frequencies of the rs2789679, rs1049550 and rs2819941 in the ANXA11 gene  
between the patients with sarcoidosis and the controls. The rs2789679 A allele ( $P =$   
0.00004, OR = 1.42, 95%CI = 1.17-1.73) and rs2819941 T allele ( $P = 0.0006$ , OR =  
1.41, 95%CI = 1.16-1.71) were significantly more frequent in the patients with  
sarcoidosis compared to controls. The frequency of the rs1049550 T allele ( $P =$   
0.000002, OR = 0.61, 95%CI= 0.49 - 0.74) in the patients with sarcoidosis was  
significantly lower than that in the controls. The multi-SNP model reveals that  
rs1049550 is the only independent SNP association effect after accounting for the  
other two marginally associated SNPs. The strong linkage disequilibrium (LD) was  
observed in four blocks ( $D' > 0.9$ ). In block 2 (rs1049550-rs2573351), the T - C

1  
2  
3  
4 1 haplotype occurred significantly less frequently ( $P = 0.001$ ), whereas the C - C  
5  
6 2 haplotypes occurred more frequently ( $P = 0.0001$ ) in the patients with sarcoidosis  
7  
8  
9 3 than the controls. Furthermore, genotype frequency distribution revealed that, in  
10  
11 4 rs1049550, CC genotype was significantly more in the patients with chest  
12  
13  
14 5 radiographic (CXR) stage I sarcoidosis than the patients with CXR stage II-IV  
15  
16 6 sarcoidosis ( $P = 0.012$ ).

17  
18  
19 7 **Conclusions:** These findings point to a role for the polymorphisms of ANXA11 in  
20  
21 8 sarcoidosis in a Chinese Han population, and may be informative for future genetic  
22  
23  
24 9 studies on sarcoidosis.  
25  
26  
27  
28  
29  
30  
31  
32  
33  
34  
35  
36  
37  
38  
39  
40  
41  
42  
43  
44  
45  
46  
47  
48  
49  
50  
51  
52  
53  
54  
55  
56  
57  
58  
59  
60

1  
2  
3  
4 **1 Article summary**

5  
6 **2 Article focus**

7  
8  
9 3 1. The first genome-wide association study (GWAS) in sarcoidosis conducted in a  
10  
11 4 German population has revealed that the rs1049550 (C > T, Arg230Cys) located in  
12  
13 5 exon 10 were associated with sarcoidosis.

14  
15  
16 6 2. Whether these SNPs modulate the risk of sarcoidosis by themselves or whether  
17  
18 7 they correlate with other causative SNPs and are repeated in other populations remain  
19  
20 8 unclear.

21  
22 9 3. We hypothesize that common variants in the ANXA11 gene may significantly  
23  
24 10 contribute to the predisposition to develop sarcoidosis in a Chinese Han population.

25  
26  
27  
28  
29 **11 Key messages**

30  
31 12 1. ANXA11 rs2789679 (3'-UTR) was significantly associated with sarcoidosis.

32  
33 13 2. ANXA11 rs1049550 (exon 10) was significantly associated with sarcoidosis.

34  
35 14 3. Another significant association was observed for rs2819941 (intron 14).

36  
37  
38  
39 **15 Strengths and limitations of this study**

40  
41 16 1. A systematical screening of the functional SNPs in the promoter region, 5'- and  
42  
43 17 3'-UTR, exons of the ANXA11 gene, and the homogeneity of the study subjects  
44  
45 18 representing the Chinese Han are the main strengths of this study.

46  
47  
48 19 2. The lack of data proving the positive association observed for rs2789679 and  
49  
50 20 rs1049550 is a potential limitation of this study. Furthermore, the association of the  
51  
52 21 serum level of ANXA11 with sarcoidosis still needs to be investigated.

53  
54  
55  
56 **22 INTRODUCTION**

1 Sarcoidosis is a systemic autoimmune disease characterized by destructive,  
2 non-caseating epithelioid granulomatous lesions, with accumulated phagocytes and  
3 activated CD4<sup>+</sup> T helper type 1 lymphocytes<sup>1 2</sup>. The typical manifestations of  
4 sarcoidosis include bilateral hilar lymphadenopathy, pulmonary infiltration and ocular  
5 and skin lesions. The clinical course and prognosis of sarcoidosis are variable. The  
6 acute forms of sarcoidosis such as Löfgren's syndrome (LS) can resolve  
7 spontaneously in most cases. However, chronic pulmonary sarcoidosis may progress  
8 to lung fibrosis which eventually causes respiratory failure. Recent studies have  
9 demonstrated that sarcoidosis can occur in a pattern of family clustering, and its racial  
10 incidence is also different, suggesting that some genetic factors may contribute to the  
11 risk and severity of sarcoidosis<sup>1 3</sup>.

12 The Annexin gene family is involved in the etiology of several autoimmune and  
13 chronic diseases<sup>4 5</sup>. One member of the Annexin gene family, ANXA11, located on  
14 chromosome 10q22.3, is involved in calcium signaling, apoptosis, vesicle trafficking,  
15 cell growth and terminal phase of cell division<sup>5-7</sup>. In this context, the development  
16 and maintenance of the granulomatous inflammation in sarcoidosis have been  
17 repeatedly associated with the impaired apoptosis of activated inflammatory cells<sup>8 9</sup>.  
18 Most of the early-stage sarcoidosis is characterized by mononuclear cell alveolitis  
19 dominated by activated CD4<sup>+</sup> T cells and macrophages. Between these cells, the  
20 uncoordinated interplay results in the formation of typical non-caseating granulomas.  
21 The mechanism by which the granulomas resolve has not been fully elucidated.  
22 However, it is generally assumed that the induction of apoptosis and/or by the

1 withdrawal of inflammatory cytokines participates in the disappearance of  
2 granulomas<sup>10 11</sup>. In the patients with sarcoidosis, their peripheral blood monocytes  
3 were characterized by apoptosis<sup>9</sup>.

4 In previous studies, case - control/family ‘hypothesis - driven’ studies and low  
5 density linkage scans were used to identify genetic factors conferring the genetic  
6 susceptibility to sarcoidosis<sup>12</sup>. Notably, the first genome - wide association study  
7 (GWAS) in sarcoidosis conducted in a German population has recently revealed an  
8 association: the leading rs2789679 SNP (single - nucleotide polymorphism) located in  
9 the 3’-untranslated region (3’-UTR) and a common nonsynonymous SNP (rs1049550,  
10 C > T, Arg230Cys) were associated with the increased risk of sarcoidosis<sup>4 13</sup>. This  
11 association has recently been supported by another report from the same population<sup>14</sup>.  
12 Thus, more studies should be performed to demonstrate the following items: whether  
13 these SNPs modulate the risk of sarcoidosis by themselves or whether they correlate  
14 with other causative SNPs and are repeated in other populations. The published  
15 studies about the association of sarcoidosis and ANXA11 are summarized in  
16 Supplemental table 1. We hypothesize that common variants in the ANXA11 gene  
17 may significantly contribute to the predisposition to develop sarcoidosis.

18 In this study, we investigated fifteen loci in a Chinese population from He’nan  
19 province (China) to verify the putative association between ANXA11 polymorphisms  
20 and sarcoidosis.

## 21 **SUBJECTS AND METHODS**

### 22 **Subjects**

1  
2  
3  
4 1 Four hundred and twelve patients with sarcoidosis (mean  $\pm$  SD age:  $53.6 \pm 4.6$   
5  
6 2 years; 155 men and 257 women) were recruited from our hospital between May 2005  
7  
8  
9 3 and March 2013. Sarcoidosis was diagnosed by the evidence of non-caseating  
10  
11 4 epitheloid cell granuloma in biopsy specimens and chest radiographic abnormalities.  
12  
13  
14 5 Chronic sarcoidosis was defined as a disease over at least 2 years or at least two  
15  
16 6 episodes in a lifetime. A acute sarcoidosis was defined as one episode of acute  
17  
18  
19 7 sarcoidosis which had totally resolved at the date of the examination. The control  
20  
21 8 group consisted of 418 unrelated healthy subjects (mean  $\pm$  SD age:  $54.2 \pm 5.3$  years;  
22  
23  
24 9 160 men and 258 women) who underwent health examinations in the Medical  
25  
26 10 Examination Center of the First Affiliated Hospital of the Xinxiang Medical College  
27  
28  
29 11 (Xinxiang, China) between Oct 2009 and Sept 2013. None of the individuals in the  
30  
31 12 control group had a history of lung diseases or showed any symptoms of the lung or  
32  
33  
34 13 other diseases by chest radiography or laboratory blood tests. Participants were  
35  
36 14 excluded if they: were taking other prescribed medications that could affect the  
37  
38  
39 15 central nervous system; had a history of seizures, hematological diseases, or severe  
40  
41 16 liver or kidney impairment; or were pregnant. No familial relationship was known  
42  
43  
44 17 between the study participants. The study was performed according to the Guidelines  
45  
46 18 of the Medical Ethical Committee of Xinxiang Medical College (Xinxiang, China).  
47  
48  
49 19 Written informed consent was obtained from each participant in this study.

## 50 51 **SNP selection**

52  
53  
54 21 Tagging SNPs were selected from the catalogs of the International HapMap  
55  
56 22 Project. The rs2789679 and rs2245168 are located in 5'-UTR, rs2236558 in intron 6,  
57  
58  
59  
60

1  
2  
3  
4 1 rs7067644 and rs12763624 in intron 8, rs1049550 in exon 10, rs2573351 in intron 13,  
5  
6 2 rs10887581, rs11201989, rs2573353, rs2789695, rs2573356, rs2819945, rs11202059  
7  
8  
9 3 and rs2819941 in intron 14 (Supplemental figure 1). Marker selection was based on  
10  
11 4 the following criteria. (a) We used the CHB data from the HapMap (release 27) to  
12  
13 5 select tagSNPs for ANXA11. (b) We restricted our search for tagSNPs from base pair  
14  
15 6 80155124 to 80205677. (c) Further, we limited the SNPs to tag to those with a minor  
16  
17 7 allele frequency  $\geq 0.2$  in the CHB. (d) Based on these restrictions, there were a total  
18  
19 8 of 29 SNPs. (e) Using HAPLOVIEW with an  $r^2$  threshold  $\geq 0.8$ , 15 tagSNP were  
20  
21 9 selected and used for subsequent analyses.  
22  
23  
24  
25

## 26 **Genotyping**

27  
28  
29 11 Peripheral blood was collected from a vein into a sterile tube coated with  
30  
31 12 ethylenediamine tetraacetic acid (EDTA). Plasma samples were stored at  $-20^{\circ}\text{C}$ .  
32  
33 13 Genomic DNA was extracted from the frozen peripheral blood samples using a  
34  
35 14 QIAmp Blood Mini Kit (Qiagen Inc., Valencia, CA, USA) according to the  
36  
37 15 manufacturer's protocols. The selected SNPs were genotyped in cases and controls by  
38  
39 16 using the MALDI-TOF in the MassARRAY system (Sequenom Inc., San Diego, CA,  
40  
41 17 USA). Probes and primers were designed using the Assay Design Software  
42  
43 18 (Sequenom, San Diego, CA, USA). The completed genotyping reactions were spotted  
44  
45 19 onto a 384 well spectroCHIP (Sequenom) using the MassARRAY Nanodispenser  
46  
47 20 (Sequenom) and determined by the matrix - assisted laser desorption ionization time -  
48  
49 21 of - flight mass spectrometer. Genotype calling was performed in realtime with the  
50  
51 22 MassARRAY RT software version 3.0.0.4 and analyzed using the MassARRAY Typer  
52  
53  
54  
55  
56  
57  
58  
59  
60



1 software version 3.4 (Sequenom).

## 2 **Statistical analysis**

3 All data were analyzed using the SPSS 17.0 software (SPSS Inc., Chicago, IL,  
4 USA). Hardy-Weinberg equilibrium was evaluated by Chi-square tests. Differences  
5 between the cases and controls in the frequency of the alleles, genotypes and  
6 haplotypes were evaluated by the Fisher's exact test or the Pearson Chi-square test.  
7 Unconditional logistic regression was used to calculate the odds ratio (OR) and 95%  
8 confidence interval (CI) in independent association between each locus and the  
9 presence of sarcoidosis. Gender and age of subjects were treated as covariants in  
10 binary logistic regression. *P* values were calculated based on codominant, dominant  
11 for the rare allele, heterosis and recessive for the rare allele models of inheritance.  
12 Models of multiple logistic regression were used to test the independence of  
13 individual allelic effect. In detail, the most significant SNP was chosen to be the  
14 conditional SNP (covariate in the regression model) when testing other significant  
15 SNPs; Meanwhile, a multi-SNP model including all significant SNPs was also  
16 performed. The Bonferroni correction was used to adjust the test level when multiple  
17 comparisons were conducted, and the *P* value was divided by the total number of loci.  
18 Haplotype blocks were defined according to the criteria developed by Gabriel et al.<sup>15</sup>.  
19 Pair-wise LD statistics ( $D'$  and  $r^2$ ) and haplotype frequency were calculated, and  
20 haplotype blocks were constructed using the Haploview 4.0<sup>16</sup>. To ensure that the LD  
21 blocks most closely reflect the population level LD patterns, definition of the blocks  
22 were based on the control samples alone. The haplotype frequencies were estimated

1 using GENECOUNTING, which computes maximum - likelihood estimates of  
2 haplotype frequencies from unknown phase data by utilizing an expectation -  
3 maximization algorithm<sup>17-20</sup>. The significance of any haplotypic association was  
4 evaluated using a likelihood ratio test, followed by permutation testing that compared  
5 estimated haplotype frequencies in cases and controls<sup>17 19</sup>.

## 6 RESULTS

7 The genotype distribution of the fifteen polymorphisms was consistent with the  
8 Hardy-Weinberg equilibrium ( $P > 0.05$ ). The analysis of strong LD in the patients  
9 with sarcoidosis and healthy controls revealed that 2 SNPs (rs2245168, rs2236558), 2  
10 SNPs (rs1049550, rs2573351), 2 SNPs (rs2789695, rs2573356) and 3 SNPs  
11 (rs2819945, rs11202059, rs2819941) were located in haplotype block 1, block 2,  
12 block 3 and block 4 ( $D' > 0.9$ , Fig. 1). The genotype distribution, allelic frequencies,  
13 and haplotypes in the patients with sarcoidosis and healthy controls are showed in  
14 Tables 1-3 and Supplemental table 2

15 Comparison of genotype and allele frequency distribution revealed significant  
16 differences between the patients with sarcoidosis and healthy controls for 3 SNPs:  
17 rs2789679, rs1049550 and rs2819941. ~~The rs2789679 A allele ( $P = 0.00004$ , OR =~~  
18 ~~1.42, 95%CI = 1.17-1.73) and rs2819941 T allele ( $P = 0.0006$ , OR = 1.41, 95%CI =~~  
19 ~~1.16-1.71) were significantly more frequent in the patients with sarcoidosis compared~~  
20 ~~to controls.~~ The frequency of the rs1049550 T allele ( $P = 0.000002$ , OR = 0.61,  
21 95%CI= 0.49-0.74) in the patients with sarcoidosis was significantly lower than that  
22 in the controls. These differences remained statistically significant after Bonferroni

1 corrections. The rs1049550 was the most significant of the three. A multi-SNP model  
2 revealed rs1049550 to be the only significant independent SNP association with  
3 sarcoidosis risk.

4 The multi-SNP model showed only rs1049550 present a significant effect on the  
5 disease phenotype ( $p < 0.001$ ). No independent effect was found for rs2789679 or  
6 rs2819941 when adjusting for the effect of rs1049550. Both individual SNP and multi -  
7 SNP analysis supported rs1049550: T allele was an important protective factor for  
8 affecting sarcoidosis (odds ratio around 0.6). In another word, carriers of rs1049550:  
9 C allele have higher susceptibility to sarcoidosis in our Chinese Han population  
10 (Supplemental table 3).

11 We performed an association analysis to determine whether the haplotype was  
12 associated with the risk of sarcoidosis (Global  $P < 0.05$  in block 2 and block 3).  
13 Compared with the controls, the T - C haplotype occurred significantly less frequently  
14 ( $P = 0.001$ ) but the C - C haplotypes occurred more frequently ( $P = 0.0001$ ) in block 2  
15 (rs1049550 - rs2573351) in the patients with sarcoidosis.

16 To assess particular disease phenotypes, the patients with sarcoidosis were  
17 divided into the subgroups according to their chest radiographic (CXR) stage. CXR  
18 stage I (isolated bilateral hilar lymphadenopathy):  $N = 196$ ; CXR stages II - IV  
19 (infiltration of parenchyma): 167; CXR stage 0 (absence on pulmonary disease):  $N =$   
20 28; the information on CXR stage was not available for 21 patients. Genotype  
21 frequency distribution revealed that, in rs1049550, CC genotype was significantly  
22 more in the patients with chest radiographic (CXR) stage I sarcoidosis than the

1 patients with CXR stage II-IV sarcoidosis ( $P = 0.012$ ). (Table 4).

## 2 **DISCUSSION**

3 A key step in linkage and association studies is to identify common risk variants  
4 in different populations. To determine if common risk variants exist in distinct  
5 populations, fifteen SNPs which span approximately 0.53 Mb of the ANXA11 gene,  
6 were genotyped in samples from the patients with sarcoidosis and healthy controls in  
7 a Chinese Han population. Recently, new sarcoidosis loci have been identified by  
8 genome-wide association studies<sup>4 14</sup>. With the fast development of genome - wide  
9 association studies, an increasing number of susceptibility loci for sarcoidosis have  
10 been found in different populations<sup>4 14 21</sup>. However, these observations should be  
11 confirmed in other genetically independent populations. In this study, we conducted  
12 the first large genetic association study of the ANXA11 gene in a Chinese Han  
13 population. The evidence of markers associated with sarcoidosis was presented, and  
14 these markers were mapped to different locations in the ANXA11 gene (81897864 -  
15 81951001). The association signals in the region were identified, and some  
16 significantly associated haplotypes also appeared this region.

17 Hoffman et al. reported an association between the T allele of the non -  
18 synonymous SNP rs1049550 and significantly decreased risk of sarcoidosis in a  
19 German population<sup>4</sup>. Similar results were also obtained in other two European  
20 populations<sup>14 21</sup>. As a part of the sarcoidosis GWAS done in Americans<sup>22</sup>, we further  
21 confirmed this association in a Chinese Han population. In this study, the frequency of  
22 ANXA11 rs1049550 T allele was significantly lower in the patients with sarcoidosis

1  
2  
3  
4 1 than the healthy controls. Genotype frequency distribution revealed that, in rs1049550,  
5  
6 2 CC genotype was significantly more in the patients with stage I sarcoidosis than the  
7  
8 3 patients with stage II-IV sarcoidosis. The “protective” effect of ANXA11 T allele  
9  
10 4 increased with the number of its copies in the genotype, which is consistent with the  
11  
12 5 result obtained in the patients with sarcoidosis in a German population <sup>4</sup>, Furthermore,  
13  
14 6 the T allele carriers among the patients were protected from infiltration of lung  
15  
16 7 parenchyma (radiographic stages II-IV) <sup>21</sup>. We have also demonstrated that rs1049550  
17  
18 8 is significant cross - ethnically at the gene level after adjustment for the single SNP  
19  
20 9 association tests performed. The mechanism by which rs1049550 affects the  
21  
22 10 susceptibility to sarcoidosis is that the SNP may affect the function of the ANXA11  
23  
24 11 protein rather than affect its expression. In humans, the ANXA11 protein consists of  
25  
26 12 an N - terminalproline - tyrosine - glycine (PYG) - rich region, followed by four  
27  
28 13 annexin core domains. The rs1049550 leads to an amino - acid exchange (basic  
29  
30 14 arginine to a polar cysteine) at the evolutionarily conserved position 230 (R230C) in  
31  
32 15 the first annexin domain, which is responsible for Ca<sup>2+</sup> - dependent trafficking of the  
33  
34 16 protein in the cell <sup>23</sup>.

35  
36  
37  
38  
39  
40  
41  
42  
43 17 In the GWAS conducted by Hofmann et al <sup>4</sup>, the strongest association signal was  
44  
45 18 observed for rs2789679. This marker is located in the 3'-UTR of the ANXA11 gene.  
46  
47 19 The T allele had a frequency of 35% among the patients with sarcoidosis and 44% in  
48  
49 20 the healthy controls, with 13% of the patients with sarcoidosis and 19% of controls  
50  
51 21 being TT homozygous. Fine-mapping in the Black Women's Health Study (BWHS)  
52  
53 22 revealed rs2819941 to be the top SNP, associated with a non-significant ( $P = 0.06$ )  
54  
55  
56  
57  
58  
59  
60

1 reduction in the risk of sarcoidosis (17% reduction per copy of the C-allele). In this  
2 case-control association study, the frequency of the A allele in rs2789679 and the  
3 rs2819941 T allele frequency in the patients with sarcoidosis was significantly higher  
4 than that in the healthy controls. Several lines of evidence suggest that the observed  
5 association is unlikely to be an artifact. First, both the single-SNP and the  
6 haplotype-based association analyses support the current finding. Second, our samples  
7 were from the same geographical region, excluding the. Finally, consistent results  
8 were obtained from two genetically independent populations (Chinese Han and  
9 Europeans). Collectively, our results confirmed the strong association between  
10 ANXA11 polymorphisms and sarcoidosis, suggesting that ANXA11 represents a  
11 strong genetic risk factor for sarcoidosis. Since causal SNP in ANXA11 was not  
12 known, all the SNPs significantly associated with sarcoidosis were actually indirect  
13 association through the real causal one. Though rs2789679 and rs2819941 were not in  
14 LD with rs1049550, it may not tag the causal SNP as well as rs1049550. Hence, their  
15 individual effects were eliminated when controlling for the effect of rs1049550.

16 We further investigated the interaction among polymorphisms and observed  
17 strong LD. The haplotype analysis revealed that significantly more C - C (block 2,  
18 rs1049550 - rs2573351) and significantly fewer T - C haplotypes (block 2) were  
19 found in the patients with sarcoidosis. These results indicated that the patients with C  
20 - C (block 2) haplotypes of the ANXA11 gene were more prone to sarcoidosis.  
21 Significantly higher frequencies of T - C haplotypes were detected in the healthy  
22 controls than in the patients with sarcoidosis, suggesting that they may show

1 protective effects against sarcoidosis. Our sample size can detect SNP and haplotype  
2 associations with 90% and 85% power, respectively, at a false positive rate of 5%,  
3 disease prevalence of 1%, disease allele / haplotype frequency of 0.05 / 0.03, and a  
4 presumed odds ratio (OR) of 1.5. To some extent, this finding further supports a role  
5 of ANXA11 polymorphisms in sarcoidosis, while ethnic group difference may exist.

6 \_\_\_\_\_ In conclusion, our study suggests a potential role of the ANXA11 SNPs and their  
7 related haplotypes in the genetic susceptibility to sarcoidosis. Further studies are  
8 needed to investigate how these SNPs affect the function of ANXA11. A broader  
9 examination of the genetic variation in ANXA11 in the Han Chinese may reveal other  
10 variants associated with disease risk.

11

## 12 **Contributors**

13 LG Zhang was involved in conception and design of the study, acquisition of  
14 patient data, genotyping and drafted the paper. ZJ Xiao and GC Shi were involved in  
15 design of the study, genotyping and interpretation of results. J Huang and CX Zhang  
16 were involved in the design of the study, acquisition of patient data and interpretation  
17 of result. All authors revised the draft paper.

## 18 **Funding**

19 The project was supported by the Research and Development Foundation of  
20 Science and Technology of Henan Province (2012k15).

## 21 **Competing interests**

22 None.

1  
2  
3  
4 **1 Patient consent**

5  
6 2 Obtained.

7  
8  
9 **3 Ethics approval**

10  
11 4 Ethics approval was provided by the First Hospital Affiliated to the Xinxiang  
12  
13  
14 5 Medical College.

15  
16 **6 Provenance and peer review**

17  
18  
19 7 Not commissioned; externally peer reviewed.

20  
21 **8 Data sharing statement**

22  
23  
24 9 No additional data are available.

25  
26 **10 Figure Legend**

27  
28  
29 **Fig. 1** The LD plot of the fifteen SNPs in the ANXA11 gene. Values in squares are the  
30  
31 pair-wise calculation of  $r^2$  (left) or  $D'$  (right). Black squares indicate  $r^2 = 1$  (i.e. perfect  
32  
33 LD between a pair of SNPs). Empty squares indicate  $D' = 1$  (i.e. complete LD  
34  
35 between a pair of SNPs).  
36  
37

38  
39 **Supplemental Fig. 1** The structure of the human ANXA11 gene and 15 SNPs located  
40  
41 on the gene.  
42

43  
44 **17 Reference**

- 45  
46 18 1. Iannuzzi MC, Rybicki BA, Teirstein AS. Sarcoidosis. *N Engl J Med* 2007;  
47  
48 357:2153-65.  
49  
50 20 2. Baughman RP, Lower EE, du Bois RM. Sarcoidosis. *Lancet* 2003;361:1111-8  
51  
52  
53 21 3. Grunewald J. Review: role of genetics in susceptibility and outcome of sarcoidosis.  
54  
55  
56 22 *Semin Respir Crit Care Med* 2010;31:380-9.  
57  
58  
59  
60



- 1 4. Hofmann S, Franke A, Fischer A, *et al.* Genome-wide association study identifies  
2 ANXA11 as a new susceptibility locus for sarcoidosis. *Nat Genet*  
3 2008;40:1103-6.
- 4 5. Gerke V, Moss SE. Annexins: from structure to function. *Physiol Rev*  
5 2002;82:331-71.
- 6 6. Farnaes L, Ditzel HJ. Dissecting the cellular functions of annexin XI using  
7 recombinant human annexin XI-specific autoantibodies cloned by phage  
8 display. *J Biol Chem* 2003;278:33120-6.
- 9 7. Tomas A, Futter C, Moss SE. Annexin 11 is required for midbody formation and  
10 completion of the terminal phase of cytokinesis. *J Cell Biol* 2004;165:813-22.
- 11 8. Petzmann S, Maercker C, Markert E, *et al.* Enhanced proliferation and decreased  
12 apoptosis in lung lavage cells of sarcoidosis patients. *Sarcoidosis Vasc Diffuse*  
13 *Lung Dis* 2006;23:190-200
- 14 9. Dubaniewicz A, Trzonkowski P, Dubaniewicz-Wybieralska M, *et al.* Comparative  
15 analysis of mycobacterial heat shock proteins-induced apoptosis of peripheral  
16 blood mononuclear cells in sarcoidosis and tuberculosis. *J Clin Immunol*  
17 2006;26:243-50.
- 18 10. Agostini C, Trentin L, Facco M, *et al.* Role of IL-15, IL-2, and their receptors in  
19 the development of T cell alveolitis in pulmonary sarcoidosis. *J Immunol*  
20 1996;157:910-8
- 21 11. Jullien D, Sieling PA, Uyemura K, *et al.* IL-15, an immunomodulator of T cell  
22 responses in intracellular infection. *J Immunol* 1997;158:800-6

- 1  
2  
3  
4 12. Muller-Quernheim J, Schurmann M, Hofmann S, *et al.* Genetics of sarcoidosis.  
5  
6 2 *Clin Chest Med* 2008;29:391-414.  
7  
8  
9 3 13. Morais A, Lima B, Peixoto M, *et al.* Annexin A11 gene polymorphism (R230C  
10  
11 4 variant) and sarcoidosis in a Portuguese population. *Tissue antigens*  
12  
13 5 2013;82:186-91.  
14  
15  
16 6 14. Li Y, Pabst S, Kubisch C, *et al.* First independent replication study confirms the  
17  
18 7 strong genetic association of ANXA11 with sarcoidosis. *Thorax*  
19  
20 8 2010;65:939-40.  
21  
22  
23 9 15. Gabriel SB, Schaffner SF, Nguyen H, *et al.* The structure of haplotype blocks in  
24  
25 10 the human genome. *Science* 2002;296:2225-9.  
26  
27  
28 11 16. Barrett JC, Fry B, Maller J, *et al.* Haploview: analysis and visualization of LD and  
29  
30 12 haplotype maps. *Bioinformatics* 2005;21:263-5.  
31  
32  
33 13 17. Curtis D, Knight J, Sham PC. Program report: GENECOUNTING support  
34  
35 14 programs. *Ann Hum Genet* 2006;70:277-9.  
36  
37  
38 15 18. Zhao JH, Curtis D, Sham PC. Model-free analysis and permutation tests for allelic  
39  
40 16 associations. *Hum Hered* 2000;50:133-9.  
41  
42  
43 17 19. Zhao JH, Lissarrague S, Essioux L, *et al.* GENECOUNTING: haplotype analysis  
44  
45 18 with missing genotypes. *Bioinformatics* 2002;18:1694-5  
46  
47  
48 19 20. Zhao JH, Sham PC. Generic number systems and haplotype analysis. *Comput*  
49  
50 20 *Methods Programs Biomed* 2003;70:1-9  
51  
52  
53 21 21. Mrazek F, Stahelova A, Kriegova E, *et al.* Functional variant ANXA11 R230C:  
54  
55 22 true marker of protection and candidate disease modifier in sarcoidosis. *Genes*  
56  
57  
58  
59  
60

- 1  
2  
3  
4 1           *Immun* 2011;12:490-4.  
5  
6 22. Levin AM, Iannuzzi MC, Montgomery CG, *et al.* Association of ANXA11 genetic  
7  
8           variation with sarcoidosis in African Americans and European Americans.  
9  
10           *Genes Immun* 2013;14:13-8.  
11  
12 24. Tomas A, Moss SE. Calcium- and cell cycle-dependent association of annexin 11  
13  
14           with the nuclear envelope. *J Biol Chem* 2003;278:20210-6.  
15  
16  
17  
18  
19  
20  
21  
22  
23  
24  
25  
26  
27  
28  
29  
30  
31  
32  
33  
34  
35  
36  
37  
38  
39  
40  
41  
42  
43  
44  
45  
46  
47  
48  
49  
50  
51  
52  
53  
54  
55  
56  
57  
58  
59  
60

1  
2  
3  
4  
5  
6  
7  
8  
9  
10  
11  
12  
13  
14  
15  
16  
17  
18  
19  
20  
21  
22  
23  
24  
25  
26  
27  
28  
29  
30  
31  
32  
33  
34  
35  
36  
37  
38  
39  
40  
41  
42  
43  
44  
45  
46  
47  
48  
49  
50  
51  
52  
53  
54  
55  
56  
57  
58  
59  
60

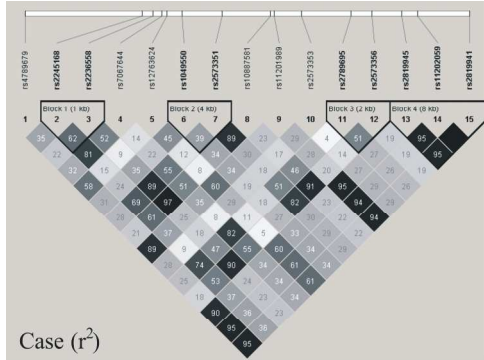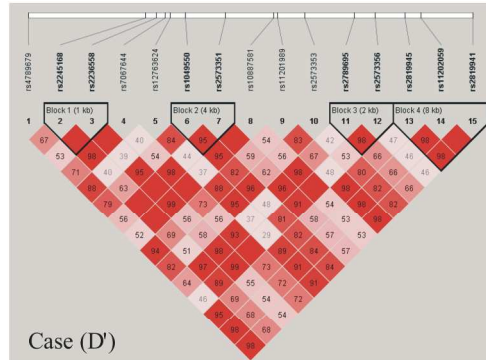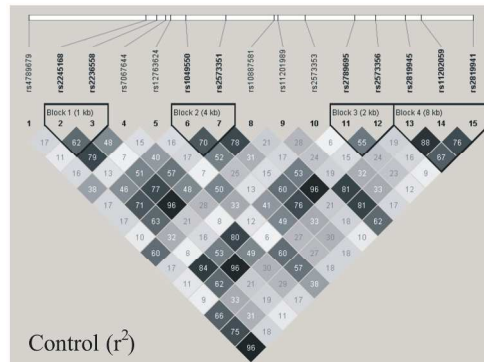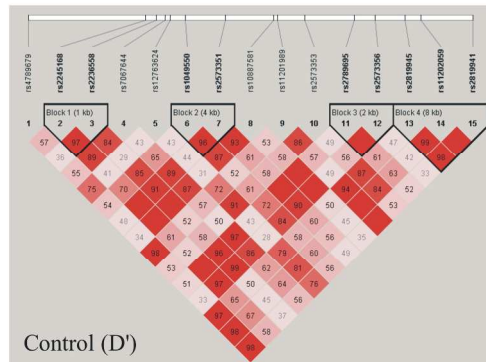

273x203mm (300 x 300 DPI)

Review only

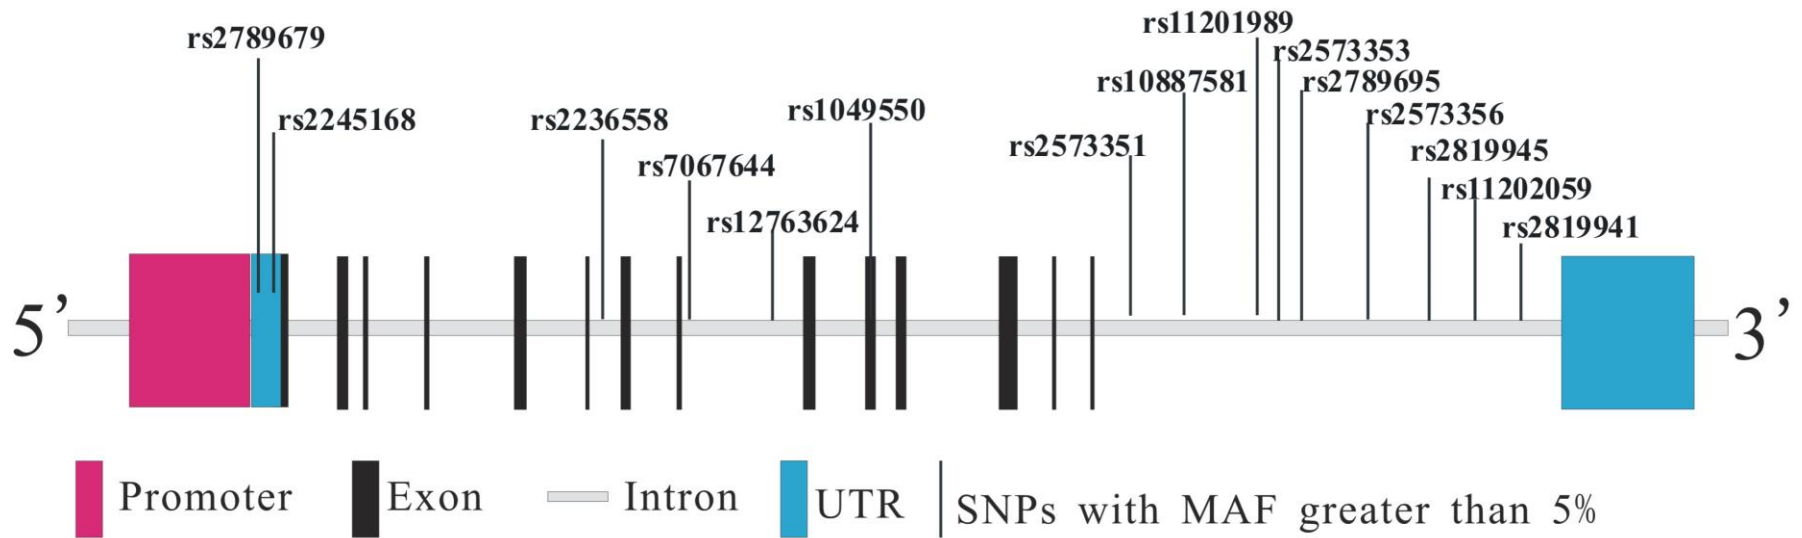

review only

1  
2  
3  
4  
5  
6  
7  
8  
9  
10  
11  
12  
13  
14  
15  
16  
17  
18  
19  
20  
21  
22  
23  
24  
25  
26  
27  
28  
29  
30  
31  
32  
33  
34  
35  
36  
37  
38  
39  
40  
41  
42  
43  
44  
45  
46  
47  
48  
49

Supplemental table 1 Summary of all published sarcoidosis-association studies for ANXA11

| Study           | Population   |          | Type of Study | Sample Size (n) |         | Number of SNPs typed | Positive SNPs                   |
|-----------------|--------------|----------|---------------|-----------------|---------|----------------------|---------------------------------|
|                 | Ethnic group | Country  |               | Sarcoidosis     | Control |                      |                                 |
| Hofmann S, 2008 | Caucasian    | Germany  | Case-control  | 499             | 490     | GWAS                 | rs2789679, rs7091565, rs1049550 |
| Mrazek F, 2011  | Caucasian    | Czech    | Case-control  | 245             | 254     | 1                    | rs1049550                       |
| Cozier YC, 2012 | Caucasian    | America  | Case-control  | 486             | 943     | 10p12-10q22          | rs2789679, rs2819941            |
| Li Y, 2013      | Caucasian    | Germany  | Case-control  | 325             | 364     | 1                    | rs1049550                       |
| Levin AM, 2013  | Caucasian    | America  | Case-control  | 1689            | 1252    | 25                   | rs1049550                       |
| Morais A, 2013  | Caucasian    | Portugal | Case-control  | 208             | 197     | 1                    | rs1049550                       |

review only

**Supplemental Table 2** Genotypic and allelic frequencies of ANXA11 polymorphisms in the controls and patients with sarcoidosis

| Variable     | Controls (n=418 ) |      | Sarcoidosis (n=412) |      | <i>P</i> -value <sup>a</sup> | OR, 95% CI      |
|--------------|-------------------|------|---------------------|------|------------------------------|-----------------|
|              | No.               | %    | No.                 | %    |                              |                 |
| rs2245168    |                   |      |                     |      | 0.920                        |                 |
| CC           | 156               | 37.3 | 150                 | 36.4 | 0.791                        | 1.04, 0.74-1.38 |
| CT           | 200               | 47.9 | 197                 | 47.8 | 0.955                        | 0.99, 0.76-1.30 |
| TT           | 62                | 14.8 | 65                  | 15.8 | 0.781                        | 0.95, 0.65-1.39 |
| Per T allele | 324               | 38.8 | 327                 | 39.7 | 0.698                        | 1.04, 0.85-1.27 |
| rs2236558    |                   |      |                     |      | 0.172                        |                 |
| GG           | 118               | 28.2 | 104                 | 25.2 | 0.72                         | 1.06, 0.77-1.45 |
| TG           | 190               | 45.5 | 214                 | 51.9 | 0.060                        | 0.77, 0.59-1.01 |
| TT           | 110               | 26.3 | 94                  | 22.8 | 0.073                        | 1.33, 0.97-1.82 |
| Per T allele | 410               | 49.0 | 402                 | 48.8 | 0.917                        | 0.99, 0.82-1.20 |
| rs7067644    |                   |      |                     |      | 0.173                        |                 |
| AA           | 152               | 36.4 | 176                 | 42.7 | 0.059                        | 0.76, 0.58-1.01 |
| GA           | 206               | 49.3 | 182                 | 44.2 | 0.137                        | 1.23, 0.94-1.68 |
| GG           | 60                | 14.4 | 54                  | 13.1 | 0.597                        | 1.11, 0.75-1.65 |
| Per G allele | 326               | 38.0 | 290                 | 35.2 | 0.109                        | 0.85, 0.70-1.04 |
| rs12763624   |                   |      |                     |      | 0.118                        |                 |
| TT           | 126               | 75.6 | 150                 | 36.4 | 0.008                        | 0.68, 0.51-0.91 |
| CT           | 216               | 51.7 | 186                 | 45.2 | 0.059                        | 1.30, 0.99-1.71 |
| CC           | 76                | 18.2 | 76                  | 18.5 | 0.411                        | 1.16, 0.81-1.67 |
| Per C allele | 368               | 44.0 | 338                 | 41.0 | 0.216                        | 0.88, 0.73-1.08 |
| rs2573351    |                   |      |                     |      | 0.437                        |                 |

|    |              |     |      |     |      |       |                 |
|----|--------------|-----|------|-----|------|-------|-----------------|
| 1  |              |     |      |     |      |       |                 |
| 2  |              |     |      |     |      |       |                 |
| 3  |              |     |      |     |      |       |                 |
| 4  |              |     |      |     |      |       |                 |
| 5  |              |     |      |     |      |       |                 |
| 6  |              |     |      |     |      |       |                 |
| 7  | TT           | 120 | 28.7 | 104 | 25.2 | 0.263 | 1.19, 0.88-1.62 |
| 8  | CT           | 202 | 48.3 | 216 | 52.4 | 0.238 | 0.85, 0.65-1.12 |
| 9  | CC           | 96  | 23.0 | 92  | 22.3 | 0.826 | 1.04, 0.75-1.44 |
| 10 | Per C allele | 394 | 47.1 | 400 | 48.5 | 0.564 | 1.06, 0.87-1.28 |
| 11 | rs10887581   |     |      |     |      | 0.290 |                 |
| 12 | TT           | 114 | 27.3 | 96  | 23.3 | 0.190 | 1.23, 0.90-1.69 |
| 13 | TC           | 190 | 45.5 | 208 | 50.5 | 0.148 | 0.82, 0.62-1.07 |
| 14 | CC           | 114 | 27.3 | 108 | 26.2 | 0.729 | 1.06, 0.78-1.44 |
| 15 | Per C allele | 418 | 50.0 | 424 | 51.5 | 0.583 | 1.06, 0.87-1.29 |
| 16 | rs11201989   |     |      |     |      | 0.144 |                 |
| 17 | GG           | 130 | 31.1 | 128 | 31.1 | 0.995 | 1.00, 0.75-1.34 |
| 18 | GC           | 218 | 52.2 | 194 | 47.1 | 0.141 | 1.23, 0.93-1.62 |
| 19 | CC           | 70  | 16.8 | 90  | 21.9 | 0.060 | 0.71, 0.50-1.01 |
| 20 | Per C allele | 358 | 42.8 | 374 | 45.4 | 0.29  | 1.11, 0.91-1.35 |
| 21 | rs2573353    |     |      |     |      | 0.918 |                 |
| 22 | CC           | 178 | 42.6 | 176 | 42.7 | 0.957 | 0.99, 0.75-1.31 |
| 23 | CA           | 196 | 46.9 | 192 | 46.6 | 0.921 | 1.01, 0.77-1.33 |
| 24 | AA           | 44  | 10.5 | 44  | 10.7 | 0.941 | 0.98, 0.63-1.53 |
| 25 | Per A allele | 284 | 34.0 | 280 | 34.0 | 0.997 | 1.00, 0.82-1.23 |
| 26 | rs2789695    |     |      |     |      | 0.918 |                 |
| 27 | TT           | 178 | 42.6 | 180 | 34.0 | 0.740 | 0.95, 0.73-1.26 |
| 28 | CT           | 188 | 45.0 | 184 | 44.7 | 0.920 | 1.01, 0.77-1.33 |
| 29 | CC           | 52  | 12.4 | 48  | 11.7 | 0.73  | 1.08, 0.71-1.64 |
| 30 | Per C allele | 292 | 34.9 | 280 | 34.0 | 0.69  | 0.96, 0.78-1.17 |
| 31 | rs2573356    |     |      |     |      | 0.892 |                 |
| 32 | CC           | 118 | 28.2 | 112 | 27.2 | 0.742 | 1.05, 0.78-1.43 |
| 33 |              |     |      |     |      |       |                 |
| 34 |              |     |      |     |      |       |                 |
| 35 |              |     |      |     |      |       |                 |
| 36 |              |     |      |     |      |       |                 |
| 37 |              |     |      |     |      |       |                 |
| 38 |              |     |      |     |      |       |                 |
| 39 |              |     |      |     |      |       |                 |
| 40 |              |     |      |     |      |       |                 |
| 41 |              |     |      |     |      |       |                 |
| 42 |              |     |      |     |      |       |                 |
| 43 |              |     |      |     |      |       |                 |
| 44 |              |     |      |     |      |       |                 |
| 45 |              |     |      |     |      |       |                 |
| 46 |              |     |      |     |      |       |                 |
| 47 |              |     |      |     |      |       |                 |
| 48 |              |     |      |     |      |       |                 |
| 49 |              |     |      |     |      |       |                 |



|              |     |      |     |      |       |                 |
|--------------|-----|------|-----|------|-------|-----------------|
| CT           | 190 | 45.5 | 194 | 47.1 | 0.639 | 0.94, 0.71-1.23 |
| TT           | 110 | 26.3 | 106 | 25.7 | 0.843 | 1.03, 0.76-1.41 |
| Per T allele | 410 | 49.0 | 406 | 49.3 | 0.926 | 0.99, 0.82-1.20 |
| rs2819945    |     |      |     |      | 0.101 |                 |
| GG           | 119 | 28.5 | 130 | 31.6 | 0.294 | 0.85, 0.63-1.15 |
| GA           | 221 | 52.9 | 188 | 45.6 | 0.030 | 1.35, 1.03-1.78 |
| AA           | 78  | 18.7 | 94  | 22.8 | 0.138 | 0.78, 0.55-1.09 |
| Per A allele | 377 | 45.1 | 376 | 45.6 | 0.827 | 1.02, 0.84-1.24 |
| rs11202059   |     |      |     |      | 0.064 |                 |
| GG           | 106 | 25.4 | 128 | 31.1 | 0.067 | 0.75, 0.56-1.02 |
| GA           | 226 | 54.1 | 190 | 46.1 | 0.021 | 1.38, 1.05-1.81 |
| AA           | 86  | 20.6 | 94  | 22.8 | 0.429 | 0.88, 0.63-1.22 |
| Per A allele | 398 | 47.6 | 378 | 45.9 | 0.479 | 0.93, 0.77-1.13 |

<sup>a</sup> *P*-value was calculated by 2×3 and 2×2 chi-squared tests based on codominant, dominant for the rare allele, heterosis and recessive for the rare allele models of inheritance.

Alpha value is adjusted by Bonferroni correction and statistically significant results ( $P < 0.003$ )

**Supplementary table 3** Multi-SNP analysis of rs2789679, rs1049550 and rs2819941

| Models                                | testing SNP  | P-value | OR   | 95%CI     |
|---------------------------------------|--------------|---------|------|-----------|
| model1: rs2789679+ rs1049550          | rs2789679: A | 0.11    | 1.19 | 0.96-1.48 |
| model2: rs2819941+rs1049550           | rs2819941: T | 0.169   | 1.17 | 0.94-1.45 |
| model3: rs2789679+rs1049550+rs2819941 | rs1049550: T | 0.0002  | 0.65 | 0.52-0.82 |

For peer review only

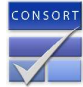

## CONSORT 2010 checklist of information to include when reporting a randomised trial\*

| Section/Topic                    | Item No | Checklist item                                                                                                                                                                              | Reported on page No |
|----------------------------------|---------|---------------------------------------------------------------------------------------------------------------------------------------------------------------------------------------------|---------------------|
| <b>Title and abstract</b>        |         |                                                                                                                                                                                             |                     |
|                                  | 1a      | Identification as a randomised trial in the title                                                                                                                                           | 1                   |
|                                  | 1b      | Structured summary of trial design, methods, results, and conclusions (for specific guidance see CONSORT for abstracts)                                                                     | 2-3                 |
| <b>Introduction</b>              |         |                                                                                                                                                                                             |                     |
| Background and objectives        | 2a      | Scientific background and explanation of rationale                                                                                                                                          | 5-6                 |
|                                  | 2b      | Specific objectives or hypotheses                                                                                                                                                           | 6                   |
| <b>Methods</b>                   |         |                                                                                                                                                                                             |                     |
| Trial design                     | 3a      | Description of trial design (such as parallel, factorial) including allocation ratio                                                                                                        | 7                   |
|                                  | 3b      | Important changes to methods after trial commencement (such as eligibility criteria), with reasons                                                                                          | 7                   |
| Participants                     | 4a      | Eligibility criteria for participants                                                                                                                                                       | 7                   |
|                                  | 4b      | Settings and locations where the data were collected                                                                                                                                        | 7                   |
| Interventions                    | 5       | The interventions for each group with sufficient details to allow replication, including how and when they were actually administered                                                       | 8                   |
| Outcomes                         | 6a      | Completely defined pre-specified primary and secondary outcome measures, including how and when they were assessed                                                                          | 7                   |
|                                  | 6b      | Any changes to trial outcomes after the trial commenced, with reasons                                                                                                                       | 7                   |
| Sample size                      | 7a      | How sample size was determined                                                                                                                                                              | 7                   |
|                                  | 7b      | When applicable, explanation of any interim analyses and stopping guidelines                                                                                                                | 7                   |
| <b>Randomisation:</b>            |         |                                                                                                                                                                                             |                     |
| Sequence generation              | 8a      | Method used to generate the random allocation sequence                                                                                                                                      | 8                   |
|                                  | 8b      | Type of randomisation; details of any restriction (such as blocking and block size)                                                                                                         | 8                   |
| Allocation concealment mechanism | 9       | Mechanism used to implement the random allocation sequence (such as sequentially numbered containers), describing any steps taken to conceal the sequence until interventions were assigned | 7                   |
| Implementation                   | 10      | Who generated the random allocation sequence, who enrolled participants, and who assigned participants to interventions                                                                     | 7                   |
| Blinding                         | 11a     | If done, who was blinded after assignment to interventions (for example, participants, care providers, those                                                                                | 7                   |

|    |                          |                                                                                                                     |       |
|----|--------------------------|---------------------------------------------------------------------------------------------------------------------|-------|
| 1  |                          |                                                                                                                     |       |
| 2  |                          | assessing outcomes) and how                                                                                         |       |
| 3  |                          |                                                                                                                     |       |
| 4  |                          | 11b If relevant, description of the similarity of interventions                                                     | 8     |
| 5  | Statistical methods      | 12a Statistical methods used to compare groups for primary and secondary outcomes                                   | 8-9   |
| 6  |                          | 12b Methods for additional analyses, such as subgroup analyses and adjusted analyses                                | 8     |
| 7  |                          |                                                                                                                     |       |
| 8  | <b>Results</b>           |                                                                                                                     |       |
| 9  | Participant flow (a      | 13a For each group, the numbers of participants who were randomly assigned, received intended treatment, and        | 10-11 |
| 10 | diagram is strongly      | were analysed for the primary outcome                                                                               |       |
| 11 | recommended)             | 13b For each group, losses and exclusions after randomisation, together with reasons                                | 10-11 |
| 12 | Recruitment              | 14a Dates defining the periods of recruitment and follow-up                                                         | 10    |
| 13 |                          | 14b Why the trial ended or was stopped                                                                              | 10    |
| 14 |                          |                                                                                                                     |       |
| 15 | Baseline data            | 15 A table showing baseline demographic and clinical characteristics for each group                                 | 10    |
| 16 | Numbers analysed         | 16 For each group, number of participants (denominator) included in each analysis and whether the analysis was      | 11    |
| 17 |                          | by original assigned groups                                                                                         |       |
| 18 |                          |                                                                                                                     |       |
| 19 | Outcomes and             | 17a For each primary and secondary outcome, results for each group, and the estimated effect size and its           | 11    |
| 20 | estimation               | precision (such as 95% confidence interval)                                                                         |       |
| 21 |                          | 17b For binary outcomes, presentation of both absolute and relative effect sizes is recommended                     | 11    |
| 22 | Ancillary analyses       | 18 Results of any other analyses performed, including subgroup analyses and adjusted analyses, distinguishing       | 11    |
| 23 |                          | pre-specified from exploratory                                                                                      |       |
| 24 |                          |                                                                                                                     |       |
| 25 | Harms                    | 19 All important harms or unintended effects in each group (for specific guidance see CONSORT for harms)            |       |
| 26 |                          |                                                                                                                     |       |
| 27 | <b>Discussion</b>        |                                                                                                                     |       |
| 28 | Limitations              | 20 Trial limitations, addressing sources of potential bias, imprecision, and, if relevant, multiplicity of analyses | 11-15 |
| 29 | Generalisability         | 21 Generalisability (external validity, applicability) of the trial findings                                        | 12-14 |
| 30 | Interpretation           | 22 Interpretation consistent with results, balancing benefits and harms, and considering other relevant evidence    | 12    |
| 31 |                          |                                                                                                                     |       |
| 32 | <b>Other information</b> |                                                                                                                     |       |
| 33 | Registration             | 23 Registration number and name of trial registry                                                                   | 13    |
| 34 | Protocol                 | 24 Where the full trial protocol can be accessed, if available                                                      | 14    |
| 35 | Funding                  | 25 Sources of funding and other support (such as supply of drugs), role of funders                                  | 15    |
| 36 |                          |                                                                                                                     |       |

37

38 \*We strongly recommend reading this statement in conjunction with the CONSORT 2010 Explanation and Elaboration for important clarifications on all the items. If relevant, we also

39 recommend reading CONSORT extensions for cluster randomised trials, non-inferiority and equivalence trials, non-pharmacological treatments, herbal interventions, and pragmatic trials.

40 Additional extensions are forthcoming: for those and for up to date references relevant to this checklist, see [www.consort-statement.org](http://www.consort-statement.org).

41

42
