# Supplementary figures and images for: Annexin A11 (ANXA11) gene polymorphisms are associated with sarcoidosis in a Han Chinese population: a case–control study
Source: HighWire-hosted journal article supplement (doi:10.1136/bmjopen-2013-004466), 2014-07-01

**Supplemental Fig. 1** The structure of the human ANXA11 gene and 15 SNPs located 16 on the gene.

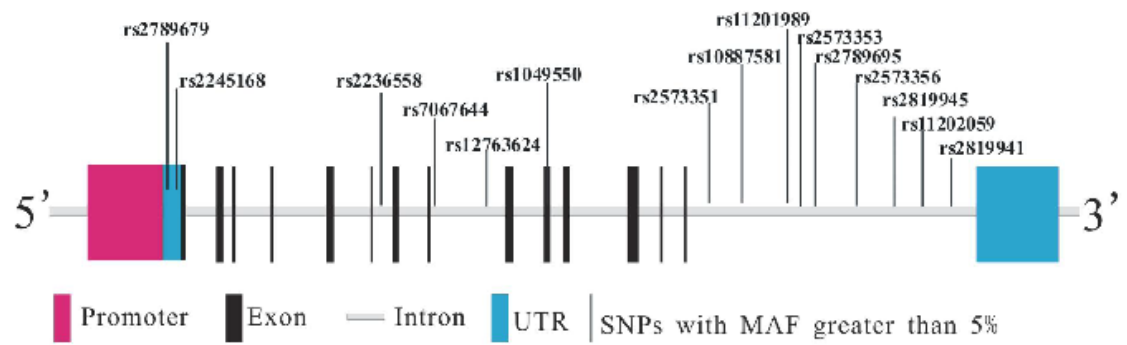

Supplement: bmjopen-2013-004466supp_figure.pdf [file bmjopen-2013-004466supp_figure.pdf]
